# Supplementary material for: Single-Cell Sequencing Revealed Pivotal Genes Related to Prognosis of Myocardial Infarction Patients
Source: Hindawi journal article supplement (doi:10.1155/2022/6534126), 2022-03-12
Supplement: f4 [file 6534126.f4.pdf]

Table S1 The marker genes of each subgroup

| p_val     | avg_logFC | pct.1 | pct.2 | p_val_adj | cluster | gene     | pct.diff |
|-----------|-----------|-------|-------|-----------|---------|----------|----------|
| 2.25E-131 | 1.801954  | 0.938 | 0.26  | 3.54E-127 | 0       | SLC9A3R2 | 0.678    |
| 1.71E-127 | 1.537724  | 0.963 | 0.318 | 2.69E-123 | 0       | EGFL7    | 0.645    |
| 9.13E-118 | 1.540158  | 0.953 | 0.363 | 1.44E-113 | 0       | RAMP2    | 0.59     |
| 2.36E-116 | 1.95946   | 0.849 | 0.194 | 3.72E-112 | 0       | TNNT3    | 0.655    |
| 2.08E-115 | 1.650877  | 0.854 | 0.201 | 3.27E-111 | 0       | TMEM88   | 0.653    |
| 4.55E-115 | 1.427449  | 0.965 | 0.26  | 7.16E-111 | 0       | VWF      | 0.705    |
| 5.06E-114 | 1.650691  | 0.903 | 0.24  | 7.96E-110 | 0       | RBP7     | 0.663    |
| 1.31E-112 | 1.430122  | 0.975 | 0.557 | 2.06E-108 | 0       | IFI27    | 0.418    |
| 1.61E-112 | 1.551519  | 0.968 | 0.39  | 2.53E-108 | 0       | FABP4    | 0.578    |
| 2.98E-112 | 1.369359  | 0.968 | 0.544 | 4.68E-108 | 0       | CAV1     | 0.424    |
| 1.24E-107 | 1.721549  | 0.901 | 0.3   | 1.95E-103 | 0       | ID1      | 0.601    |
| 1.09E-106 | 1.495228  | 0.97  | 0.538 | 1.72E-102 | 0       | FABP5    | 0.432    |
| 1.32E-104 | 1.357238  | 0.859 | 0.238 | 2.08E-100 | 0       | S1PR1    | 0.621    |
| 5.23E-102 | 1.198465  | 0.965 | 0.584 | 8.22E-98  | 0       | GNG11    | 0.381    |
| 1.35E-100 | 1.206656  | 0.968 | 0.538 | 2.13E-96  | 0       | A2M      | 0.43     |
| 1.71E-98  | 1.085542  | 0.983 | 0.801 | 2.69E-94  | 0       | HLA-B    | 0.182    |
| 4.14E-98  | 1.327403  | 0.849 | 0.229 | 6.51E-94  | 0       | EMCN     | 0.62     |
| 4.91E-97  | 1.066583  | 0.968 | 0.368 | 7.72E-93  | 0       | RNASE1   | 0.6      |
| 1.08E-95  | 1.407368  | 0.834 | 0.268 | 1.69E-91  | 0       | ICAM2    | 0.566    |
| 2.69E-95  | 0.992841  | 0.98  | 0.806 | 4.23E-91  | 0       | HLA-C    | 0.174    |
| 2.88E-94  | 1.189005  | 0.953 | 0.538 | 4.52E-90  | 0       | BST2     | 0.415    |
| 2.04E-91  | 1.334063  | 0.871 | 0.335 | 3.21E-87  | 0       | ITM2A    | 0.536    |
| 1.06E-89  | 0.795411  | 0.99  | 0.962 | 1.67E-85  | 0       | TMSB10   | 0.028    |
| 1.44E-89  | 0.737426  | 0.99  | 0.997 | 2.26E-85  | 0       | B2M      | -0.007   |
| 1.33E-87  | 1.280809  | 0.941 | 0.372 | 2.08E-83  | 0       | CD36     | 0.569    |
| 1.69E-87  | 1.329914  | 0.725 | 0.166 | 2.65E-83  | 0       | F8       | 0.559    |
| 4.19E-87  | 1.232444  | 0.832 | 0.24  | 6.59E-83  | 0       | ADGRF5   | 0.592    |
| 5.49E-86  | 1.276066  | 0.765 | 0.209 | 8.64E-82  | 0       | CDH5     | 0.556    |
| 1.00E-85  | 1.373244  | 0.686 | 0.134 | 1.58E-81  | 0       | SLC14A1  | 0.552    |
| 1.34E-85  | 1.53369   | 0.678 | 0.126 | 2.11E-81  | 0       | CLDN5    | 0.552    |
| 5.10E-83  | 1.157373  | 0.871 | 0.297 | 8.02E-79  | 0       | PECAM1   | 0.574    |
| 2.72E-81  | 0.876517  | 0.968 | 0.746 | 4.28E-77  | 0       | HLA-E    | 0.222    |
| 4.95E-81  | 1.087774  | 0.896 | 0.481 | 7.78E-77  | 0       | STOM     | 0.415    |
| 1.79E-79  | 1.167377  | 0.842 | 0.326 | 2.81E-75  | 0       | ESAM     | 0.516    |
| 1.13E-77  | 1.600932  | 0.767 | 0.257 | 1.78E-73  | 0       | AQP1     | 0.51     |
| 1.84E-77  | 1.190818  | 0.871 | 0.44  | 2.89E-73  | 0       | MGLL     | 0.431    |
| 1.42E-75  | 1.304357  | 0.609 | 0.109 | 2.24E-71  | 0       | BTNL9    | 0.5      |
| 1.49E-75  | 0.772413  | 0.946 | 0.363 | 2.34E-71  | 0       | HLA-DRB1 | 0.583    |
| 2.33E-75  | 1.250608  | 0.8   | 0.288 | 3.66E-71  | 0       | SDPR     | 0.512    |
| 3.14E-74  | 1.729382  | 0.582 | 0.09  | 4.93E-70  | 0       | CA4      | 0.492    |
| 8.32E-74  | 0.731585  | 0.978 | 0.507 | 1.31E-69  | 0       | CD74     | 0.471    |
| 1.87E-73  | 1.189334  | 0.691 | 0.171 | 2.94E-69  | 0       | FAM107A  | 0.52     |
| 5.69E-73  | 0.839098  | 0.889 | 0.315 | 8.94E-69  | 0       | HLA-DRB5 | 0.574    |
| 1.54E-72  | 1.111383  | 0.936 | 0.515 | 2.43E-68  | 0       | TM4SF1   | 0.421    |
| 1.22E-71  | 1.128504  | 0.804 | 0.334 | 1.92E-67  | 0       | PLPP1    | 0.47     |
| 1.78E-71  | 1.06779   | 0.757 | 0.212 | 2.80E-67  | 0       | RAMP3    | 0.545    |
| 2.13E-70  | 0.77463   | 0.978 | 0.824 | 3.35E-66  | 0       | HLA-A    | 0.154    |
| 1.78E-69  | 1.178763  | 0.587 | 0.107 | 2.80E-65  | 0       | CLIC5    | 0.48     |
| 7.68E-69  | 1.197881  | 0.666 | 0.182 | 1.21E-64  | 0       | ANXA3    | 0.484    |
| 9.50E-69  | 1.152494  | 0.663 | 0.175 | 1.49E-64  | 0       | CYYR1    | 0.488    |
| 1.49E-68  | 1.162536  | 0.718 | 0.221 | 2.35E-64  | 0       | FLT1     | 0.497    |
| 1.46E-65  | 1.041949  | 0.72  | 0.24  | 2.29E-61  | 0       | CD93     | 0.48     |
| 2.93E-64  | 1.02999   | 0.636 | 0.165 | 4.61E-60  | 0       | NRN1     | 0.471    |
| 1.26E-63  | 1.011359  | 0.691 | 0.199 | 1.98E-59  | 0       | PTPRB    | 0.492    |
| 1.48E-63  | 1.105795  | 0.663 | 0.204 | 2.33E-59  | 0       | WARS     | 0.459    |
| 3.17E-63  | 0.846089  | 0.931 | 0.674 | 4.99E-59  | 0       | FKBP1A   | 0.257    |

|          |          |       |       |          |            |       |
|----------|----------|-------|-------|----------|------------|-------|
| 6.08E-62 | 1.122033 | 0.658 | 0.207 | 9.57E-58 | 0 PODXL    | 0.451 |
| 1.21E-61 | 1.008282 | 0.656 | 0.191 | 1.90E-57 | 0 ADGRL4   | 0.465 |
| 7.19E-61 | 1.081946 | 0.634 | 0.181 | 1.13E-56 | 0 RGCC     | 0.453 |
| 1.44E-59 | 0.991443 | 0.589 | 0.147 | 2.27E-55 | 0 MYCT1    | 0.442 |
| 5.27E-59 | 1.088114 | 0.604 | 0.171 | 8.28E-55 | 0 TSPAN13  | 0.433 |
| 2.70E-58 | 0.928615 | 0.797 | 0.394 | 4.25E-54 | 0 CAV2     | 0.403 |
| 2.87E-58 | 0.59916  | 0.983 | 0.971 | 4.52E-54 | 0 IFITM3   | 0.012 |
| 1.67E-57 | 0.868675 | 0.938 | 0.6   | 2.62E-53 | 0 ID3      | 0.338 |
| 3.22E-57 | 1.356884 | 0.579 | 0.147 | 5.06E-53 | 0 LPL      | 0.432 |
| 8.09E-55 | 0.892244 | 0.822 | 0.4   | 1.27E-50 | 0 EPAS1    | 0.422 |
| 4.19E-54 | 0.91404  | 0.713 | 0.29  | 6.58E-50 | 0 SEC14L1  | 0.423 |
| 1.00E-53 | 1.005748 | 0.55  | 0.135 | 1.58E-49 | 0 ITGA6    | 0.415 |
| 2.38E-53 | 0.924452 | 0.71  | 0.272 | 3.74E-49 | 0 GIMAP4   | 0.438 |
| 4.25E-52 | 0.918055 | 0.866 | 0.531 | 6.69E-48 | 0 ENG      | 0.335 |
| 1.69E-51 | 0.92112  | 0.631 | 0.224 | 2.66E-47 | 0 JAM2     | 0.407 |
| 2.05E-51 | 0.967182 | 0.619 | 0.199 | 3.22E-47 | 0 PALMD    | 0.42  |
| 1.90E-50 | 0.730422 | 0.97  | 0.775 | 2.99E-46 | 0 IFITM1   | 0.195 |
| 2.98E-49 | 0.919972 | 0.55  | 0.159 | 4.68E-45 | 0 EFNA1    | 0.391 |
| 4.65E-49 | 0.916692 | 0.728 | 0.329 | 7.31E-45 | 0 CLEC14A  | 0.399 |
| 9.97E-47 | 0.925733 | 0.715 | 0.306 | 1.57E-42 | 0 IGF2     | 0.409 |
| 1.98E-46 | 0.730222 | 0.901 | 0.647 | 3.12E-42 | 0 LGALS3   | 0.254 |
| 7.11E-46 | 0.966116 | 0.522 | 0.149 | 1.12E-41 | 0 MLLT4    | 0.373 |
| 8.53E-46 | 0.917714 | 0.495 | 0.129 | 1.34E-41 | 0 ABLIM3   | 0.366 |
| 1.09E-45 | 0.891311 | 0.535 | 0.156 | 1.71E-41 | 0 SH2D3C   | 0.379 |
| 6.96E-45 | 0.756703 | 0.814 | 0.554 | 1.10E-40 | 0 CDC37    | 0.26  |
| 8.11E-45 | 0.873103 | 0.683 | 0.307 | 1.28E-40 | 0 KLF2     | 0.376 |
| 1.51E-44 | 0.872058 | 0.606 | 0.219 | 2.38E-40 | 0 ADAM15   | 0.387 |
| 1.81E-44 | 0.873586 | 0.579 | 0.197 | 2.85E-40 | 0 LDB2     | 0.382 |
| 1.99E-44 | 0.843474 | 0.616 | 0.229 | 3.13E-40 | 0 NEDD9    | 0.387 |
| 2.35E-44 | 0.907684 | 0.604 | 0.218 | 3.69E-40 | 0 SGK1     | 0.386 |
| 3.24E-44 | 0.904264 | 0.666 | 0.266 | 5.09E-40 | 0 CLEC3B   | 0.4   |
| 3.78E-44 | 0.792859 | 0.918 | 0.703 | 5.94E-40 | 0 DDIT4    | 0.215 |
| 8.65E-44 | 0.76868  | 0.8   | 0.41  | 1.36E-39 | 0 IL32     | 0.39  |
| 9.03E-44 | 0.935388 | 0.488 | 0.134 | 1.42E-39 | 0 CD82     | 0.354 |
| 1.45E-43 | 0.884834 | 0.597 | 0.204 | 2.28E-39 | 0 APOLD1   | 0.393 |
| 2.05E-43 | 0.752985 | 0.884 | 0.671 | 3.23E-39 | 0 LY6E     | 0.213 |
| 2.51E-43 | 0.885392 | 0.493 | 0.138 | 3.95E-39 | 0 NOTCH4   | 0.355 |
| 3.77E-43 | 0.719958 | 0.802 | 0.385 | 5.92E-39 | 0 BCAM     | 0.417 |
| 4.00E-43 | 0.682411 | 0.921 | 0.609 | 6.29E-39 | 0 CRIP2    | 0.312 |
| 1.68E-42 | 0.949626 | 0.418 | 0.087 | 2.65E-38 | 0 CD300LG  | 0.331 |
| 8.87E-42 | 0.897461 | 0.473 | 0.131 | 1.39E-37 | 0 PIK3R3   | 0.342 |
| 8.88E-42 | 0.786594 | 0.698 | 0.31  | 1.40E-37 | 0 CALCRL   | 0.388 |
| 1.37E-41 | 0.682183 | 0.725 | 0.338 | 2.16E-37 | 0 IGFBP4   | 0.387 |
| 1.79E-41 | 0.940134 | 0.559 | 0.199 | 2.81E-37 | 0 C8orf4   | 0.36  |
| 3.19E-41 | 0.788534 | 0.767 | 0.485 | 5.02E-37 | 0 VAMP5    | 0.282 |
| 1.35E-40 | 0.77404  | 0.421 | 0.093 | 2.13E-36 | 0 ARHGEF15 | 0.328 |
| 1.40E-40 | 0.893    | 0.661 | 0.321 | 2.21E-36 | 0 PHACTR2  | 0.34  |
| 1.85E-40 | 0.749526 | 0.423 | 0.094 | 2.91E-36 | 0 GALNT18  | 0.329 |
| 2.89E-40 | 0.8188   | 0.448 | 0.115 | 4.55E-36 | 0 TEK      | 0.333 |
| 5.48E-40 | 0.820015 | 0.582 | 0.225 | 8.62E-36 | 0 CTSH     | 0.357 |
| 8.68E-40 | 0.841649 | 0.485 | 0.138 | 1.37E-35 | 0 TM4SF18  | 0.347 |
| 2.26E-39 | 0.747576 | 0.762 | 0.399 | 3.56E-35 | 0 CD34     | 0.363 |
| 5.50E-39 | 0.811932 | 0.584 | 0.229 | 8.66E-35 | 0 MGST2    | 0.355 |
| 8.07E-39 | 0.74192  | 0.782 | 0.493 | 1.27E-34 | 0 TACC1    | 0.289 |
| 3.21E-38 | 1.115292 | 0.386 | 0.076 | 5.04E-34 | 0 FCN3     | 0.31  |
| 9.27E-38 | 0.827157 | 0.411 | 0.097 | 1.46E-33 | 0 HECW2    | 0.314 |
| 1.00E-37 | 0.804885 | 0.512 | 0.178 | 1.58E-33 | 0 KIAA1462 | 0.334 |
| 1.04E-37 | 0.816581 | 0.46  | 0.132 | 1.64E-33 | 0 TSPAN7   | 0.328 |

|          |          |       |       |          |             |       |
|----------|----------|-------|-------|----------|-------------|-------|
| 5.03E-37 | 0.780614 | 0.735 | 0.426 | 7.91E-33 | 0 IFNGR1    | 0.309 |
| 6.14E-37 | 0.679179 | 0.785 | 0.485 | 9.66E-33 | 0 TMEM204   | 0.3   |
| 8.84E-37 | 0.651934 | 0.72  | 0.375 | 1.39E-32 | 0 PSMB9     | 0.345 |
| 3.51E-36 | 0.76098  | 0.436 | 0.121 | 5.52E-32 | 0 ATOH8     | 0.315 |
| 1.55E-35 | 0.833955 | 0.505 | 0.172 | 2.44E-31 | 0 MMRN2     | 0.333 |
| 1.64E-35 | 0.790612 | 0.463 | 0.143 | 2.57E-31 | 0 ADCY4     | 0.32  |
| 1.94E-35 | 0.838768 | 0.54  | 0.203 | 3.05E-31 | 0 ASS1      | 0.337 |
| 2.46E-35 | 0.622819 | 0.856 | 0.59  | 3.87E-31 | 0 CD59      | 0.266 |
| 2.76E-35 | 0.662382 | 0.847 | 0.581 | 4.33E-31 | 0 SPTBN1    | 0.266 |
| 7.51E-34 | 0.7967   | 0.453 | 0.144 | 1.18E-29 | 0 MALL      | 0.309 |
| 1.22E-33 | 0.72973  | 0.431 | 0.122 | 1.92E-29 | 0 ROBO4     | 0.309 |
| 1.87E-33 | 0.794712 | 0.436 | 0.134 | 2.94E-29 | 0 AIF1L     | 0.302 |
| 8.55E-33 | 0.695722 | 0.53  | 0.197 | 1.34E-28 | 0 HYAL2     | 0.333 |
| 1.00E-32 | 0.78291  | 0.411 | 0.119 | 1.57E-28 | 0 CX3CL1    | 0.292 |
| 1.26E-32 | 0.739122 | 0.361 | 0.087 | 1.99E-28 | 0 HYAL1     | 0.274 |
| 2.43E-32 | 0.781305 | 0.579 | 0.275 | 3.83E-28 | 0 LAP3      | 0.304 |
| 2.83E-32 | 0.770301 | 0.436 | 0.138 | 4.45E-28 | 0 TIE1      | 0.298 |
| 1.06E-31 | 0.722134 | 0.473 | 0.169 | 1.67E-27 | 0 GPRC5B    | 0.304 |
| 1.39E-31 | 0.623861 | 0.77  | 0.494 | 2.19E-27 | 0 PTRF      | 0.276 |
| 2.44E-31 | 0.731431 | 0.52  | 0.206 | 3.83E-27 | 0 GIMAP7    | 0.314 |
| 4.67E-31 | 0.655336 | 0.507 | 0.193 | 7.34E-27 | 0 GIMAP6    | 0.314 |
| 1.67E-30 | 0.698385 | 0.426 | 0.129 | 2.63E-26 | 0 CXorf36   | 0.297 |
| 5.33E-30 | 0.693486 | 0.574 | 0.276 | 8.38E-26 | 0 S100A16   | 0.298 |
| 9.03E-30 | 0.660984 | 0.272 | 0.04  | 1.42E-25 | 0 KLK1      | 0.232 |
| 1.08E-29 | 0.644596 | 0.351 | 0.087 | 1.71E-25 | 0 HSPA12B   | 0.264 |
| 1.47E-29 | 0.682184 | 0.374 | 0.103 | 2.31E-25 | 0 MCF2L     | 0.271 |
| 2.88E-29 | 0.707609 | 0.453 | 0.166 | 4.53E-25 | 0 PTPRM     | 0.287 |
| 1.19E-28 | 0.683335 | 0.715 | 0.459 | 1.87E-24 | 0 GYPC      | 0.256 |
| 1.33E-28 | 0.643637 | 0.292 | 0.056 | 2.09E-24 | 0 RP11-536C | 0.236 |
| 1.74E-28 | 0.705021 | 0.28  | 0.05  | 2.73E-24 | 0 GPIHBP1   | 0.23  |
| 1.89E-28 | 0.67505  | 0.478 | 0.193 | 2.98E-24 | 0 ELK3      | 0.285 |
| 2.23E-28 | 0.609495 | 0.822 | 0.635 | 3.51E-24 | 0 POMP      | 0.187 |
| 6.50E-28 | 0.648157 | 0.436 | 0.159 | 1.02E-23 | 0 RFTN1     | 0.277 |
| 2.46E-27 | 0.615051 | 0.295 | 0.062 | 3.87E-23 | 0 DLL4      | 0.233 |
| 2.52E-27 | 0.704588 | 0.307 | 0.065 | 3.96E-23 | 0 STC1      | 0.242 |
| 2.56E-27 | 0.664302 | 0.349 | 0.093 | 4.03E-23 | 0 KDR       | 0.256 |
| 2.80E-27 | 0.591901 | 0.332 | 0.084 | 4.40E-23 | 0 SMAGP     | 0.248 |
| 3.55E-27 | 0.653108 | 0.646 | 0.34  | 5.58E-23 | 0 NRP1      | 0.306 |
| 4.69E-27 | 0.634935 | 0.606 | 0.315 | 7.37E-23 | 0 LIMS2     | 0.291 |
| 1.10E-26 | 0.666767 | 0.609 | 0.334 | 1.72E-22 | 0 PPFIBP1   | 0.275 |
| 2.61E-26 | 0.765198 | 0.651 | 0.372 | 4.10E-22 | 0 COL4A1    | 0.279 |
| 5.02E-26 | 0.674214 | 0.48  | 0.204 | 7.89E-22 | 0 PXN       | 0.276 |
| 6.59E-26 | 0.6136   | 0.636 | 0.372 | 1.04E-21 | 0 CYB5A     | 0.264 |
| 1.21E-25 | 0.682808 | 0.488 | 0.207 | 1.91E-21 | 0 LIFR      | 0.281 |
| 2.29E-25 | 0.577841 | 0.738 | 0.484 | 3.60E-21 | 0 PPIC      | 0.254 |
| 3.09E-25 | 0.623984 | 0.512 | 0.232 | 4.87E-21 | 0 TSPAN14   | 0.28  |
| 3.52E-25 | 0.612049 | 0.307 | 0.078 | 5.54E-21 | 0 SOX18     | 0.229 |
| 4.85E-25 | 0.665679 | 0.381 | 0.129 | 7.63E-21 | 0 TSPAN18   | 0.252 |
| 7.32E-25 | 0.689852 | 0.564 | 0.313 | 1.15E-20 | 0 CAPN2     | 0.251 |
| 1.35E-24 | 0.572819 | 0.347 | 0.106 | 2.12E-20 | 0 HIF3A     | 0.241 |
| 3.80E-24 | 0.601064 | 0.272 | 0.06  | 5.97E-20 | 0 SOX17     | 0.212 |
| 3.96E-24 | 0.649548 | 0.562 | 0.297 | 6.22E-20 | 0 TJP1      | 0.265 |
| 4.36E-24 | 0.629537 | 0.327 | 0.097 | 6.86E-20 | 0 ARAP3     | 0.23  |
| 6.54E-24 | 0.545728 | 0.532 | 0.243 | 1.03E-19 | 0 ETS1      | 0.289 |
| 7.38E-24 | 0.591876 | 0.609 | 0.354 | 1.16E-19 | 0 PSMB8     | 0.255 |
| 8.60E-24 | 0.562225 | 0.287 | 0.068 | 1.35E-19 | 0 PCDH12    | 0.219 |
| 2.05E-23 | 0.628093 | 0.29  | 0.074 | 3.23E-19 | 0 AQP7      | 0.216 |
| 4.16E-23 | 0.616494 | 0.48  | 0.213 | 6.54E-19 | 0 LPAR6     | 0.267 |

|          |          |       |       |          |            |       |
|----------|----------|-------|-------|----------|------------|-------|
| 1.08E-22 | 0.56075  | 0.686 | 0.429 | 1.70E-18 | 0 PDLIM1   | 0.257 |
| 1.16E-22 | 0.770291 | 0.275 | 0.066 | 1.83E-18 | 0 TNFRSF4  | 0.209 |
| 1.76E-22 | 0.608842 | 0.302 | 0.088 | 2.76E-18 | 0 EFNB2    | 0.214 |
| 3.52E-22 | 0.549535 | 0.332 | 0.107 | 5.54E-18 | 0 ERG      | 0.225 |
| 3.79E-22 | 0.691812 | 0.408 | 0.171 | 5.96E-18 | 0 CDKN1C   | 0.237 |
| 4.12E-22 | 0.686056 | 0.423 | 0.176 | 6.47E-18 | 0 TIMP4    | 0.247 |
| 6.26E-22 | 0.653006 | 0.324 | 0.101 | 9.84E-18 | 0 AQP3     | 0.223 |
| 8.68E-22 | 0.632554 | 0.319 | 0.101 | 1.37E-17 | 0 C19orf33 | 0.218 |
| 9.44E-22 | 0.601527 | 0.319 | 0.099 | 1.48E-17 | 0 KANK3    | 0.22  |
| 1.00E-21 | 0.578556 | 0.302 | 0.088 | 1.57E-17 | 0 PCDH1    | 0.214 |
| 1.88E-21 | 0.626299 | 0.431 | 0.185 | 2.95E-17 | 0 XAF1     | 0.246 |
| 2.63E-21 | 0.62631  | 0.542 | 0.299 | 4.13E-17 | 0 LEPROTL1 | 0.243 |
| 4.17E-21 | 0.520314 | 0.255 | 0.059 | 6.56E-17 | 0 RASIP1   | 0.196 |
| 4.73E-21 | 0.533112 | 0.257 | 0.063 | 7.44E-17 | 0 CA8      | 0.194 |
| 6.64E-21 | 0.670077 | 0.502 | 0.272 | 1.04E-16 | 0 C1orf54  | 0.23  |
| 8.37E-21 | 0.535784 | 0.646 | 0.437 | 1.32E-16 | 0 FLOT1    | 0.209 |
| 1.18E-20 | 0.590353 | 0.339 | 0.121 | 1.86E-16 | 0 GIMAP1   | 0.218 |
| 1.78E-20 | 0.554438 | 0.715 | 0.488 | 2.79E-16 | 0 RHOB     | 0.227 |
| 3.06E-20 | 0.54327  | 0.411 | 0.172 | 4.81E-16 | 0 ADGRG1   | 0.239 |
| 3.29E-20 | 0.525526 | 0.713 | 0.549 | 5.17E-16 | 0 RHOC     | 0.164 |
| 3.73E-20 | 0.66726  | 0.688 | 0.453 | 5.86E-16 | 0 IER2     | 0.235 |
| 5.26E-20 | 0.542984 | 0.574 | 0.337 | 8.28E-16 | 0 CALCOCO1 | 0.237 |
| 1.00E-19 | 0.539616 | 0.448 | 0.213 | 1.58E-15 | 0 ETS2     | 0.235 |
| 1.06E-19 | 0.502702 | 0.304 | 0.099 | 1.66E-15 | 0 TSPAN15  | 0.205 |
| 1.42E-19 | 0.544745 | 0.468 | 0.232 | 2.24E-15 | 0 TNFSF10  | 0.236 |
| 1.54E-19 | 0.580529 | 0.344 | 0.131 | 2.42E-15 | 0 JUP      | 0.213 |
| 1.64E-19 | 0.520154 | 0.297 | 0.094 | 2.57E-15 | 0 ITPKB    | 0.203 |
| 1.72E-19 | 0.550394 | 0.567 | 0.31  | 2.71E-15 | 0 SYNE2    | 0.257 |
| 2.66E-19 | 0.514033 | 0.292 | 0.093 | 4.18E-15 | 0 SHROOM4  | 0.199 |
| 6.10E-19 | 0.555088 | 0.428 | 0.201 | 9.59E-15 | 0 DOCK9    | 0.227 |
| 6.17E-19 | 0.571295 | 0.485 | 0.253 | 9.71E-15 | 0 NPDC1    | 0.232 |
| 6.28E-19 | 0.632374 | 0.26  | 0.074 | 9.88E-15 | 0 CA2      | 0.186 |
| 6.92E-19 | 0.541414 | 0.423 | 0.194 | 1.09E-14 | 0 CDC42EP3 | 0.229 |
| 1.00E-18 | 0.526063 | 0.302 | 0.101 | 1.58E-14 | 0 GFOD1    | 0.201 |
| 1.13E-18 | 0.578164 | 0.332 | 0.129 | 1.77E-14 | 0 RAPGEF1  | 0.203 |
| 1.23E-18 | 0.571152 | 0.537 | 0.306 | 1.94E-14 | 0 PRCP     | 0.231 |
| 1.32E-18 | 0.537069 | 0.428 | 0.21  | 2.07E-14 | 0 FDPS     | 0.218 |
| 2.03E-18 | 0.607064 | 0.594 | 0.381 | 3.19E-14 | 0 IFI6     | 0.213 |
| 2.13E-18 | 0.563919 | 0.282 | 0.093 | 3.35E-14 | 0 GRASP    | 0.189 |
| 2.32E-18 | 0.516217 | 0.307 | 0.107 | 3.65E-14 | 0 RAPGEF3  | 0.2   |
| 3.37E-18 | 0.564515 | 0.438 | 0.228 | 5.30E-14 | 0 FKBP1C   | 0.21  |
| 4.65E-18 | 0.592356 | 0.844 | 0.631 | 7.31E-14 | 0 TPM1     | 0.213 |
| 6.96E-18 | 0.545091 | 0.319 | 0.122 | 1.09E-13 | 0 GIMAP8   | 0.197 |
| 7.10E-18 | 0.616705 | 0.48  | 0.26  | 1.12E-13 | 0 KLF4     | 0.22  |
| 8.07E-18 | 0.536194 | 0.574 | 0.36  | 1.27E-13 | 0 ARHGAP29 | 0.214 |
| 8.58E-18 | 0.53132  | 0.386 | 0.174 | 1.35E-13 | 0 FRY      | 0.212 |
| 1.07E-17 | 0.500883 | 0.384 | 0.165 | 1.68E-13 | 0 OCIAD2   | 0.219 |
| 1.17E-17 | 0.505693 | 0.255 | 0.076 | 1.84E-13 | 0 FAM212A  | 0.179 |
| 1.92E-17 | 0.590478 | 0.418 | 0.2   | 3.01E-13 | 0 SMTN     | 0.218 |
| 4.43E-17 | 0.501985 | 0.403 | 0.187 | 6.97E-13 | 0 CDC42EP4 | 0.216 |
| 5.21E-17 | 0.553451 | 0.522 | 0.328 | 8.20E-13 | 0 UBE2L6   | 0.194 |
| 5.55E-17 | 0.523817 | 0.428 | 0.212 | 8.72E-13 | 0 ECE1     | 0.216 |
| 8.66E-17 | 0.552275 | 0.55  | 0.35  | 1.36E-12 | 0 LSM6     | 0.2   |
| 1.14E-16 | 0.710466 | 0.389 | 0.184 | 1.79E-12 | 0 HEY1     | 0.205 |
| 1.58E-16 | 0.552348 | 0.421 | 0.215 | 2.48E-12 | 0 CSRNP1   | 0.206 |
| 1.98E-16 | 0.509346 | 0.27  | 0.091 | 3.11E-12 | 0 FZD6     | 0.179 |
| 2.58E-16 | 0.56617  | 0.349 | 0.156 | 4.05E-12 | 0 GBP4     | 0.193 |
| 5.16E-16 | 0.526447 | 0.257 | 0.085 | 8.12E-12 | 0 KIAA1217 | 0.172 |

|           |          |       |       |           |            |       |
|-----------|----------|-------|-------|-----------|------------|-------|
| 5.17E-16  | 0.689206 | 0.389 | 0.187 | 8.13E-12  | 0 EDNRB    | 0.202 |
| 7.25E-16  | 0.500108 | 0.411 | 0.206 | 1.14E-11  | 0 SOCS2    | 0.205 |
| 7.92E-16  | 0.517001 | 0.252 | 0.084 | 1.25E-11  | 0 SHANK3   | 0.168 |
| 1.48E-15  | 0.548077 | 0.349 | 0.151 | 2.33E-11  | 0 NES      | 0.198 |
| 2.25E-15  | 0.514465 | 0.473 | 0.275 | 3.54E-11  | 0 FOXN3    | 0.198 |
| 2.77E-15  | 0.546758 | 0.443 | 0.25  | 4.36E-11  | 0 C1orf21  | 0.193 |
| 2.90E-15  | 0.512577 | 0.522 | 0.329 | 4.56E-11  | 0 TNS2     | 0.193 |
| 1.09E-14  | 0.507641 | 0.361 | 0.168 | 1.71E-10  | 0 FSCN1    | 0.193 |
| 2.52E-14  | 0.769928 | 0.629 | 0.435 | 3.96E-10  | 0 CXCL12   | 0.194 |
| 9.07E-14  | 0.556401 | 0.436 | 0.254 | 1.43E-09  | 0 RDX      | 0.182 |
| 1.90E-13  | 0.58581  | 0.483 | 0.319 | 2.99E-09  | 0 PPA1     | 0.164 |
| 3.80E-13  | 0.541692 | 0.339 | 0.162 | 5.97E-09  | 0 INMT     | 0.177 |
| 7.94E-13  | 0.764656 | 0.515 | 0.353 | 1.25E-08  | 0 HSPA1A   | 0.162 |
| 1.62E-12  | 0.501179 | 0.411 | 0.231 | 2.55E-08  | 0 FRYL     | 0.18  |
| 1.51E-11  | 0.527667 | 0.678 | 0.526 | 2.37E-07  | 0 JUN      | 0.152 |
| 2.57E-11  | 0.518289 | 0.339 | 0.162 | 4.04E-07  | 0 CXCL2    | 0.177 |
| 3.94E-11  | 0.555309 | 0.391 | 0.226 | 6.19E-07  | 0 CD320    | 0.165 |
| 7.55E-11  | 0.509611 | 0.354 | 0.203 | 1.19E-06  | 0 IFI44L   | 0.151 |
| 4.77E-07  | 1.493253 | 0.46  | 0.334 | 0.007505  | 0 MYL2     | 0.126 |
| 8.38E-206 | 4.049722 | 0.982 | 0.037 | 1.32E-201 | 1 SERPINF1 | 0.945 |
| 1.86E-204 | 3.810255 | 0.982 | 0.035 | 2.93E-200 | 1 LUM      | 0.947 |
| 5.23E-194 | 3.248615 | 0.969 | 0.053 | 8.23E-190 | 1 CCDC80   | 0.916 |
| 4.28E-192 | 2.503874 | 0.908 | 0.021 | 6.73E-188 | 1 MMP2     | 0.887 |
| 3.87E-188 | 2.68341  | 0.882 | 0.018 | 6.09E-184 | 1 LTBP2    | 0.864 |
| 3.93E-185 | 2.418749 | 0.842 | 0.006 | 6.18E-181 | 1 MFAP5    | 0.836 |
| 4.11E-185 | 2.995247 | 0.921 | 0.037 | 6.46E-181 | 1 MFAP4    | 0.884 |
| 6.74E-178 | 2.753136 | 0.829 | 0.011 | 1.06E-173 | 1 DPT      | 0.818 |
| 3.24E-176 | 3.040946 | 0.921 | 0.057 | 5.09E-172 | 1 PRELP    | 0.864 |
| 2.27E-169 | 2.624915 | 0.803 | 0.013 | 3.57E-165 | 1 PCOLCE2  | 0.79  |
| 1.30E-162 | 2.310461 | 0.833 | 0.034 | 2.04E-158 | 1 FBLN1    | 0.799 |
| 1.61E-162 | 2.232842 | 0.921 | 0.077 | 2.53E-158 | 1 C1S      | 0.844 |
| 1.70E-162 | 1.841431 | 0.763 | 0.007 | 2.67E-158 | 1 CDH19    | 0.756 |
| 4.05E-159 | 2.201994 | 0.807 | 0.029 | 6.37E-155 | 1 FIBIN    | 0.778 |
| 1.87E-158 | 1.849192 | 0.82  | 0.036 | 2.95E-154 | 1 MXRA8    | 0.784 |
| 2.27E-158 | 4.538271 | 1     | 0.202 | 3.58E-154 | 1 DCN      | 0.798 |
| 3.61E-157 | 2.131049 | 0.807 | 0.029 | 5.67E-153 | 1 COL6A3   | 0.778 |
| 4.88E-156 | 2.515541 | 0.86  | 0.055 | 7.68E-152 | 1 COL1A1   | 0.805 |
| 1.11E-154 | 1.773936 | 0.789 | 0.023 | 1.75E-150 | 1 OGN      | 0.766 |
| 2.21E-152 | 1.968347 | 0.868 | 0.064 | 3.48E-148 | 1 LAMA2    | 0.804 |
| 8.62E-152 | 2.756992 | 0.978 | 0.168 | 1.36E-147 | 1 COL1A2   | 0.81  |
| 9.39E-149 | 1.675296 | 0.724 | 0.012 | 1.48E-144 | 1 ABI3BP   | 0.712 |
| 1.07E-147 | 2.027466 | 0.807 | 0.046 | 1.69E-143 | 1 COL8A1   | 0.761 |
| 4.14E-147 | 1.659606 | 0.746 | 0.019 | 6.50E-143 | 1 OMD      | 0.727 |
| 3.59E-145 | 2.477633 | 0.912 | 0.114 | 5.65E-141 | 1 CFH      | 0.798 |
| 4.22E-145 | 1.940571 | 0.829 | 0.064 | 6.63E-141 | 1 PCOLCE   | 0.765 |
| 3.34E-144 | 2.121436 | 0.882 | 0.084 | 5.26E-140 | 1 PTN      | 0.798 |
| 1.03E-138 | 1.817824 | 0.746 | 0.033 | 1.62E-134 | 1 ABCA8    | 0.713 |
| 2.72E-137 | 3.823319 | 0.965 | 0.209 | 4.28E-133 | 1 APOD     | 0.756 |
| 1.31E-136 | 2.016848 | 0.838 | 0.075 | 2.06E-132 | 1 FBLN2    | 0.763 |
| 5.17E-135 | 3.16661  | 0.833 | 0.075 | 8.12E-131 | 1 CFD      | 0.758 |
| 2.53E-134 | 1.43319  | 0.702 | 0.022 | 3.98E-130 | 1 CTSK     | 0.68  |
| 2.62E-132 | 1.63235  | 0.741 | 0.037 | 4.12E-128 | 1 ABCA6    | 0.704 |
| 2.58E-131 | 1.769773 | 0.798 | 0.057 | 4.06E-127 | 1 VCAN     | 0.741 |
| 9.16E-128 | 2.311097 | 0.93  | 0.181 | 1.44E-123 | 1 ASPN     | 0.749 |
| 4.32E-127 | 2.365889 | 0.939 | 0.186 | 6.80E-123 | 1 SERPINE2 | 0.753 |
| 5.26E-125 | 2.305837 | 0.908 | 0.159 | 8.28E-121 | 1 COL3A1   | 0.749 |
| 2.02E-124 | 2.202508 | 0.741 | 0.05  | 3.17E-120 | 1 C7       | 0.691 |
| 1.12E-122 | 2.979743 | 1     | 0.461 | 1.77E-118 | 1 MGP      | 0.539 |

|           |          |       |       |           |            |       |
|-----------|----------|-------|-------|-----------|------------|-------|
| 1.69E-118 | 1.972134 | 0.785 | 0.074 | 2.65E-114 | 1 CTGF     | 0.711 |
| 3.25E-118 | 1.751007 | 0.706 | 0.048 | 5.10E-114 | 1 FBLN5    | 0.658 |
| 1.72E-116 | 2.141857 | 0.57  | 0.006 | 2.70E-112 | 1 SFRP4    | 0.564 |
| 4.08E-116 | 1.470099 | 0.649 | 0.029 | 6.41E-112 | 1 COL12A1  | 0.62  |
| 1.73E-112 | 2.246197 | 0.991 | 0.464 | 2.72E-108 | 1 TIMP1    | 0.527 |
| 9.88E-112 | 1.344545 | 0.601 | 0.018 | 1.55E-107 | 1 SULF1    | 0.583 |
| 3.14E-111 | 1.358353 | 0.588 | 0.018 | 4.93E-107 | 1 OLFML3   | 0.57  |
| 5.97E-111 | 1.960228 | 1     | 0.856 | 9.39E-107 | 1 CST3     | 0.144 |
| 3.05E-108 | 1.707104 | 0.82  | 0.141 | 4.80E-104 | 1 NNMT     | 0.679 |
| 4.23E-108 | 2.383377 | 0.996 | 0.737 | 6.64E-104 | 1 GSN      | 0.259 |
| 1.07E-107 | 1.594717 | 0.697 | 0.067 | 1.69E-103 | 1 C1R      | 0.63  |
| 1.11E-106 | 1.627621 | 0.86  | 0.167 | 1.74E-102 | 1 LRP1     | 0.693 |
| 1.94E-103 | 1.286733 | 0.496 | 0.001 | 3.05E-99  | 1 MEG3     | 0.495 |
| 2.55E-102 | 1.820141 | 0.724 | 0.089 | 4.01E-98  | 1 SCN7A    | 0.635 |
| 1.03E-101 | 1.737391 | 0.882 | 0.234 | 1.62E-97  | 1 FSTL1    | 0.648 |
| 4.93E-101 | 1.647752 | 0.868 | 0.192 | 7.75E-97  | 1 LTBP4    | 0.676 |
| 1.83E-100 | 1.73225  | 0.899 | 0.243 | 2.87E-96  | 1 COL6A1   | 0.656 |
| 7.30E-100 | 1.952314 | 0.627 | 0.048 | 1.15E-95  | 1 FMOD     | 0.579 |
| 6.96E-98  | 1.187231 | 0.531 | 0.016 | 1.10E-93  | 1 PODN     | 0.515 |
| 8.18E-98  | 1.610784 | 0.579 | 0.034 | 1.29E-93  | 1 HTRA3    | 0.545 |
| 4.54E-97  | 1.587224 | 0.868 | 0.251 | 7.14E-93  | 1 PMP22    | 0.617 |
| 6.19E-97  | 2.062616 | 0.675 | 0.076 | 9.74E-93  | 1 AEBP1    | 0.599 |
| 3.15E-96  | 1.510612 | 0.588 | 0.037 | 4.95E-92  | 1 TCF21    | 0.551 |
| 9.76E-96  | 1.419879 | 0.64  | 0.049 | 1.53E-91  | 1 EFEMP1   | 0.591 |
| 4.87E-94  | 1.270517 | 0.662 | 0.071 | 7.67E-90  | 1 LTBP1    | 0.591 |
| 1.44E-93  | 1.457657 | 0.61  | 0.048 | 2.26E-89  | 1 COL14A1  | 0.562 |
| 7.11E-93  | 1.852401 | 0.711 | 0.107 | 1.12E-88  | 1 SMOC2    | 0.604 |
| 1.04E-92  | 1.306185 | 0.526 | 0.023 | 1.64E-88  | 1 PDGFRL   | 0.503 |
| 4.17E-92  | 1.900104 | 0.456 | 0.004 | 6.55E-88  | 1 PENK     | 0.452 |
| 4.52E-92  | 1.432887 | 0.496 | 0.014 | 7.11E-88  | 1 THBS2    | 0.482 |
| 1.54E-91  | 1.124395 | 0.5   | 0.015 | 2.42E-87  | 1 MRC2     | 0.485 |
| 3.71E-90  | 1.067276 | 0.443 | 0.002 | 5.83E-86  | 1 PDGFRA   | 0.441 |
| 4.48E-89  | 1.360374 | 0.943 | 0.223 | 7.05E-85  | 1 S100A4   | 0.72  |
| 5.29E-89  | 1.655486 | 0.956 | 0.513 | 8.32E-85  | 1 SERPING1 | 0.443 |
| 1.13E-87  | 1.316318 | 0.632 | 0.071 | 1.77E-83  | 1 ECM1     | 0.561 |
| 3.63E-86  | 1.580099 | 0.952 | 0.348 | 5.71E-82  | 1 BGN      | 0.604 |
| 6.01E-86  | 1.648418 | 0.917 | 0.425 | 9.46E-82  | 1 COL6A2   | 0.492 |
| 1.11E-85  | 1.107049 | 0.513 | 0.026 | 1.74E-81  | 1 GAS7     | 0.487 |
| 1.70E-85  | 1.163231 | 0.496 | 0.021 | 2.67E-81  | 1 CES1     | 0.475 |
| 1.87E-85  | 1.116443 | 0.447 | 0.009 | 2.94E-81  | 1 SRPX2    | 0.438 |
| 4.00E-85  | 1.367426 | 0.838 | 0.236 | 6.30E-81  | 1 CYBRD1   | 0.602 |
| 6.36E-85  | 1.370017 | 0.882 | 0.29  | 1.00E-80  | 1 TIMP2    | 0.592 |
| 1.61E-84  | 1.554317 | 0.614 | 0.07  | 2.53E-80  | 1 FBN1     | 0.544 |
| 1.80E-83  | 1.192922 | 0.632 | 0.064 | 2.83E-79  | 1 SPON2    | 0.568 |
| 3.32E-83  | 1.271455 | 0.794 | 0.172 | 5.22E-79  | 1 FXYP1    | 0.622 |
| 2.76E-82  | 1.131235 | 0.434 | 0.008 | 4.34E-78  | 1 IGF1     | 0.426 |
| 1.92E-80  | 1.012715 | 0.439 | 0.012 | 3.02E-76  | 1 FAP      | 0.427 |
| 1.92E-79  | 1.158771 | 0.509 | 0.034 | 3.02E-75  | 1 SRPX     | 0.475 |
| 1.95E-78  | 2.38559  | 0.697 | 0.138 | 3.07E-74  | 1 THBS4    | 0.559 |
| 5.15E-78  | 1.73205  | 0.904 | 0.357 | 8.11E-74  | 1 FN1      | 0.547 |
| 2.76E-77  | 1.052131 | 0.443 | 0.016 | 4.34E-73  | 1 CHPF     | 0.427 |
| 1.15E-76  | 1.189305 | 0.689 | 0.133 | 1.80E-72  | 1 RNASE4   | 0.556 |
| 1.50E-75  | 1.10116  | 0.504 | 0.036 | 2.35E-71  | 1 MGST1    | 0.468 |
| 3.84E-75  | 1.067235 | 0.364 | 0     | 6.04E-71  | 1 TLL2     | 0.364 |
| 1.58E-74  | 1.167704 | 0.548 | 0.058 | 2.49E-70  | 1 COL5A2   | 0.49  |
| 2.62E-74  | 1.030797 | 0.43  | 0.018 | 4.12E-70  | 1 ABCA9    | 0.412 |
| 6.80E-74  | 1.045261 | 0.395 | 0.008 | 1.07E-69  | 1 SEMA3C   | 0.387 |
| 9.30E-74  | 1.139754 | 0.675 | 0.117 | 1.46E-69  | 1 ISLR     | 0.558 |

|          |          |       |       |          |             |       |
|----------|----------|-------|-------|----------|-------------|-------|
| 2.23E-73 | 1.386578 | 0.785 | 0.222 | 3.50E-69 | 1 LSP1      | 0.563 |
| 1.49E-72 | 1.030061 | 0.443 | 0.025 | 2.34E-68 | 1 CERCAM    | 0.418 |
| 7.82E-72 | 1.393627 | 0.759 | 0.193 | 1.23E-67 | 1 TNXB      | 0.566 |
| 7.97E-72 | 1.084281 | 0.461 | 0.03  | 1.25E-67 | 1 SDC2      | 0.431 |
| 3.00E-71 | 2.370863 | 0.557 | 0.069 | 4.71E-67 | 1 POSTN     | 0.488 |
| 1.23E-70 | 1.405499 | 0.368 | 0.006 | 1.93E-66 | 1 C3        | 0.362 |
| 2.11E-70 | 0.931569 | 0.342 | 0     | 3.31E-66 | 1 MOXD1     | 0.342 |
| 6.67E-70 | 1.057318 | 0.496 | 0.043 | 1.05E-65 | 1 PTGIS     | 0.453 |
| 2.32E-69 | 0.822439 | 0.368 | 0.007 | 3.65E-65 | 1 NEGR1     | 0.361 |
| 3.34E-69 | 1.153943 | 0.697 | 0.143 | 5.25E-65 | 1 PDLIM3    | 0.554 |
| 1.67E-68 | 0.831484 | 0.425 | 0.025 | 2.62E-64 | 1 GLT8D2    | 0.4   |
| 5.99E-68 | 0.957036 | 0.478 | 0.042 | 9.43E-64 | 1 RCN3      | 0.436 |
| 1.60E-67 | 1.103469 | 1     | 0.839 | 2.52E-63 | 1 S100A6    | 0.161 |
| 2.16E-67 | 0.822328 | 0.333 | 0.001 | 3.40E-63 | 1 PCSK6     | 0.332 |
| 5.09E-66 | 1.160461 | 0.956 | 0.581 | 8.00E-62 | 1 PLAC9     | 0.375 |
| 1.15E-65 | 1.318055 | 0.697 | 0.182 | 1.81E-61 | 1 F2R       | 0.515 |
| 1.43E-65 | 2.084615 | 0.439 | 0.034 | 2.25E-61 | 1 PI16      | 0.405 |
| 3.90E-65 | 0.896571 | 0.364 | 0.011 | 6.14E-61 | 1 SVEP1     | 0.353 |
| 2.24E-64 | 1.23246  | 0.636 | 0.132 | 3.53E-60 | 1 FHL2      | 0.504 |
| 4.69E-64 | 0.877736 | 0.355 | 0.009 | 7.38E-60 | 1 LOXL1     | 0.346 |
| 2.84E-63 | 2.14915  | 0.662 | 0.173 | 4.47E-59 | 1 IGFBP6    | 0.489 |
| 1.74E-61 | 1.016976 | 0.368 | 0.018 | 2.74E-57 | 1 DIO2      | 0.35  |
| 1.79E-61 | 0.76113  | 0.351 | 0.012 | 2.82E-57 | 1 LINC01140 | 0.339 |
| 2.70E-61 | 1.112213 | 0.741 | 0.251 | 4.24E-57 | 1 PRDX4     | 0.49  |
| 1.44E-60 | 1.082302 | 0.307 | 0.002 | 2.27E-56 | 1 MME       | 0.305 |
| 4.01E-60 | 0.981825 | 0.425 | 0.036 | 6.31E-56 | 1 PCDH9     | 0.389 |
| 6.35E-60 | 0.724586 | 0.298 | 0.001 | 9.99E-56 | 1 ANGPTL5   | 0.297 |
| 9.89E-60 | 0.860839 | 0.333 | 0.009 | 1.55E-55 | 1 LOX       | 0.324 |
| 1.15E-59 | 0.854598 | 0.412 | 0.033 | 1.81E-55 | 1 SSPN      | 0.379 |
| 7.87E-59 | 1.088021 | 0.557 | 0.097 | 1.24E-54 | 1 PLTP      | 0.46  |
| 4.57E-58 | 0.792604 | 0.289 | 0.001 | 7.19E-54 | 1 SCARA5    | 0.288 |
| 4.70E-58 | 0.928296 | 0.289 | 0.001 | 7.39E-54 | 1 ABCA10    | 0.288 |
| 1.50E-57 | 0.869872 | 0.482 | 0.064 | 2.36E-53 | 1 TMEM98    | 0.418 |
| 2.93E-57 | 0.706958 | 0.303 | 0.005 | 4.61E-53 | 1 NOX4      | 0.298 |
| 3.43E-57 | 0.812945 | 0.377 | 0.023 | 5.39E-53 | 1 GPNMB     | 0.354 |
| 1.38E-56 | 0.831697 | 0.395 | 0.03  | 2.17E-52 | 1 CDO1      | 0.365 |
| 2.41E-56 | 0.759145 | 0.298 | 0.005 | 3.79E-52 | 1 NRK       | 0.293 |
| 1.40E-55 | 0.87037  | 0.355 | 0.021 | 2.20E-51 | 1 COL5A1    | 0.334 |
| 6.38E-55 | 0.789496 | 0.382 | 0.029 | 1.00E-50 | 1 NT5E      | 0.353 |
| 3.33E-54 | 0.862041 | 0.425 | 0.044 | 5.24E-50 | 1 AKR1C1    | 0.381 |
| 8.89E-53 | 0.616578 | 0.259 | 0     | 1.40E-48 | 1 LPAR1     | 0.259 |
| 7.16E-52 | 1.125574 | 0.772 | 0.313 | 1.13E-47 | 1 FHL1      | 0.459 |
| 7.54E-52 | 0.820464 | 0.439 | 0.058 | 1.19E-47 | 1 KDELR3    | 0.381 |
| 9.46E-52 | 0.674152 | 0.281 | 0.006 | 1.49E-47 | 1 SLIT2     | 0.275 |
| 1.19E-51 | 0.77628  | 1     | 0.942 | 1.87E-47 | 1 VIM       | 0.058 |
| 1.27E-51 | 0.611949 | 0.259 | 0.001 | 1.99E-47 | 1 LRRN4CL   | 0.258 |
| 2.22E-51 | 0.797427 | 0.478 | 0.075 | 3.49E-47 | 1 TMED3     | 0.403 |
| 2.26E-51 | 0.74029  | 0.289 | 0.008 | 3.55E-47 | 1 ADAMTS5   | 0.281 |
| 5.63E-51 | 0.882247 | 0.991 | 0.95  | 8.86E-47 | 1 ITM2B     | 0.041 |
| 7.10E-51 | 0.955052 | 0.605 | 0.153 | 1.12E-46 | 1 RRBP1     | 0.452 |
| 1.37E-50 | 1.012968 | 0.632 | 0.178 | 2.16E-46 | 1 LAMB1     | 0.454 |
| 1.50E-49 | 1.153748 | 0.768 | 0.329 | 2.37E-45 | 1 PLXDC2    | 0.439 |
| 1.51E-49 | 1.000697 | 0.254 | 0.002 | 2.37E-45 | 1 FIGF      | 0.252 |
| 2.05E-49 | 0.816919 | 0.342 | 0.026 | 3.22E-45 | 1 AKR1C2    | 0.316 |
| 1.01E-48 | 0.992942 | 0.794 | 0.435 | 1.59E-44 | 1 ARF4      | 0.359 |
| 2.07E-48 | 0.849672 | 0.417 | 0.056 | 3.25E-44 | 1 ECHDC2    | 0.361 |
| 3.65E-48 | 0.803838 | 0.259 | 0.005 | 5.73E-44 | 1 HAPLN1    | 0.254 |
| 6.80E-48 | 0.668071 | 0.276 | 0.009 | 1.07E-43 | 1 PAMR1     | 0.267 |

|          |          |       |       |          |            |       |
|----------|----------|-------|-------|----------|------------|-------|
| 6.81E-48 | 0.9365   | 0.535 | 0.117 | 1.07E-43 | 1 PHLDB1   | 0.418 |
| 1.17E-47 | 0.793813 | 0.329 | 0.025 | 1.84E-43 | 1 EDIL3    | 0.304 |
| 1.65E-47 | 1.037231 | 0.829 | 0.432 | 2.59E-43 | 1 S100A13  | 0.397 |
| 2.94E-47 | 1.049183 | 0.636 | 0.207 | 4.62E-43 | 1 LAMC1    | 0.429 |
| 2.97E-47 | 0.738538 | 0.285 | 0.012 | 4.67E-43 | 1 TNFAIP6  | 0.273 |
| 4.82E-47 | 0.736445 | 0.263 | 0.007 | 7.58E-43 | 1 PLEKHH2  | 0.256 |
| 1.14E-46 | 0.963701 | 0.618 | 0.183 | 1.80E-42 | 1 PLSCR4   | 0.435 |
| 3.93E-46 | 1.381364 | 0.583 | 0.171 | 6.18E-42 | 1 CYP1B1   | 0.412 |
| 4.07E-46 | 0.878136 | 0.452 | 0.076 | 6.40E-42 | 1 NOTCH2   | 0.376 |
| 1.85E-45 | 0.983361 | 0.886 | 0.64  | 2.91E-41 | 1 ANXA5    | 0.246 |
| 3.47E-45 | 0.760737 | 0.368 | 0.043 | 5.46E-41 | 1 FEZ1     | 0.325 |
| 5.41E-45 | 0.869994 | 0.921 | 0.708 | 8.50E-41 | 1 GABARAPL | 0.213 |
| 1.41E-44 | 0.672266 | 0.329 | 0.029 | 2.22E-40 | 1 ST3GAL4  | 0.3   |
| 4.34E-44 | 0.685993 | 0.544 | 0.125 | 6.83E-40 | 1 ELN      | 0.419 |
| 1.17E-43 | 1.002923 | 0.504 | 0.117 | 1.84E-39 | 1 MXRA5    | 0.387 |
| 1.62E-43 | 0.823972 | 0.724 | 0.258 | 2.54E-39 | 1 TFPI     | 0.466 |
| 1.82E-43 | 1.589428 | 0.355 | 0.043 | 2.87E-39 | 1 ADH1B    | 0.312 |
| 3.72E-43 | 0.845667 | 0.904 | 0.689 | 5.85E-39 | 1 LAPTM4A  | 0.215 |
| 4.85E-43 | 0.812296 | 0.921 | 0.73  | 7.62E-39 | 1 PPIB     | 0.191 |
| 6.10E-43 | 0.754007 | 0.355 | 0.041 | 9.59E-39 | 1 PDGFD    | 0.314 |
| 2.63E-42 | 0.780422 | 0.289 | 0.021 | 4.13E-38 | 1 COL16A1  | 0.268 |
| 2.33E-41 | 0.857321 | 0.921 | 0.813 | 3.66E-37 | 1 TSC22D3  | 0.108 |
| 2.24E-40 | 0.708905 | 0.311 | 0.032 | 3.51E-36 | 1 RHOBTB3  | 0.279 |
| 2.96E-40 | 0.729615 | 0.355 | 0.047 | 4.66E-36 | 1 PRRX1    | 0.308 |
| 2.18E-39 | 0.608878 | 0.364 | 0.053 | 3.43E-35 | 1 ANG      | 0.311 |
| 2.22E-39 | 0.830766 | 0.732 | 0.356 | 3.49E-35 | 1 DDAH2    | 0.376 |
| 2.02E-38 | 0.995698 | 0.522 | 0.15  | 3.18E-34 | 1 LTBP3    | 0.372 |
| 4.62E-37 | 0.639837 | 0.259 | 0.019 | 7.27E-33 | 1 OAF      | 0.24  |
| 8.43E-37 | 0.877505 | 0.649 | 0.271 | 1.33E-32 | 1 ADD3     | 0.378 |
| 1.69E-36 | 0.644994 | 0.364 | 0.057 | 2.66E-32 | 1 BMP4     | 0.307 |
| 2.49E-36 | 0.814476 | 0.452 | 0.109 | 3.91E-32 | 1 ANTXR1   | 0.343 |
| 3.47E-36 | 0.803131 | 0.417 | 0.086 | 5.45E-32 | 1 PLXDC1   | 0.331 |
| 3.94E-36 | 0.539099 | 0.276 | 0.026 | 6.20E-32 | 1 FAM110B  | 0.25  |
| 6.60E-36 | 0.868636 | 0.811 | 0.435 | 1.04E-31 | 1 SPRY1    | 0.376 |
| 1.64E-35 | 0.822143 | 0.443 | 0.109 | 2.58E-31 | 1 AKAP12   | 0.334 |
| 6.20E-35 | 0.642148 | 0.342 | 0.056 | 9.75E-31 | 1 FKBP7    | 0.286 |
| 4.66E-33 | 0.688053 | 0.421 | 0.096 | 7.33E-29 | 1 PALLD    | 0.325 |
| 7.20E-33 | 0.68622  | 0.355 | 0.064 | 1.13E-28 | 1 MATN2    | 0.291 |
| 9.76E-33 | 0.698697 | 0.342 | 0.061 | 1.53E-28 | 1 CYP27A1  | 0.281 |
| 2.23E-32 | 0.674664 | 0.873 | 0.636 | 3.50E-28 | 1 SSR4     | 0.237 |
| 3.89E-32 | 0.522855 | 0.276 | 0.034 | 6.12E-28 | 1 FAM92A1  | 0.242 |
| 5.37E-32 | 0.782558 | 0.754 | 0.435 | 8.44E-28 | 1 ARL6IP5  | 0.319 |
| 7.19E-32 | 0.776031 | 0.728 | 0.39  | 1.13E-27 | 1 BNIP3L   | 0.338 |
| 1.73E-31 | 0.512422 | 0.272 | 0.032 | 2.72E-27 | 1 MAMDC2   | 0.24  |
| 2.04E-31 | 0.77718  | 0.702 | 0.326 | 3.20E-27 | 1 EMP1     | 0.376 |
| 2.48E-31 | 0.723292 | 0.838 | 0.46  | 3.90E-27 | 1 MFGE8    | 0.378 |
| 3.69E-31 | 0.664024 | 0.443 | 0.117 | 5.80E-27 | 1 SGCE     | 0.326 |
| 3.80E-31 | 0.606996 | 0.93  | 0.757 | 5.98E-27 | 1 CD63     | 0.173 |
| 2.13E-30 | 0.708958 | 0.68  | 0.308 | 3.35E-26 | 1 NUPR1    | 0.372 |
| 2.46E-30 | 1.202321 | 0.456 | 0.139 | 3.86E-26 | 1 CYR61    | 0.317 |
| 2.98E-30 | 0.653432 | 0.868 | 0.685 | 4.68E-26 | 1 GPX4     | 0.183 |
| 5.35E-30 | 0.658544 | 0.825 | 0.539 | 8.41E-26 | 1 TMED2    | 0.286 |
| 9.93E-30 | 0.821821 | 0.588 | 0.249 | 1.56E-25 | 1 LGALS3BP | 0.339 |
| 1.29E-29 | 0.688201 | 0.294 | 0.048 | 2.02E-25 | 1 CRISPLD2 | 0.246 |
| 1.55E-29 | 0.654794 | 0.338 | 0.067 | 2.44E-25 | 1 GPX8     | 0.271 |
| 1.66E-29 | 0.779015 | 0.368 | 0.085 | 2.61E-25 | 1 SOD3     | 0.283 |
| 3.12E-29 | 0.666773 | 0.794 | 0.491 | 4.91E-25 | 1 PEBP1    | 0.303 |
| 5.32E-29 | 0.762627 | 0.487 | 0.162 | 8.36E-25 | 1 SCPEP1   | 0.325 |



|          |          |       |       |          |            |       |
|----------|----------|-------|-------|----------|------------|-------|
| 6.53E-29 | 0.554419 | 0.285 | 0.043 | 1.03E-24 | 1 EPHA3    | 0.242 |
| 8.66E-29 | 0.730109 | 0.518 | 0.188 | 1.36E-24 | 1 GOLIM4   | 0.33  |
| 1.46E-28 | 0.635289 | 0.377 | 0.083 | 2.30E-24 | 1 CKB      | 0.294 |
| 1.78E-28 | 0.816213 | 0.487 | 0.158 | 2.80E-24 | 1 FRZB     | 0.329 |
| 2.51E-28 | 0.628728 | 0.36  | 0.082 | 3.94E-24 | 1 ECM2     | 0.278 |
| 3.00E-28 | 0.622977 | 0.342 | 0.076 | 4.73E-24 | 1 PLBD1    | 0.266 |
| 3.35E-28 | 0.755971 | 0.504 | 0.185 | 5.27E-24 | 1 ANXA4    | 0.319 |
| 7.10E-28 | 0.712572 | 0.561 | 0.232 | 1.12E-23 | 1 EFEMP2   | 0.329 |
| 2.06E-27 | 0.845595 | 0.605 | 0.28  | 3.25E-23 | 1 RP11-14N | 0.325 |
| 2.65E-27 | 0.629663 | 0.316 | 0.06  | 4.17E-23 | 1 THBS1    | 0.256 |
| 7.40E-27 | 0.5228   | 0.276 | 0.047 | 1.16E-22 | 1 PLEKHA5  | 0.229 |
| 7.87E-27 | 0.647655 | 0.689 | 0.366 | 1.24E-22 | 1 PLD3     | 0.323 |
| 9.15E-27 | 0.678152 | 0.781 | 0.5   | 1.44E-22 | 1 ANXA1    | 0.281 |
| 9.29E-27 | 0.618699 | 0.825 | 0.586 | 1.46E-22 | 1 CSTB     | 0.239 |
| 1.84E-26 | 0.696781 | 0.711 | 0.401 | 2.89E-22 | 1 MYDGF    | 0.31  |
| 4.54E-26 | 0.68939  | 0.553 | 0.221 | 7.14E-22 | 1 PLP2     | 0.332 |
| 4.66E-26 | 0.517316 | 0.868 | 0.533 | 7.33E-22 | 1 LHFP     | 0.335 |
| 1.21E-25 | 0.609423 | 0.855 | 0.626 | 1.90E-21 | 1 PSAP     | 0.229 |
| 1.41E-24 | 0.542964 | 0.303 | 0.064 | 2.22E-20 | 1 SH3D19   | 0.239 |
| 1.44E-24 | 0.554969 | 0.952 | 0.69  | 2.27E-20 | 1 SPARC    | 0.262 |
| 1.60E-24 | 0.697125 | 0.386 | 0.109 | 2.52E-20 | 1 ITIH5    | 0.277 |
| 7.84E-24 | 0.561162 | 0.268 | 0.05  | 1.23E-19 | 1 TGFBR1   | 0.218 |
| 1.25E-23 | 0.624171 | 0.469 | 0.178 | 1.97E-19 | 1 CPQ      | 0.291 |
| 1.50E-23 | 0.530519 | 0.333 | 0.084 | 2.35E-19 | 1 UBE2E2   | 0.249 |
| 2.84E-23 | 0.653225 | 0.531 | 0.231 | 4.47E-19 | 1 NFIC     | 0.3   |
| 7.77E-23 | 0.55933  | 0.417 | 0.137 | 1.22E-18 | 1 C5orf15  | 0.28  |
| 9.67E-23 | 0.675254 | 0.575 | 0.282 | 1.52E-18 | 1 CALU     | 0.293 |
| 1.47E-22 | 0.584532 | 0.263 | 0.053 | 2.31E-18 | 1 UAP1     | 0.21  |
| 1.50E-22 | 0.549208 | 0.491 | 0.181 | 2.37E-18 | 1 CLU      | 0.31  |
| 1.52E-22 | 0.526228 | 0.272 | 0.055 | 2.39E-18 | 1 FAM46A   | 0.217 |
| 1.61E-22 | 0.507308 | 0.947 | 0.86  | 2.53E-18 | 1 CD99     | 0.087 |
| 2.25E-22 | 0.595074 | 0.303 | 0.072 | 3.53E-18 | 1 PDE5A    | 0.231 |
| 3.14E-22 | 0.823054 | 0.544 | 0.232 | 4.94E-18 | 1 C10orf10 | 0.312 |
| 4.40E-22 | 0.555173 | 0.377 | 0.111 | 6.93E-18 | 1 HEYL     | 0.266 |
| 4.57E-22 | 0.567032 | 0.333 | 0.089 | 7.19E-18 | 1 ARL4D    | 0.244 |
| 5.37E-22 | 0.531201 | 0.338 | 0.095 | 8.45E-18 | 1 TP53I13  | 0.243 |
| 6.41E-22 | 0.551332 | 0.355 | 0.105 | 1.01E-17 | 1 CDC42EP2 | 0.25  |
| 9.86E-22 | 0.524399 | 0.311 | 0.078 | 1.55E-17 | 1 ERFF1    | 0.233 |
| 1.40E-21 | 0.523085 | 0.346 | 0.1   | 2.20E-17 | 1 PKD2     | 0.246 |
| 2.55E-21 | 0.525301 | 0.351 | 0.1   | 4.01E-17 | 1 RERG     | 0.251 |
| 2.60E-21 | 0.60022  | 0.368 | 0.114 | 4.09E-17 | 1 MYH10    | 0.254 |
| 2.94E-21 | 0.624887 | 0.785 | 0.598 | 4.62E-17 | 1 LDHA     | 0.187 |
| 3.52E-21 | 0.558178 | 0.307 | 0.078 | 5.54E-17 | 1 SYTL2    | 0.229 |
| 4.89E-21 | 0.62557  | 0.417 | 0.15  | 7.70E-17 | 1 DPYSL3   | 0.267 |
| 5.68E-21 | 0.601601 | 0.316 | 0.089 | 8.93E-17 | 1 FAM114A1 | 0.227 |
| 1.14E-20 | 0.59247  | 0.276 | 0.065 | 1.79E-16 | 1 ETV1     | 0.211 |
| 1.18E-20 | 0.643453 | 0.658 | 0.4   | 1.86E-16 | 1 P4HB     | 0.258 |
| 1.28E-20 | 0.552014 | 0.544 | 0.242 | 2.02E-16 | 1 IL33     | 0.302 |
| 1.32E-20 | 0.59154  | 0.649 | 0.371 | 2.07E-16 | 1 CNIH1    | 0.278 |
| 7.72E-20 | 0.577708 | 0.526 | 0.246 | 1.21E-15 | 1 YIF1A    | 0.28  |
| 9.78E-20 | 0.579691 | 0.404 | 0.145 | 1.54E-15 | 1 PRNP     | 0.259 |
| 3.02E-19 | 0.6764   | 0.649 | 0.36  | 4.75E-15 | 1 COL15A1  | 0.289 |
| 3.11E-19 | 0.599333 | 0.395 | 0.145 | 4.90E-15 | 1 P4HA1    | 0.25  |
| 3.57E-19 | 0.548132 | 0.386 | 0.138 | 5.62E-15 | 1 LMO4     | 0.248 |
| 5.25E-19 | 0.527106 | 0.684 | 0.423 | 8.25E-15 | 1 RNH1     | 0.261 |
| 1.45E-18 | 0.599276 | 0.61  | 0.359 | 2.28E-14 | 1 KDELR2   | 0.251 |
| 1.76E-18 | 0.596483 | 0.654 | 0.417 | 2.77E-14 | 1 ATRAID   | 0.237 |
| 4.08E-18 | 0.883948 | 0.333 | 0.111 | 6.42E-14 | 1 IGFBP3   | 0.222 |

|          |          |       |       |          |            |       |
|----------|----------|-------|-------|----------|------------|-------|
| 4.50E-18 | 0.534717 | 0.276 | 0.074 | 7.08E-14 | 1 CTSF     | 0.202 |
| 4.54E-18 | 0.5675   | 0.482 | 0.223 | 7.13E-14 | 1 RAB34    | 0.259 |
| 4.71E-18 | 0.537579 | 0.303 | 0.091 | 7.41E-14 | 1 NTN4     | 0.212 |
| 4.78E-18 | 0.519404 | 0.272 | 0.072 | 7.52E-14 | 1 C1GALT1C | 0.2   |
| 5.54E-18 | 0.555752 | 0.675 | 0.4   | 8.71E-14 | 1 TMED10   | 0.275 |
| 1.05E-17 | 0.599406 | 0.605 | 0.338 | 1.64E-13 | 1 H2AFJ    | 0.267 |
| 1.68E-17 | 0.505822 | 0.272 | 0.075 | 2.64E-13 | 1 SPRY2    | 0.197 |
| 1.87E-17 | 0.587122 | 0.342 | 0.12  | 2.95E-13 | 1 RORA     | 0.222 |
| 2.29E-17 | 0.629639 | 0.294 | 0.086 | 3.60E-13 | 1 SERPINE1 | 0.208 |
| 2.46E-17 | 0.519255 | 0.421 | 0.174 | 3.88E-13 | 1 IAH1     | 0.247 |
| 3.64E-17 | 0.535625 | 0.618 | 0.335 | 5.72E-13 | 1 FAM198B  | 0.283 |
| 4.15E-17 | 0.546433 | 0.338 | 0.114 | 6.53E-13 | 1 C1QTNF2  | 0.224 |
| 6.35E-17 | 0.529857 | 0.618 | 0.356 | 9.99E-13 | 1 DST      | 0.262 |
| 6.86E-17 | 0.563146 | 0.496 | 0.241 | 1.08E-12 | 1 ERLEC1   | 0.255 |
| 1.19E-16 | 0.500072 | 0.281 | 0.083 | 1.87E-12 | 1 CLEC11A  | 0.198 |
| 3.19E-16 | 0.544151 | 0.425 | 0.188 | 5.02E-12 | 1 TMEM43   | 0.237 |
| 3.95E-16 | 0.530182 | 0.592 | 0.328 | 6.21E-12 | 1 IDS      | 0.264 |
| 7.07E-16 | 0.510122 | 0.478 | 0.237 | 1.11E-11 | 1 ZBTB20   | 0.241 |
| 8.63E-16 | 0.531487 | 0.439 | 0.202 | 1.36E-11 | 1 NID1     | 0.237 |
| 1.28E-15 | 0.575126 | 0.408 | 0.181 | 2.01E-11 | 1 SLC29A1  | 0.227 |
| 1.89E-15 | 0.525719 | 0.417 | 0.187 | 2.97E-11 | 1 PLAGL1   | 0.23  |
| 4.59E-15 | 0.632946 | 0.675 | 0.502 | 7.23E-11 | 1 BTG2     | 0.173 |
| 4.80E-15 | 0.534241 | 0.329 | 0.125 | 7.54E-11 | 1 PBX1     | 0.204 |
| 6.38E-15 | 0.582762 | 0.469 | 0.225 | 1.00E-10 | 1 COL18A1  | 0.244 |
| 7.11E-15 | 0.530759 | 0.5   | 0.273 | 1.12E-10 | 1 SEC13    | 0.227 |
| 1.35E-14 | 0.529939 | 0.487 | 0.249 | 2.13E-10 | 1 PAM      | 0.238 |
| 1.91E-14 | 0.50457  | 0.605 | 0.376 | 3.01E-10 | 1 LMNA     | 0.229 |
| 2.34E-14 | 0.522564 | 0.671 | 0.445 | 3.69E-10 | 1 EMP3     | 0.226 |
| 2.82E-14 | 0.518537 | 0.504 | 0.275 | 4.44E-10 | 1 HDLBP    | 0.229 |
| 4.93E-14 | 0.527121 | 0.399 | 0.182 | 7.75E-10 | 1 PLOD1    | 0.217 |
| 1.05E-13 | 0.50483  | 0.395 | 0.182 | 1.65E-09 | 1 OAT      | 0.213 |
| 1.48E-13 | 0.5065   | 0.531 | 0.313 | 2.33E-09 | 1 MPG      | 0.218 |
| 2.29E-13 | 0.516801 | 0.491 | 0.269 | 3.60E-09 | 1 TMEM167A | 0.222 |
| 2.33E-13 | 0.560312 | 0.368 | 0.159 | 3.67E-09 | 1 CD55     | 0.209 |
| 5.75E-13 | 0.551366 | 0.623 | 0.458 | 9.05E-09 | 1 OSTC     | 0.165 |
| 1.25E-12 | 0.518304 | 0.452 | 0.244 | 1.96E-08 | 1 PIGT     | 0.208 |
| 3.06E-12 | 0.546345 | 0.496 | 0.284 | 4.81E-08 | 1 ADI1     | 0.212 |
| 3.65E-12 | 0.509416 | 0.404 | 0.207 | 5.74E-08 | 1 FNDC3B   | 0.197 |
| 3.93E-12 | 0.617451 | 0.412 | 0.224 | 6.18E-08 | 1 MDK      | 0.188 |
| 5.91E-12 | 0.507426 | 0.316 | 0.134 | 9.30E-08 | 1 ATP10D   | 0.182 |
| 8.41E-12 | 0.520613 | 0.627 | 0.449 | 1.32E-07 | 1 TUBA1A   | 0.178 |
| 1.57E-09 | 0.552567 | 0.368 | 0.194 | 2.46E-05 | 1 PRSS23   | 0.174 |
| 2.25E-07 | 0.519654 | 0.575 | 0.412 | 0.003535 | 1 IGFBP5   | 0.163 |
| 2.19E-96 | 2.819959 | 0.871 | 0.151 | 3.44E-92 | 2 ACTA2    | 0.72  |
| 1.44E-84 | 2.896072 | 1     | 0.441 | 2.26E-80 | 2 MYL9     | 0.559 |
| 1.18E-81 | 1.756319 | 0.758 | 0.113 | 1.85E-77 | 2 NOTCH3   | 0.645 |
| 1.74E-80 | 2.527826 | 0.485 | 0.021 | 2.73E-76 | 2 MYH11    | 0.464 |
| 4.33E-79 | 1.478547 | 0.432 | 0.012 | 6.81E-75 | 2 RERGL    | 0.42  |
| 5.06E-76 | 1.836861 | 0.886 | 0.229 | 7.95E-72 | 2 ISYNA1   | 0.657 |
| 5.77E-72 | 2.618786 | 0.917 | 0.315 | 9.07E-68 | 2 TPM2     | 0.602 |
| 9.40E-72 | 1.198806 | 0.553 | 0.049 | 1.48E-67 | 2 ITGA7    | 0.504 |
| 1.02E-65 | 1.554648 | 0.432 | 0.024 | 1.60E-61 | 2 CNN1     | 0.408 |
| 1.54E-65 | 1.859329 | 0.795 | 0.171 | 2.42E-61 | 2 AGT      | 0.624 |
| 2.34E-64 | 1.336853 | 0.591 | 0.077 | 3.68E-60 | 2 MYLK     | 0.514 |
| 8.77E-63 | 1.545003 | 0.75  | 0.17  | 1.38E-58 | 2 MTHFD2   | 0.58  |
| 9.74E-63 | 1.394967 | 0.735 | 0.14  | 1.53E-58 | 2 PDGFRB   | 0.595 |
| 6.33E-62 | 1.455865 | 0.985 | 0.613 | 9.96E-58 | 2 CALD1    | 0.372 |
| 1.06E-61 | 1.765649 | 0.78  | 0.181 | 1.66E-57 | 2 GJA4     | 0.599 |

|          |          |       |       |          |            |       |
|----------|----------|-------|-------|----------|------------|-------|
| 2.01E-61 | 1.70892  | 0.811 | 0.207 | 3.16E-57 | 2 COX4I2   | 0.604 |
| 9.25E-60 | 2.164847 | 0.932 | 0.455 | 1.46E-55 | 2 ADIRF    | 0.477 |
| 1.28E-58 | 1.647521 | 0.53  | 0.063 | 2.01E-54 | 2 PLN      | 0.467 |
| 9.65E-55 | 2.939114 | 0.848 | 0.313 | 1.52E-50 | 2 TAGLN    | 0.535 |
| 1.29E-53 | 1.300438 | 0.462 | 0.05  | 2.02E-49 | 2 LMOD1    | 0.412 |
| 1.27E-51 | 0.863476 | 0.303 | 0.011 | 2.00E-47 | 2 KCNMB1   | 0.292 |
| 4.82E-50 | 1.130708 | 0.348 | 0.022 | 7.59E-46 | 2 CASQ2    | 0.326 |
| 1.73E-49 | 0.92674  | 0.394 | 0.034 | 2.71E-45 | 2 MRVI1    | 0.36  |
| 6.95E-49 | 0.730623 | 0.318 | 0.016 | 1.09E-44 | 2 CCDC3    | 0.302 |
| 1.45E-48 | 1.731013 | 0.879 | 0.417 | 2.28E-44 | 2 NDUFA4L2 | 0.462 |
| 1.05E-47 | 0.957758 | 0.424 | 0.046 | 1.65E-43 | 2 ATP1A2   | 0.378 |
| 1.06E-47 | 1.313279 | 0.644 | 0.148 | 1.67E-43 | 2 MCAM     | 0.496 |
| 1.13E-46 | 1.135162 | 0.962 | 0.699 | 1.78E-42 | 2 MGST3    | 0.263 |
| 2.68E-46 | 1.158129 | 0.561 | 0.107 | 4.22E-42 | 2 C1QTNF1  | 0.454 |
| 3.26E-45 | 0.991061 | 0.538 | 0.095 | 5.12E-41 | 2 EDNRA    | 0.443 |
| 7.47E-45 | 1.359119 | 0.621 | 0.148 | 1.18E-40 | 2 PLA2G5   | 0.473 |
| 8.18E-44 | 1.317747 | 0.644 | 0.172 | 1.29E-39 | 2 CSRP2    | 0.472 |
| 2.52E-43 | 1.253876 | 0.568 | 0.118 | 3.97E-39 | 2 FAM162B  | 0.45  |
| 3.21E-42 | 1.101387 | 0.621 | 0.159 | 5.05E-38 | 2 GUCY1A3  | 0.462 |
| 1.08E-41 | 0.960651 | 0.439 | 0.064 | 1.70E-37 | 2 ATP1B2   | 0.375 |
| 1.95E-41 | 0.719831 | 0.273 | 0.014 | 3.06E-37 | 2 SGCA     | 0.259 |
| 4.62E-41 | 1.213559 | 0.924 | 0.486 | 7.27E-37 | 2 MFGE8    | 0.438 |
| 5.02E-41 | 0.980701 | 0.977 | 0.661 | 7.90E-37 | 2 IGFBP7   | 0.316 |
| 1.33E-39 | 1.268129 | 0.606 | 0.153 | 2.09E-35 | 2 CPE      | 0.453 |
| 2.47E-39 | 0.689596 | 0.288 | 0.02  | 3.89E-35 | 2 RASL12   | 0.268 |
| 3.85E-39 | 1.171727 | 0.705 | 0.237 | 6.05E-35 | 2 TGFB1I1  | 0.468 |
| 1.50E-38 | 0.919495 | 0.364 | 0.043 | 2.36E-34 | 2 AOC3     | 0.321 |
| 1.83E-38 | 0.834879 | 0.326 | 0.032 | 2.88E-34 | 2 RCAN2    | 0.294 |
| 3.01E-37 | 1.732194 | 0.909 | 0.68  | 4.73E-33 | 2 DSTN     | 0.229 |
| 3.80E-37 | 0.901804 | 0.356 | 0.043 | 5.97E-33 | 2 RASL11A  | 0.313 |
| 1.67E-36 | 1.073871 | 0.424 | 0.069 | 2.63E-32 | 2 EGFLAM   | 0.355 |
| 2.04E-36 | 1.148498 | 0.652 | 0.206 | 3.20E-32 | 2 4-Sep    | 0.446 |
| 2.77E-36 | 0.645955 | 0.992 | 0.967 | 4.36E-32 | 2 GAPDH    | 0.025 |
| 6.20E-36 | 0.960197 | 0.424 | 0.072 | 9.75E-32 | 2 KLHL23   | 0.352 |
| 6.64E-36 | 1.06992  | 0.591 | 0.167 | 1.04E-31 | 2 NR2F2    | 0.424 |
| 1.01E-34 | 1.136004 | 0.583 | 0.167 | 1.59E-30 | 2 GUCY1B3  | 0.416 |
| 1.62E-34 | 1.476219 | 0.765 | 0.392 | 2.54E-30 | 2 FLNA     | 0.373 |
| 5.69E-34 | 1.651149 | 0.652 | 0.231 | 8.95E-30 | 2 HIGD1B   | 0.421 |
| 3.61E-33 | 1.029766 | 0.886 | 0.464 | 5.67E-29 | 2 PPP1R14A | 0.422 |
| 3.92E-33 | 1.571804 | 0.886 | 0.503 | 6.17E-29 | 2 RGS5     | 0.383 |
| 4.02E-33 | 1.147558 | 0.735 | 0.29  | 6.32E-29 | 2 EPS8     | 0.445 |
| 6.96E-33 | 0.867483 | 0.356 | 0.049 | 1.09E-28 | 2 NTRK2    | 0.307 |
| 9.70E-33 | 1.086699 | 0.689 | 0.258 | 1.53E-28 | 2 MAP1B    | 0.431 |
| 1.03E-32 | 0.878892 | 0.977 | 0.973 | 1.62E-28 | 2 MYL6     | 0.004 |
| 3.24E-32 | 1.063652 | 0.5   | 0.119 | 5.10E-28 | 2 GEM      | 0.381 |
| 5.58E-32 | 0.719528 | 0.273 | 0.026 | 8.78E-28 | 2 TBX2     | 0.247 |
| 6.84E-32 | 0.650209 | 0.258 | 0.022 | 1.08E-27 | 2 CARMN    | 0.236 |
| 1.37E-31 | 0.780433 | 0.939 | 0.767 | 2.16E-27 | 2 COX6A1   | 0.172 |
| 3.90E-31 | 0.634514 | 1     | 0.982 | 6.13E-27 | 2 ACTB     | 0.018 |
| 8.95E-31 | 1.11955  | 0.462 | 0.108 | 1.41E-26 | 2 C2orf40  | 0.354 |
| 9.40E-31 | 0.97587  | 0.318 | 0.043 | 1.48E-26 | 2 FOXS1    | 0.275 |
| 9.52E-31 | 1.14418  | 0.909 | 0.561 | 1.50E-26 | 2 LHFP     | 0.348 |
| 1.14E-30 | 1.056292 | 0.924 | 0.637 | 1.79E-26 | 2 SELM     | 0.287 |
| 7.70E-30 | 1.647851 | 0.424 | 0.097 | 1.21E-25 | 2 SORBS2   | 0.327 |
| 2.01E-29 | 0.841802 | 0.917 | 0.835 | 3.16E-25 | 2 CALM2    | 0.082 |
| 3.11E-29 | 1.029272 | 0.538 | 0.169 | 4.90E-25 | 2 PACSIN2  | 0.369 |
| 1.92E-28 | 0.68439  | 0.288 | 0.037 | 3.02E-24 | 2 S1PR3    | 0.251 |
| 2.13E-28 | 0.873995 | 0.409 | 0.086 | 3.35E-24 | 2 KCNAB1   | 0.323 |

|          |          |       |       |          |            |       |
|----------|----------|-------|-------|----------|------------|-------|
| 2.38E-28 | 0.774269 | 0.333 | 0.054 | 3.74E-24 | 2 RBPMS2   | 0.279 |
| 4.14E-28 | 0.893879 | 0.341 | 0.056 | 6.50E-24 | 2 PPP1R12B | 0.285 |
| 6.91E-28 | 0.681764 | 0.303 | 0.043 | 1.09E-23 | 2 GJC1     | 0.26  |
| 1.34E-27 | 0.7957   | 0.364 | 0.067 | 2.10E-23 | 2 ANO1     | 0.297 |
| 2.00E-27 | 0.747705 | 0.644 | 0.264 | 3.15E-23 | 2 CRYAB    | 0.38  |
| 2.76E-27 | 0.883609 | 0.424 | 0.1   | 4.34E-23 | 2 RARRES2  | 0.324 |
| 3.08E-27 | 0.813962 | 0.356 | 0.064 | 4.84E-23 | 2 HSPB8    | 0.292 |
| 3.97E-27 | 0.865458 | 0.909 | 0.609 | 6.24E-23 | 2 7-Sep    | 0.3   |
| 8.48E-27 | 0.802861 | 0.811 | 0.537 | 1.33E-22 | 2 NDUFB7   | 0.274 |
| 1.19E-26 | 1.581482 | 0.485 | 0.14  | 1.88E-22 | 2 HSPB6    | 0.345 |
| 1.49E-26 | 0.88301  | 0.295 | 0.044 | 2.34E-22 | 2 KCNE4    | 0.251 |
| 1.55E-26 | 1.451433 | 0.455 | 0.126 | 2.44E-22 | 2 ABCC9    | 0.329 |
| 3.58E-26 | 0.855951 | 0.917 | 0.769 | 5.64E-22 | 2 ALDOA    | 0.148 |
| 9.12E-26 | 0.892205 | 0.386 | 0.087 | 1.43E-21 | 2 MOCS1    | 0.299 |
| 1.37E-25 | 0.869181 | 0.318 | 0.056 | 2.16E-21 | 2 BMP5     | 0.262 |
| 3.13E-25 | 1.047372 | 0.659 | 0.284 | 4.92E-21 | 2 SMIM3    | 0.375 |
| 4.67E-25 | 0.722105 | 0.894 | 0.417 | 7.34E-21 | 2 BGN      | 0.477 |
| 1.60E-24 | 0.790475 | 0.561 | 0.181 | 2.51E-20 | 2 FRZB     | 0.38  |
| 3.09E-24 | 0.946198 | 0.705 | 0.371 | 4.86E-20 | 2 ASAH1    | 0.334 |
| 5.70E-24 | 0.992654 | 0.773 | 0.401 | 8.96E-20 | 2 IGFBP5   | 0.372 |
| 1.09E-23 | 0.641387 | 0.265 | 0.039 | 1.72E-19 | 2 ENPEP    | 0.226 |
| 1.18E-23 | 0.722195 | 0.311 | 0.057 | 1.85E-19 | 2 PGF      | 0.254 |
| 3.25E-23 | 0.725781 | 0.909 | 0.769 | 5.11E-19 | 2 COX5B    | 0.14  |
| 4.49E-23 | 0.801305 | 0.455 | 0.127 | 7.06E-19 | 2 HEYL     | 0.328 |
| 7.93E-23 | 0.624406 | 0.288 | 0.048 | 1.25E-18 | 2 PDE3A    | 0.24  |
| 2.03E-22 | 0.712869 | 0.303 | 0.058 | 3.20E-18 | 2 NFASC    | 0.245 |
| 3.99E-22 | 0.861387 | 0.682 | 0.346 | 6.27E-18 | 2 LPP      | 0.336 |
| 5.12E-22 | 0.59732  | 0.288 | 0.051 | 8.05E-18 | 2 NRGN     | 0.237 |
| 6.86E-22 | 0.734214 | 0.909 | 0.745 | 1.08E-17 | 2 COX7A2   | 0.164 |
| 7.12E-22 | 0.889252 | 0.735 | 0.495 | 1.12E-17 | 2 ARPC1A   | 0.24  |
| 8.62E-22 | 0.845775 | 0.424 | 0.121 | 1.36E-17 | 2 FGF1     | 0.303 |
| 1.05E-21 | 0.710616 | 0.364 | 0.086 | 1.65E-17 | 2 GPRC5C   | 0.278 |
| 3.10E-21 | 0.658842 | 0.326 | 0.071 | 4.88E-17 | 2 EFHD1    | 0.255 |
| 5.43E-21 | 0.776822 | 0.288 | 0.057 | 8.54E-17 | 2 FHL5     | 0.231 |
| 6.26E-21 | 0.593881 | 0.909 | 0.659 | 9.85E-17 | 2 COX7A1   | 0.25  |
| 6.50E-21 | 0.908635 | 0.977 | 0.809 | 1.02E-16 | 2 MT2A     | 0.168 |
| 6.96E-21 | 0.648015 | 0.939 | 0.835 | 1.09E-16 | 2 SEPW1    | 0.104 |
| 1.40E-20 | 0.806808 | 0.682 | 0.366 | 2.20E-16 | 2 CYSTM1   | 0.316 |
| 2.08E-20 | 0.730225 | 0.394 | 0.108 | 3.27E-16 | 2 NEXN     | 0.286 |
| 3.29E-20 | 0.738392 | 0.682 | 0.346 | 5.18E-16 | 2 NUPR1    | 0.336 |
| 3.41E-20 | 0.750192 | 0.909 | 0.744 | 5.37E-16 | 2 HSPB1    | 0.165 |
| 4.97E-20 | 0.881244 | 0.288 | 0.059 | 7.81E-16 | 2 P2RY14   | 0.229 |
| 1.01E-19 | 0.857365 | 0.333 | 0.083 | 1.58E-15 | 2 GPRIN3   | 0.25  |
| 8.39E-19 | 0.789947 | 0.917 | 0.697 | 1.32E-14 | 2 ITGB1    | 0.22  |
| 8.85E-19 | 0.719693 | 0.871 | 0.708 | 1.39E-14 | 2 TPI1     | 0.163 |
| 9.16E-19 | 0.979877 | 0.523 | 0.229 | 1.44E-14 | 2 PTP4A3   | 0.294 |
| 1.15E-18 | 0.740474 | 0.455 | 0.161 | 1.81E-14 | 2 SYNPO2   | 0.294 |
| 1.77E-18 | 0.640816 | 0.886 | 0.686 | 2.78E-14 | 2 TPM1     | 0.2   |
| 1.84E-18 | 0.662008 | 0.364 | 0.102 | 2.90E-14 | 2 NUDT4    | 0.262 |
| 2.25E-18 | 0.687838 | 0.795 | 0.556 | 3.54E-14 | 2 NDUFB10  | 0.239 |
| 2.53E-18 | 0.609152 | 0.902 | 0.764 | 3.98E-14 | 2 SKP1     | 0.138 |
| 6.73E-18 | 0.745622 | 0.492 | 0.199 | 1.06E-13 | 2 DBNDD2   | 0.293 |
| 6.94E-18 | 0.713683 | 0.788 | 0.575 | 1.09E-13 | 2 COX7B    | 0.213 |
| 7.79E-18 | 0.593347 | 0.28  | 0.062 | 1.22E-13 | 2 PRKG1    | 0.218 |
| 1.28E-17 | 0.80161  | 0.727 | 0.494 | 2.01E-13 | 2 ATP5B    | 0.233 |
| 1.46E-17 | 0.729122 | 0.78  | 0.528 | 2.30E-13 | 2 TSC22D1  | 0.252 |
| 1.74E-17 | 0.745614 | 0.644 | 0.371 | 2.73E-13 | 2 RSU1     | 0.273 |
| 1.75E-17 | 0.613011 | 0.265 | 0.056 | 2.74E-13 | 2 FAT1     | 0.209 |

|          |          |       |       |          |            |       |
|----------|----------|-------|-------|----------|------------|-------|
| 2.67E-17 | 0.779757 | 0.644 | 0.376 | 4.19E-13 | 2 HCFC1R1  | 0.268 |
| 2.96E-17 | 0.84041  | 0.545 | 0.261 | 4.65E-13 | 2 PPP1R12A | 0.284 |
| 6.87E-17 | 1.166821 | 0.326 | 0.095 | 1.08E-12 | 2 KCNJ8    | 0.231 |
| 7.87E-17 | 0.548157 | 0.318 | 0.083 | 1.24E-12 | 2 A1BG     | 0.235 |
| 1.66E-16 | 0.755192 | 0.386 | 0.13  | 2.61E-12 | 2 DTX3     | 0.256 |
| 3.75E-16 | 0.789432 | 0.258 | 0.06  | 5.90E-12 | 2 GPAT2    | 0.198 |
| 4.64E-16 | 0.913267 | 0.508 | 0.236 | 7.30E-12 | 2 LBH      | 0.272 |
| 6.35E-16 | 0.566544 | 0.258 | 0.059 | 9.98E-12 | 2 MSC-AS1  | 0.199 |
| 9.35E-16 | 0.584128 | 0.818 | 0.645 | 1.47E-11 | 2 CD151    | 0.173 |
| 9.91E-16 | 0.567845 | 0.826 | 0.652 | 1.56E-11 | 2 COX8A    | 0.174 |
| 1.77E-15 | 0.68468  | 0.356 | 0.114 | 2.78E-11 | 2 ARHGAP10 | 0.242 |
| 2.26E-15 | 1.144407 | 0.561 | 0.296 | 3.56E-11 | 2 SNCG     | 0.265 |
| 2.96E-15 | 0.611564 | 0.295 | 0.08  | 4.66E-11 | 2 PDE1A    | 0.215 |
| 4.26E-15 | 0.78323  | 0.515 | 0.241 | 6.70E-11 | 2 NDRG2    | 0.274 |
| 5.20E-15 | 0.675472 | 0.447 | 0.178 | 8.18E-11 | 2 VCL      | 0.269 |
| 9.44E-15 | 0.723823 | 0.583 | 0.3   | 1.48E-10 | 2 CRIP1    | 0.283 |
| 1.11E-14 | 0.585881 | 0.265 | 0.068 | 1.74E-10 | 2 NT5DC2   | 0.197 |
| 1.11E-14 | 0.809595 | 0.447 | 0.188 | 1.75E-10 | 2 FAM213A  | 0.259 |
| 1.19E-14 | 0.780854 | 0.614 | 0.34  | 1.86E-10 | 2 SLC38A2  | 0.274 |
| 1.45E-14 | 0.563533 | 0.288 | 0.081 | 2.27E-10 | 2 TESC     | 0.207 |
| 3.33E-14 | 0.776271 | 0.47  | 0.222 | 5.23E-10 | 2 AC013461 | 0.248 |
| 3.88E-14 | 0.645561 | 0.439 | 0.186 | 6.10E-10 | 2 SLC25A4  | 0.253 |
| 3.93E-14 | 0.6869   | 0.538 | 0.277 | 6.18E-10 | 2 PKIG     | 0.261 |
| 4.74E-14 | 0.698707 | 0.402 | 0.153 | 7.46E-10 | 2 DKK3     | 0.249 |
| 5.90E-14 | 0.571726 | 0.848 | 0.659 | 9.28E-10 | 2 ATP5G3   | 0.189 |
| 6.08E-14 | 0.524587 | 0.333 | 0.107 | 9.56E-10 | 2 RASGRP2  | 0.226 |
| 6.63E-14 | 0.734343 | 0.295 | 0.09  | 1.04E-09 | 2 TPPP3    | 0.205 |
| 1.08E-13 | 0.582809 | 0.811 | 0.503 | 1.70E-09 | 2 BCAM     | 0.308 |
| 1.70E-13 | 0.665281 | 0.394 | 0.152 | 2.67E-09 | 2 AK1      | 0.242 |
| 1.81E-13 | 0.579577 | 0.689 | 0.433 | 2.85E-09 | 2 NGFRAP1  | 0.256 |
| 1.83E-13 | 0.704239 | 0.455 | 0.207 | 2.88E-09 | 2 MAPRE2   | 0.248 |
| 1.89E-13 | 0.913445 | 0.341 | 0.118 | 2.97E-09 | 2 CKB      | 0.223 |
| 2.35E-13 | 0.609333 | 0.659 | 0.423 | 3.70E-09 | 2 NDUFA6   | 0.236 |
| 3.41E-13 | 0.638865 | 0.5   | 0.251 | 5.37E-09 | 2 FAM162A  | 0.249 |
| 3.73E-13 | 0.57698  | 0.674 | 0.449 | 5.87E-09 | 2 PRDX2    | 0.225 |
| 3.77E-13 | 0.580918 | 0.417 | 0.171 | 5.93E-09 | 2 FILIP1   | 0.246 |
| 4.42E-13 | 0.587289 | 0.356 | 0.128 | 6.96E-09 | 2 FAM129A  | 0.228 |
| 5.52E-13 | 0.674186 | 0.447 | 0.208 | 8.69E-09 | 2 OAZ2     | 0.239 |
| 6.23E-13 | 0.635845 | 0.697 | 0.497 | 9.80E-09 | 2 NDUFB9   | 0.2   |
| 7.66E-13 | 0.514753 | 0.356 | 0.126 | 1.20E-08 | 2 GSTM3    | 0.23  |
| 1.13E-12 | 0.633984 | 0.75  | 0.634 | 1.78E-08 | 2 SH3BGR1  | 0.116 |
| 1.18E-12 | 0.680816 | 0.621 | 0.368 | 1.85E-08 | 2 MEF2C    | 0.253 |
| 1.63E-12 | 0.558712 | 0.371 | 0.139 | 2.56E-08 | 2 ITIH5    | 0.232 |
| 2.17E-12 | 0.957839 | 0.879 | 0.727 | 3.41E-08 | 2 SPARC    | 0.152 |
| 2.39E-12 | 0.812258 | 0.402 | 0.176 | 3.75E-08 | 2 C20orf27 | 0.226 |
| 3.76E-12 | 0.592308 | 0.553 | 0.268 | 5.91E-08 | 2 FXVD1    | 0.285 |
| 3.83E-12 | 0.992905 | 0.341 | 0.136 | 6.02E-08 | 2 NET1     | 0.205 |
| 4.01E-12 | 0.514126 | 0.841 | 0.634 | 6.31E-08 | 2 PLAC9    | 0.207 |
| 5.59E-12 | 0.596751 | 0.295 | 0.099 | 8.78E-08 | 2 OR51E1   | 0.196 |
| 5.76E-12 | 0.589432 | 0.295 | 0.098 | 9.06E-08 | 2 EBF2     | 0.197 |
| 6.99E-12 | 0.739895 | 0.576 | 0.342 | 1.10E-07 | 2 MAP1LC3A | 0.234 |
| 1.04E-11 | 0.767264 | 0.341 | 0.131 | 1.64E-07 | 2 PCSK7    | 0.21  |
| 1.18E-11 | 0.698291 | 0.303 | 0.105 | 1.86E-07 | 2 CPM      | 0.198 |
| 1.91E-11 | 1.039703 | 0.758 | 0.535 | 3.00E-07 | 2 MT1E     | 0.223 |
| 1.96E-11 | 0.698362 | 0.477 | 0.229 | 3.08E-07 | 2 PDLIM3   | 0.248 |
| 3.18E-11 | 0.704236 | 0.606 | 0.401 | 5.01E-07 | 2 ILK      | 0.205 |
| 3.51E-11 | 0.55462  | 0.455 | 0.227 | 5.52E-07 | 2 MPRIP    | 0.228 |
| 4.10E-11 | 0.713148 | 0.53  | 0.291 | 6.45E-07 | 2 FILIP1L  | 0.239 |

|          |          |       |       |          |            |       |
|----------|----------|-------|-------|----------|------------|-------|
| 5.27E-11 | 0.510288 | 0.364 | 0.149 | 8.29E-07 | 2 UBA2     | 0.215 |
| 6.22E-11 | 0.574339 | 0.379 | 0.161 | 9.79E-07 | 2 KANK2    | 0.218 |
| 1.04E-10 | 0.547817 | 0.606 | 0.39  | 1.64E-06 | 2 GHITM    | 0.216 |
| 1.28E-10 | 0.576503 | 0.356 | 0.15  | 2.01E-06 | 2 JADE1    | 0.206 |
| 1.59E-10 | 0.673784 | 0.523 | 0.327 | 2.50E-06 | 2 CCDC107  | 0.196 |
| 1.64E-10 | 0.52223  | 0.402 | 0.18  | 2.58E-06 | 2 MRPS6    | 0.222 |
| 1.80E-10 | 0.641485 | 0.606 | 0.422 | 2.84E-06 | 2 CYCS     | 0.184 |
| 2.01E-10 | 0.503127 | 0.78  | 0.686 | 3.16E-06 | 2 NDUFA1   | 0.094 |
| 3.06E-10 | 0.523262 | 0.455 | 0.234 | 4.82E-06 | 2 CFL2     | 0.221 |
| 3.13E-10 | 0.531978 | 0.689 | 0.52  | 4.92E-06 | 2 PGAM1    | 0.169 |
| 4.73E-10 | 0.558469 | 0.636 | 0.458 | 7.44E-06 | 2 PRKCDBP  | 0.178 |
| 4.85E-10 | 0.561171 | 0.273 | 0.099 | 7.63E-06 | 2 VSTM4    | 0.174 |
| 5.65E-10 | 0.616788 | 0.318 | 0.131 | 8.88E-06 | 2 PMEPA1   | 0.187 |
| 5.79E-10 | 0.826147 | 0.341 | 0.147 | 9.10E-06 | 2 PHLDA1   | 0.194 |
| 5.93E-10 | 0.657082 | 0.258 | 0.088 | 9.33E-06 | 2 CD248    | 0.17  |
| 7.44E-10 | 0.550968 | 0.485 | 0.268 | 1.17E-05 | 2 CYC1     | 0.217 |
| 1.20E-09 | 0.590752 | 0.53  | 0.31  | 1.89E-05 | 2 DLC1     | 0.22  |
| 1.39E-09 | 0.609124 | 0.455 | 0.245 | 2.19E-05 | 2 PTK2     | 0.21  |
| 1.44E-09 | 0.538862 | 0.667 | 0.461 | 2.26E-05 | 2 TUBA1A   | 0.206 |
| 1.89E-09 | 0.666427 | 0.455 | 0.247 | 2.98E-05 | 2 TGFBI    | 0.208 |
| 1.94E-09 | 0.542973 | 0.5   | 0.277 | 3.06E-05 | 2 ANXA6    | 0.223 |
| 3.41E-09 | 0.637867 | 0.379 | 0.186 | 5.36E-05 | 2 SELENBP1 | 0.193 |
| 3.79E-09 | 0.512991 | 0.318 | 0.138 | 5.96E-05 | 2 KLHDC8B  | 0.18  |
| 8.60E-09 | 0.500323 | 0.402 | 0.205 | 0.000135 | 2 RAB5B    | 0.197 |
| 9.49E-09 | 0.960214 | 0.318 | 0.147 | 0.000149 | 2 STEAP4   | 0.171 |
| 1.35E-08 | 0.528588 | 0.295 | 0.127 | 0.000212 | 2 FOXN2    | 0.168 |
| 1.41E-08 | 0.558024 | 0.636 | 0.496 | 0.000222 | 2 LDHB     | 0.14  |
| 1.50E-08 | 0.521626 | 0.326 | 0.142 | 0.000236 | 2 PALLD    | 0.184 |
| 1.98E-08 | 0.537621 | 0.28  | 0.117 | 0.000311 | 2 PDCL3    | 0.163 |
| 2.25E-08 | 0.512974 | 0.303 | 0.132 | 0.000354 | 2 RERG     | 0.171 |
| 2.59E-08 | 0.511679 | 0.409 | 0.222 | 0.000407 | 2 MDH1     | 0.187 |
| 5.31E-08 | 0.579241 | 0.447 | 0.278 | 0.000836 | 2 ACTN1    | 0.169 |
| 7.17E-08 | 0.512782 | 0.477 | 0.292 | 0.001128 | 2 FAM127B  | 0.185 |
| 8.89E-08 | 0.501196 | 0.508 | 0.332 | 0.001397 | 2 MAGED2   | 0.176 |
| 9.18E-08 | 0.539576 | 0.424 | 0.246 | 0.001443 | 2 PDLIM7   | 0.178 |
| 9.81E-08 | 0.64331  | 0.303 | 0.143 | 0.001542 | 2 GUCY1A2  | 0.16  |
| 3.49E-07 | 0.689141 | 0.348 | 0.189 | 0.005495 | 2 COLEC11  | 0.159 |
| 4.46E-07 | 0.511592 | 0.477 | 0.304 | 0.007021 | 2 MAT2A    | 0.173 |
| 4.62E-07 | 0.623994 | 0.591 | 0.384 | 0.00727  | 2 MT1M     | 0.207 |
| 6.98E-07 | 0.584608 | 0.333 | 0.176 | 0.01098  | 2 ITM2C    | 0.157 |
| 7.91E-07 | 0.838638 | 0.72  | 0.605 | 0.012443 | 2 PDK4     | 0.115 |
| 8.47E-07 | 0.525659 | 0.348 | 0.189 | 0.013324 | 2 EZR      | 0.159 |
| 2.04E-06 | 1.124672 | 0.477 | 0.401 | 0.032145 | 2 CSRP1    | 0.076 |
| 2.97E-06 | 0.511152 | 0.341 | 0.191 | 0.046737 | 2 HIF1A    | 0.15  |
| 1.45E-61 | 0.808761 | 0.811 | 0.111 | 2.29E-57 | 3 FAM162B  | 0.7   |
| 1.32E-59 | 0.815847 | 0.663 | 0.071 | 2.07E-55 | 3 KCNJ8    | 0.592 |
| 1.70E-57 | 0.962116 | 0.958 | 0.186 | 2.67E-53 | 3 GJA4     | 0.772 |
| 3.74E-57 | 1.178097 | 0.968 | 0.216 | 5.88E-53 | 3 HIGD1B   | 0.752 |
| 2.89E-56 | 0.922701 | 0.947 | 0.18  | 4.54E-52 | 3 AGT      | 0.767 |
| 1.61E-54 | 1.023286 | 0.979 | 0.213 | 2.54E-50 | 3 COX4I2   | 0.766 |
| 4.07E-50 | 0.8758   | 0.726 | 0.112 | 6.40E-46 | 3 ABCC9    | 0.614 |
| 1.81E-48 | 0.548769 | 0.6   | 0.069 | 2.85E-44 | 3 KLHL23   | 0.531 |
| 9.90E-47 | 0.766301 | 0.695 | 0.106 | 1.56E-42 | 3 FGF1     | 0.589 |
| 5.00E-44 | 0.554623 | 0.705 | 0.11  | 7.86E-40 | 3 GUCY1A2  | 0.595 |
| 6.16E-43 | 1.329477 | 1     | 0.507 | 9.69E-39 | 3 RGS5     | 0.493 |
| 1.85E-42 | 0.756787 | 0.695 | 0.117 | 2.91E-38 | 3 STEAP4   | 0.578 |
| 1.16E-41 | 0.763811 | 0.789 | 0.165 | 1.82E-37 | 3 FAM213A  | 0.624 |
| 1.66E-39 | 0.620239 | 0.779 | 0.154 | 2.61E-35 | 3 CPE      | 0.625 |

|           |          |       |       |           |             |       |
|-----------|----------|-------|-------|-----------|-------------|-------|
| 2.95E-39  | 0.730694 | 0.768 | 0.159 | 4.64E-35  | 3 PDGFRB    | 0.609 |
| 1.19E-37  | 1.040917 | 0.989 | 0.424 | 1.87E-33  | 3 NDUFA4L2  | 0.565 |
| 1.29E-37  | 0.56246  | 0.526 | 0.073 | 2.02E-33  | 3 EGFLAM    | 0.453 |
| 1.34E-37  | 0.599894 | 0.768 | 0.158 | 2.11E-33  | 3 FRMD3     | 0.61  |
| 1.11E-35  | 0.576077 | 0.768 | 0.165 | 1.75E-31  | 3 GUCY1B3   | 0.603 |
| 2.02E-34  | 0.65169  | 0.905 | 0.252 | 3.17E-30  | 3 ISYNA1    | 0.653 |
| 4.69E-34  | 0.717761 | 0.811 | 0.207 | 7.38E-30  | 3 4-Sep     | 0.604 |
| 7.39E-30  | 0.731137 | 0.863 | 0.258 | 1.16E-25  | 3 MAP1B     | 0.605 |
| 9.09E-30  | 0.504008 | 0.779 | 0.189 | 1.43E-25  | 3 MTHFD2    | 0.59  |
| 5.83E-26  | 0.647444 | 1     | 0.626 | 9.16E-22  | 3 CALD1     | 0.374 |
| 2.36E-24  | 0.613481 | 0.842 | 0.296 | 3.71E-20  | 3 EPS8      | 0.546 |
| 7.97E-21  | 0.701637 | 0.874 | 0.371 | 1.25E-16  | 3 CLEC3B    | 0.503 |
| 9.40E-21  | 0.535962 | 0.821 | 0.29  | 1.48E-16  | 3 DLC1      | 0.531 |
| 3.08E-20  | 0.521126 | 1     | 0.565 | 4.84E-16  | 3 LHFP      | 0.435 |
| 8.11E-20  | 0.593333 | 0.968 | 0.533 | 1.28E-15  | 3 FXYD6     | 0.435 |
| 8.49E-18  | 0.626693 | 1     | 0.544 | 1.34E-13  | 3 CD36      | 0.456 |
| 2.44E-17  | 0.524395 | 1     | 0.721 | 3.83E-13  | 3 SPARC     | 0.279 |
| 3.68E-17  | 0.540652 | 0.989 | 0.563 | 5.79E-13  | 3 MGLL      | 0.426 |
| 2.11E-14  | 0.53856  | 1     | 0.567 | 3.31E-10  | 3 FABP4     | 0.433 |
| 6.70E-202 | 2.882743 | 0.901 | 0.004 | 1.05E-197 | 4 CST7      | 0.897 |
| 2.89E-197 | 2.552387 | 0.852 | 0.001 | 4.55E-193 | 4 CD69      | 0.851 |
| 1.51E-191 | 3.312677 | 0.84  | 0.002 | 2.38E-187 | 4 CCL5      | 0.838 |
| 3.25E-189 | 4.124998 | 0.914 | 0.011 | 5.12E-185 | 4 NKG7      | 0.903 |
| 2.93E-188 | 2.42185  | 0.827 | 0.002 | 4.61E-184 | 4 GZMA      | 0.825 |
| 2.32E-179 | 2.31603  | 0.79  | 0.002 | 3.66E-175 | 4 CTSW      | 0.788 |
| 1.03E-166 | 2.346301 | 0.716 | 0     | 1.63E-162 | 4 KLRD1     | 0.716 |
| 5.99E-161 | 1.873389 | 0.704 | 0.001 | 9.42E-157 | 4 GZMM      | 0.703 |
| 9.79E-161 | 2.420247 | 0.691 | 0     | 1.54E-156 | 4 GZMH      | 0.691 |
| 3.58E-158 | 2.385451 | 0.704 | 0.002 | 5.63E-154 | 4 PRF1      | 0.702 |
| 1.22E-155 | 1.957182 | 0.704 | 0.003 | 1.92E-151 | 4 TRBC2     | 0.701 |
| 1.22E-155 | 2.460005 | 0.704 | 0.003 | 1.92E-151 | 4 CD7       | 0.701 |
| 4.96E-150 | 2.34034  | 0.926 | 0.036 | 7.80E-146 | 4 RAC2      | 0.89  |
| 4.25E-140 | 2.783179 | 0.617 | 0.001 | 6.69E-136 | 4 GZMB      | 0.616 |
| 2.73E-131 | 2.218729 | 0.58  | 0.001 | 4.30E-127 | 4 CD3E      | 0.579 |
| 2.36E-128 | 2.317719 | 0.568 | 0.001 | 3.71E-124 | 4 KLRB1     | 0.567 |
| 2.50E-125 | 1.753802 | 0.543 | 0     | 3.94E-121 | 4 TRBC1     | 0.543 |
| 2.50E-125 | 1.443967 | 0.543 | 0     | 3.94E-121 | 4 LINC00861 | 0.543 |
| 7.45E-124 | 2.294388 | 0.914 | 0.053 | 1.17E-119 | 4 HCST      | 0.861 |
| 2.06E-122 | 1.307682 | 0.531 | 0     | 3.24E-118 | 4 PYHIN1    | 0.531 |
| 1.49E-120 | 3.649774 | 0.889 | 0.053 | 2.35E-116 | 4 CCL4      | 0.836 |
| 1.68E-119 | 1.51768  | 0.519 | 0     | 2.64E-115 | 4 CD247     | 0.519 |
| 7.21E-117 | 1.524191 | 0.531 | 0.002 | 1.13E-112 | 4 CD2       | 0.529 |
| 2.24E-113 | 3.324102 | 0.617 | 0.013 | 3.53E-109 | 4 GNLY      | 0.604 |
| 1.25E-111 | 1.983267 | 0.877 | 0.059 | 1.96E-107 | 4 PTPRC     | 0.818 |
| 6.55E-108 | 1.699981 | 0.469 | 0     | 1.03E-103 | 4 CD3D      | 0.469 |
| 7.27E-108 | 1.588049 | 0.654 | 0.021 | 1.14E-103 | 4 GPR65     | 0.633 |
| 2.85E-99  | 1.147648 | 0.432 | 0     | 4.49E-95  | 4 PTPRCAP   | 0.432 |
| 1.47E-96  | 1.963621 | 0.778 | 0.055 | 2.31E-92  | 4 CXCR4     | 0.723 |
| 3.25E-96  | 1.632433 | 0.593 | 0.02  | 5.11E-92  | 4 IL2RG     | 0.573 |
| 2.79E-95  | 1.964148 | 0.728 | 0.044 | 4.38E-91  | 4 CORO1A    | 0.684 |
| 1.55E-93  | 1.450903 | 0.42  | 0.001 | 2.44E-89  | 4 KLRF1     | 0.419 |
| 2.82E-93  | 1.084274 | 0.42  | 0.001 | 4.43E-89  | 4 SKAP1     | 0.419 |
| 7.99E-88  | 1.053609 | 0.383 | 0     | 1.26E-83  | 4 ITK       | 0.383 |
| 2.24E-87  | 1.191235 | 0.457 | 0.007 | 3.52E-83  | 4 TBC1D10C  | 0.45  |
| 6.14E-85  | 1.095172 | 0.383 | 0.001 | 9.66E-81  | 4 RHOH      | 0.382 |
| 6.14E-85  | 1.045761 | 0.383 | 0.001 | 9.66E-81  | 4 ZAP70     | 0.382 |
| 7.75E-84  | 1.379901 | 0.605 | 0.03  | 1.22E-79  | 4 CD53      | 0.575 |
| 3.94E-82  | 1.629651 | 0.358 | 0     | 6.20E-78  | 4 XCL2      | 0.358 |

|          |          |       |       |          |             |       |
|----------|----------|-------|-------|----------|-------------|-------|
| 3.94E-82 | 1.42879  | 0.358 | 0     | 6.20E-78 | 4 CD8A      | 0.358 |
| 1.48E-81 | 1.328875 | 0.568 | 0.024 | 2.32E-77 | 4 C12orf75  | 0.544 |
| 7.89E-81 | 1.268993 | 0.494 | 0.015 | 1.24E-76 | 4 BIN2      | 0.479 |
| 2.94E-80 | 1.835864 | 0.654 | 0.046 | 4.62E-76 | 4 HOPX      | 0.608 |
| 8.42E-80 | 1.435292 | 0.395 | 0.004 | 1.32E-75 | 4 LAIR2     | 0.391 |
| 2.99E-79 | 1.069978 | 0.358 | 0.001 | 4.70E-75 | 4 LCK       | 0.357 |
| 1.10E-76 | 1.056174 | 0.37  | 0.003 | 1.73E-72 | 4 DENND2D   | 0.367 |
| 1.26E-76 | 1.612021 | 0.704 | 0.057 | 1.97E-72 | 4 LCP1      | 0.647 |
| 6.01E-75 | 1.682527 | 0.704 | 0.06  | 9.46E-71 | 4 ITGB2     | 0.644 |
| 1.25E-73 | 1.309465 | 0.321 | 0     | 1.97E-69 | 4 KLRC1     | 0.321 |
| 1.25E-73 | 1.598107 | 0.321 | 0     | 1.97E-69 | 4 XCL1      | 0.321 |
| 1.25E-73 | 0.904118 | 0.321 | 0     | 1.97E-69 | 4 SCML4     | 0.321 |
| 3.09E-73 | 1.15763  | 0.444 | 0.013 | 4.86E-69 | 4 LAT       | 0.431 |
| 5.11E-72 | 1.389819 | 0.778 | 0.077 | 8.03E-68 | 4 LAPTM5    | 0.701 |
| 8.38E-71 | 0.970056 | 0.309 | 0     | 1.32E-66 | 4 AC092580. | 0.309 |
| 1.03E-70 | 1.02489  | 0.432 | 0.013 | 1.63E-66 | 4 ACAP1     | 0.419 |
| 1.69E-70 | 1.451536 | 0.531 | 0.028 | 2.66E-66 | 4 ALOX5AP   | 0.503 |
| 2.00E-69 | 1.155551 | 0.395 | 0.009 | 3.14E-65 | 4 ARL4C     | 0.386 |
| 1.35E-68 | 1.372617 | 0.568 | 0.037 | 2.12E-64 | 4 CYTIP     | 0.531 |
| 4.19E-68 | 1.24198  | 0.432 | 0.015 | 6.58E-64 | 4 TAGAP     | 0.417 |
| 5.53E-68 | 1.246354 | 0.296 | 0     | 8.70E-64 | 4 CD8B      | 0.296 |
| 5.53E-68 | 0.889367 | 0.296 | 0     | 8.70E-64 | 4 CD96      | 0.296 |
| 6.45E-68 | 0.902577 | 0.309 | 0.001 | 1.01E-63 | 4 SAMD3     | 0.308 |
| 7.93E-68 | 0.980931 | 0.37  | 0.007 | 1.25E-63 | 4 TRAF3IP3  | 0.363 |
| 9.07E-68 | 1.422647 | 0.642 | 0.052 | 1.43E-63 | 4 CD37      | 0.59  |
| 7.78E-67 | 1.268416 | 0.444 | 0.017 | 1.22E-62 | 4 PLAC8     | 0.427 |
| 3.61E-65 | 0.927287 | 0.284 | 0     | 5.68E-61 | 4 CD3G      | 0.284 |
| 4.26E-65 | 1.02106  | 0.296 | 0.001 | 6.70E-61 | 4 IL2RB     | 0.295 |
| 6.50E-65 | 0.995782 | 0.358 | 0.007 | 1.02E-60 | 4 STAT4     | 0.351 |
| 2.91E-64 | 1.366474 | 0.519 | 0.033 | 4.58E-60 | 4 ITGA4     | 0.486 |
| 1.23E-63 | 0.849481 | 0.333 | 0.005 | 1.93E-59 | 4 RUNX3     | 0.328 |
| 9.32E-63 | 1.086356 | 0.444 | 0.02  | 1.47E-58 | 4 RHOF      | 0.424 |
| 2.79E-62 | 0.781685 | 0.284 | 0.001 | 4.38E-58 | 4 IKZF3     | 0.283 |
| 2.79E-62 | 0.813651 | 0.284 | 0.001 | 4.38E-58 | 4 SH2D1A    | 0.283 |
| 1.72E-61 | 1.382659 | 0.506 | 0.034 | 2.70E-57 | 4 PRDM1     | 0.472 |
| 1.49E-59 | 1.033105 | 0.259 | 0     | 2.34E-55 | 4 TXK       | 0.259 |
| 5.59E-59 | 1.499568 | 0.494 | 0.033 | 8.79E-55 | 4 FGF2      | 0.461 |
| 1.59E-57 | 1.358288 | 0.667 | 0.081 | 2.50E-53 | 4 GPSM3     | 0.586 |
| 5.06E-57 | 1.430214 | 0.63  | 0.075 | 7.96E-53 | 4 ISG20     | 0.555 |
| 1.18E-56 | 0.758793 | 0.259 | 0.001 | 1.85E-52 | 4 SLA2      | 0.258 |
| 4.38E-55 | 1.159527 | 0.481 | 0.035 | 6.89E-51 | 4 SELPLG    | 0.446 |
| 6.69E-55 | 0.920252 | 0.284 | 0.004 | 1.05E-50 | 4 SYTL3     | 0.28  |
| 7.35E-54 | 0.947601 | 0.346 | 0.012 | 1.16E-49 | 4 DEF6      | 0.334 |
| 6.19E-52 | 1.533629 | 0.642 | 0.09  | 9.74E-48 | 4 EVL       | 0.552 |
| 6.64E-52 | 1.439153 | 0.617 | 0.076 | 1.04E-47 | 4 UCP2      | 0.541 |
| 1.61E-51 | 1.523673 | 0.259 | 0.003 | 2.54E-47 | 4 IL7R      | 0.256 |
| 5.39E-51 | 0.885115 | 0.346 | 0.014 | 8.47E-47 | 4 ITGAL     | 0.332 |
| 1.07E-50 | 1.010996 | 0.407 | 0.024 | 1.69E-46 | 4 CD48      | 0.383 |
| 1.32E-50 | 0.944421 | 0.309 | 0.009 | 2.07E-46 | 4 SPN       | 0.3   |
| 1.93E-50 | 1.751329 | 0.667 | 0.103 | 3.04E-46 | 4 CD52      | 0.564 |
| 1.37E-49 | 0.976997 | 0.346 | 0.015 | 2.16E-45 | 4 PTGER2    | 0.331 |
| 2.56E-49 | 1.505344 | 0.617 | 0.09  | 4.03E-45 | 4 GNG2      | 0.527 |
| 2.03E-48 | 0.965488 | 0.333 | 0.014 | 3.19E-44 | 4 KLRG1     | 0.319 |
| 3.26E-48 | 1.433802 | 0.58  | 0.075 | 5.12E-44 | 4 LIMD2     | 0.505 |
| 1.46E-47 | 1.095539 | 0.469 | 0.04  | 2.30E-43 | 4 FYB       | 0.429 |
| 6.47E-47 | 1.244783 | 0.444 | 0.038 | 1.02E-42 | 4 APOBEC3C  | 0.406 |
| 4.08E-46 | 0.904019 | 0.333 | 0.016 | 6.41E-42 | 4 SASH3     | 0.317 |
| 4.21E-46 | 0.876339 | 0.333 | 0.016 | 6.62E-42 | 4 SLC38A1   | 0.317 |



|          |          |       |       |          |            |       |
|----------|----------|-------|-------|----------|------------|-------|
| 1.17E-44 | 0.98517  | 0.321 | 0.015 | 1.84E-40 | 4 IKZF1    | 0.306 |
| 3.50E-43 | 1.05514  | 1     | 0.997 | 5.51E-39 | 4 RPS27    | 0.003 |
| 1.16E-41 | 0.969473 | 0.407 | 0.035 | 1.83E-37 | 4 WAS      | 0.372 |
| 1.60E-41 | 0.855706 | 0.346 | 0.022 | 2.51E-37 | 4 PLEK     | 0.324 |
| 3.27E-41 | 0.893636 | 0.284 | 0.012 | 5.15E-37 | 4 CX3CR1   | 0.272 |
| 7.00E-41 | 0.950995 | 0.296 | 0.014 | 1.10E-36 | 4 SH2D2A   | 0.282 |
| 7.47E-40 | 1.771942 | 0.383 | 0.031 | 1.17E-35 | 4 AREG     | 0.352 |
| 6.26E-39 | 1.076122 | 0.457 | 0.053 | 9.85E-35 | 4 PARP8    | 0.404 |
| 7.92E-38 | 1.376754 | 0.988 | 0.89  | 1.25E-33 | 4 PFN1     | 0.098 |
| 1.51E-37 | 1.037313 | 0.469 | 0.06  | 2.37E-33 | 4 LCP2     | 0.409 |
| 1.29E-36 | 0.956153 | 0.37  | 0.033 | 2.02E-32 | 4 SLA      | 0.337 |
| 5.28E-36 | 1.036415 | 0.383 | 0.038 | 8.31E-32 | 4 PTGDR    | 0.345 |
| 9.83E-36 | 0.825768 | 0.346 | 0.028 | 1.55E-31 | 4 EMB      | 0.318 |
| 2.59E-35 | 0.968128 | 1     | 0.976 | 4.07E-31 | 4 RPS3     | 0.024 |
| 8.98E-35 | 1.367921 | 0.704 | 0.199 | 1.41E-30 | 4 RARRES3  | 0.505 |
| 1.07E-34 | 1.319849 | 0.605 | 0.123 | 1.68E-30 | 4 CTSC     | 0.482 |
| 6.12E-34 | 0.909056 | 0.333 | 0.029 | 9.62E-30 | 4 PIM1     | 0.304 |
| 9.43E-34 | 0.693597 | 0.259 | 0.014 | 1.48E-29 | 4 CYFIP2   | 0.245 |
| 2.95E-33 | 0.999168 | 0.407 | 0.05  | 4.65E-29 | 4 1-Sep    | 0.357 |
| 3.49E-33 | 1.226451 | 0.556 | 0.109 | 5.49E-29 | 4 ADGRE5   | 0.447 |
| 3.94E-33 | 0.873262 | 0.284 | 0.019 | 6.20E-29 | 4 MYO1F    | 0.265 |
| 1.02E-32 | 0.818172 | 1     | 0.989 | 1.60E-28 | 4 RPS15A   | 0.011 |
| 2.66E-32 | 0.773598 | 0.284 | 0.02  | 4.19E-28 | 4 ARHGAP3C | 0.264 |
| 4.10E-32 | 0.97557  | 0.383 | 0.041 | 6.44E-28 | 4 FCGR3A   | 0.342 |
| 8.20E-31 | 1.060501 | 0.951 | 0.847 | 1.29E-26 | 4 RPS29    | 0.104 |
| 3.80E-30 | 0.785093 | 0.346 | 0.038 | 5.98E-26 | 4 KCNAB2   | 0.308 |
| 9.59E-30 | 0.662684 | 1     | 0.998 | 1.51E-25 | 4 RPL41    | 0.002 |
| 2.58E-29 | 0.975522 | 0.42  | 0.065 | 4.06E-25 | 4 SLC9A3R1 | 0.355 |
| 4.28E-29 | 0.742867 | 1     | 0.992 | 6.74E-25 | 4 TMSB4X   | 0.008 |
| 4.41E-29 | 0.742042 | 0.321 | 0.032 | 6.94E-25 | 4 DOK2     | 0.289 |
| 6.59E-29 | 0.934227 | 0.469 | 0.084 | 1.04E-24 | 4 FAM49B   | 0.385 |
| 1.08E-28 | 0.815954 | 0.333 | 0.038 | 1.69E-24 | 4 AIM1     | 0.295 |
| 1.23E-27 | 1.219192 | 0.568 | 0.147 | 1.93E-23 | 4 PPP1R18  | 0.421 |
| 3.29E-27 | 0.985967 | 0.938 | 0.658 | 5.17E-23 | 4 ARHGDIB  | 0.28  |
| 4.86E-27 | 0.695223 | 1     | 0.983 | 7.65E-23 | 4 RPL28    | 0.017 |
| 7.44E-27 | 0.779981 | 0.321 | 0.037 | 1.17E-22 | 4 FAM65B   | 0.284 |
| 1.64E-26 | 0.764523 | 0.309 | 0.034 | 2.58E-22 | 4 IL10RA   | 0.275 |
| 1.69E-26 | 1.070129 | 0.42  | 0.074 | 2.66E-22 | 4 TUBA4A   | 0.346 |
| 1.76E-26 | 0.718542 | 0.321 | 0.037 | 2.77E-22 | 4 AKNA     | 0.284 |
| 3.11E-26 | 1.215002 | 0.938 | 0.838 | 4.89E-22 | 4 SH3BGRL3 | 0.1   |
| 4.86E-26 | 0.733505 | 1     | 0.971 | 7.65E-22 | 4 RPS21    | 0.029 |
| 7.63E-26 | 1.21895  | 0.778 | 0.326 | 1.20E-21 | 4 ZFP36L2  | 0.452 |
| 9.15E-26 | 1.094325 | 0.951 | 0.513 | 1.44E-21 | 4 SRGN     | 0.438 |
| 1.72E-25 | 0.658937 | 1     | 0.98  | 2.70E-21 | 4 RPS27A   | 0.02  |
| 3.75E-25 | 0.678146 | 1     | 0.968 | 5.89E-21 | 4 RPS14    | 0.032 |
| 3.95E-25 | 0.948863 | 0.457 | 0.073 | 6.21E-21 | 4 TYROBP   | 0.384 |
| 1.62E-24 | 0.867173 | 0.988 | 0.894 | 2.55E-20 | 4 RPL23A   | 0.094 |
| 2.47E-24 | 1.243454 | 0.42  | 0.071 | 3.89E-20 | 4 FCER1G   | 0.349 |
| 3.17E-24 | 0.730367 | 0.321 | 0.043 | 4.98E-20 | 4 FAM107B  | 0.278 |
| 3.66E-24 | 0.543573 | 1     | 0.997 | 5.76E-20 | 4 RPL1     | 0.003 |
| 4.01E-24 | 1.113787 | 0.802 | 0.397 | 6.30E-20 | 4 CCND3    | 0.405 |
| 6.78E-24 | 1.418618 | 0.296 | 0.034 | 1.07E-19 | 4 CCL3     | 0.262 |
| 7.79E-24 | 1.035089 | 0.42  | 0.079 | 1.23E-19 | 4 NR4A2    | 0.341 |
| 1.15E-23 | 0.804754 | 0.309 | 0.041 | 1.81E-19 | 4 BIN1     | 0.268 |
| 1.23E-23 | 0.946378 | 0.58  | 0.165 | 1.94E-19 | 4 CELF2    | 0.415 |
| 4.02E-23 | 0.862277 | 0.469 | 0.099 | 6.32E-19 | 4 VAMP8    | 0.37  |
| 4.10E-23 | 0.642411 | 1     | 0.931 | 6.45E-19 | 4 RPLP2    | 0.069 |
| 4.64E-23 | 0.582263 | 1     | 0.992 | 7.30E-19 | 4 RPL30    | 0.008 |

|          |          |       |       |          |             |       |
|----------|----------|-------|-------|----------|-------------|-------|
| 5.65E-23 | 0.777046 | 1     | 0.981 | 8.88E-19 | 4 RPS19     | 0.019 |
| 5.73E-23 | 0.693442 | 1     | 0.986 | 9.02E-19 | 4 RPS26     | 0.014 |
| 5.93E-23 | 0.870035 | 0.407 | 0.079 | 9.33E-19 | 4 TSTD1     | 0.328 |
| 9.64E-23 | 0.640002 | 1     | 0.992 | 1.52E-18 | 4 RPL39     | 0.008 |
| 1.54E-22 | 0.698504 | 1     | 0.989 | 2.42E-18 | 4 RPS12     | 0.011 |
| 3.44E-22 | 0.930284 | 1     | 0.983 | 5.41E-18 | 4 ACTB      | 0.017 |
| 3.87E-21 | 0.603741 | 1     | 0.966 | 6.09E-17 | 4 RPL3      | 0.034 |
| 4.65E-21 | 0.958929 | 0.852 | 0.336 | 7.32E-17 | 4 S100A4    | 0.516 |
| 7.58E-21 | 1.195508 | 0.556 | 0.178 | 1.19E-16 | 4 KIAA1551  | 0.378 |
| 3.37E-20 | 0.88921  | 0.358 | 0.068 | 5.30E-16 | 4 MBP       | 0.29  |
| 2.35E-19 | 0.669967 | 0.975 | 0.874 | 3.69E-15 | 4 MYL12A    | 0.101 |
| 2.59E-19 | 0.586177 | 1     | 0.976 | 4.07E-15 | 4 RPS18     | 0.024 |
| 3.54E-19 | 0.503508 | 1     | 0.986 | 5.57E-15 | 4 RPL19     | 0.014 |
| 3.86E-19 | 0.986576 | 0.494 | 0.149 | 6.08E-15 | 4 CCNH      | 0.345 |
| 9.31E-19 | 0.542096 | 1     | 0.966 | 1.46E-14 | 4 RPS4X     | 0.034 |
| 1.03E-18 | 0.784714 | 0.333 | 0.064 | 1.61E-14 | 4 FKBP11    | 0.269 |
| 1.40E-18 | 0.760128 | 0.926 | 0.814 | 2.20E-14 | 4 RPSA      | 0.112 |
| 1.78E-18 | 0.640889 | 1     | 0.953 | 2.80E-14 | 4 RPL14     | 0.047 |
| 1.86E-18 | 1.187294 | 0.519 | 0.157 | 2.93E-14 | 4 SPON2     | 0.362 |
| 3.61E-18 | 0.55853  | 1     | 0.994 | 5.68E-14 | 4 B2M       | 0.006 |
| 3.68E-18 | 0.576782 | 1     | 0.976 | 5.79E-14 | 4 RPL18A    | 0.024 |
| 5.71E-18 | 0.913067 | 0.84  | 0.658 | 8.99E-14 | 4 YWHAZ     | 0.182 |
| 1.59E-17 | 0.730856 | 0.272 | 0.044 | 2.50E-13 | 4 FERMT3    | 0.228 |
| 1.98E-17 | 0.872089 | 0.42  | 0.11  | 3.11E-13 | 4 STK17B    | 0.31  |
| 2.33E-17 | 0.974587 | 0.407 | 0.107 | 3.66E-13 | 4 CNN2      | 0.3   |
| 5.01E-17 | 0.525498 | 1     | 0.992 | 7.89E-13 | 4 RPL13     | 0.008 |
| 9.03E-17 | 0.759317 | 0.309 | 0.062 | 1.42E-12 | 4 TMEM2     | 0.247 |
| 1.49E-16 | 0.789406 | 0.802 | 0.533 | 2.34E-12 | 4 RAP1B     | 0.269 |
| 1.96E-16 | 0.564329 | 0.988 | 0.931 | 3.08E-12 | 4 RPL26     | 0.057 |
| 2.61E-16 | 0.505566 | 1     | 0.962 | 4.11E-12 | 4 RPL6      | 0.038 |
| 2.81E-16 | 0.840763 | 0.889 | 0.663 | 4.42E-12 | 4 ARPC2     | 0.226 |
| 3.73E-16 | 0.955951 | 0.395 | 0.11  | 5.87E-12 | 4 ARPC5L    | 0.285 |
| 4.97E-16 | 0.749424 | 0.951 | 0.861 | 7.82E-12 | 4 CFL1      | 0.09  |
| 7.85E-16 | 0.949824 | 0.407 | 0.117 | 1.23E-11 | 4 PPP2R5C   | 0.29  |
| 2.12E-15 | 0.769552 | 0.432 | 0.127 | 3.34E-11 | 4 HCLS1     | 0.305 |
| 3.25E-15 | 0.54721  | 1     | 0.928 | 5.10E-11 | 4 RPS6      | 0.072 |
| 4.53E-15 | 0.754718 | 0.309 | 0.068 | 7.13E-11 | 4 ANKRD44   | 0.241 |
| 5.34E-15 | 0.775761 | 0.383 | 0.104 | 8.40E-11 | 4 ICAM3     | 0.279 |
| 5.38E-15 | 0.973443 | 0.556 | 0.238 | 8.46E-11 | 4 RNF213    | 0.318 |
| 1.75E-14 | 0.880872 | 0.309 | 0.071 | 2.76E-10 | 4 PRKACB    | 0.238 |
| 1.85E-14 | 0.84665  | 0.494 | 0.184 | 2.91E-10 | 4 WIPF1     | 0.31  |
| 1.87E-14 | 0.734511 | 0.321 | 0.076 | 2.94E-10 | 4 RGS19     | 0.245 |
| 3.22E-14 | 0.682932 | 0.691 | 0.312 | 5.06E-10 | 4 LSP1      | 0.379 |
| 3.33E-14 | 0.522096 | 1     | 0.962 | 5.24E-10 | 4 RPL37     | 0.038 |
| 3.68E-14 | 0.570354 | 0.963 | 0.885 | 5.79E-10 | 4 TMA7      | 0.078 |
| 3.82E-14 | 0.833175 | 0.58  | 0.256 | 6.00E-10 | 4 GMFG      | 0.324 |
| 1.78E-13 | 1.549308 | 0.481 | 0.209 | 2.80E-09 | 4 CMC1      | 0.272 |
| 2.69E-13 | 0.589175 | 0.988 | 0.824 | 4.23E-09 | 4 TSC22D3   | 0.164 |
| 2.92E-13 | 0.848979 | 0.63  | 0.321 | 4.60E-09 | 4 BTG1      | 0.309 |
| 3.20E-13 | 0.810855 | 0.679 | 0.396 | 5.04E-09 | 4 C9orf142  | 0.283 |
| 4.18E-13 | 0.846531 | 0.284 | 0.067 | 6.57E-09 | 4 ZNF331    | 0.217 |
| 4.91E-13 | 0.935114 | 0.333 | 0.092 | 7.72E-09 | 4 STK4      | 0.241 |
| 5.31E-13 | 0.711576 | 0.494 | 0.193 | 8.35E-09 | 4 PRKCH     | 0.301 |
| 5.62E-13 | 0.637458 | 0.988 | 0.915 | 8.84E-09 | 4 AC090498. | 0.073 |
| 7.95E-13 | 0.630123 | 0.284 | 0.066 | 1.25E-08 | 4 TNFAIP8   | 0.218 |
| 1.16E-12 | 0.596666 | 0.37  | 0.107 | 1.82E-08 | 4 RGS10     | 0.263 |
| 1.47E-12 | 0.958026 | 0.42  | 0.144 | 2.32E-08 | 4 CLIC3     | 0.276 |
| 1.96E-12 | 0.769556 | 0.358 | 0.109 | 3.09E-08 | 4 UPP1      | 0.249 |

|           |          |       |       |           |             |       |
|-----------|----------|-------|-------|-----------|-------------|-------|
| 2.71E-12  | 0.643276 | 0.259 | 0.058 | 4.26E-08  | 4 PTPN4     | 0.201 |
| 2.83E-12  | 0.865992 | 0.568 | 0.288 | 4.44E-08  | 4 ABRACL    | 0.28  |
| 3.64E-12  | 0.804103 | 0.605 | 0.326 | 5.72E-08  | 4 LITAF     | 0.279 |
| 3.80E-12  | 0.733701 | 0.938 | 0.887 | 5.97E-08  | 4 ACTG1     | 0.051 |
| 3.87E-12  | 0.895949 | 0.42  | 0.161 | 6.08E-08  | 4 FYN       | 0.259 |
| 1.14E-11  | 0.795727 | 0.519 | 0.235 | 1.80E-07  | 4 ID2       | 0.284 |
| 1.48E-11  | 0.656088 | 0.889 | 0.737 | 2.32E-07  | 4 EEF1B2    | 0.152 |
| 1.98E-11  | 0.570356 | 0.309 | 0.087 | 3.12E-07  | 4 STK10     | 0.222 |
| 2.30E-11  | 0.669378 | 0.333 | 0.098 | 3.62E-07  | 4 ARRB2     | 0.235 |
| 2.69E-11  | 0.643854 | 0.259 | 0.063 | 4.23E-07  | 4 CKS2      | 0.196 |
| 2.73E-11  | 0.615223 | 0.852 | 0.705 | 4.29E-07  | 4 RPL36A    | 0.147 |
| 2.76E-11  | 0.799096 | 0.296 | 0.085 | 4.35E-07  | 4 LYAR      | 0.211 |
| 5.74E-11  | 0.59137  | 0.272 | 0.072 | 9.02E-07  | 4 PTGER4    | 0.2   |
| 5.85E-11  | 0.550324 | 0.827 | 0.661 | 9.20E-07  | 4 SUB1      | 0.166 |
| 9.15E-11  | 0.799526 | 0.679 | 0.478 | 1.44E-06  | 4 EMP3      | 0.201 |
| 1.15E-10  | 0.674589 | 0.704 | 0.475 | 1.81E-06  | 4 HMGN1     | 0.229 |
| 1.62E-10  | 0.73677  | 0.543 | 0.293 | 2.55E-06  | 4 GTF3A     | 0.25  |
| 2.22E-10  | 0.55535  | 0.951 | 0.877 | 3.50E-06  | 4 RPL10A    | 0.074 |
| 2.90E-10  | 0.629303 | 0.309 | 0.094 | 4.55E-06  | 4 CSK       | 0.215 |
| 3.35E-10  | 0.554474 | 0.864 | 0.667 | 5.26E-06  | 4 PABPC1    | 0.197 |
| 3.74E-10  | 0.579774 | 0.802 | 0.634 | 5.89E-06  | 4 ARPC3     | 0.168 |
| 2.43E-09  | 0.581082 | 0.704 | 0.488 | 3.82E-05  | 4 PSMB9     | 0.216 |
| 2.50E-09  | 0.755085 | 0.358 | 0.14  | 3.93E-05  | 4 MAPK1     | 0.218 |
| 2.65E-09  | 0.675695 | 0.383 | 0.155 | 4.17E-05  | 4 ARHGEF1   | 0.228 |
| 3.05E-09  | 0.540547 | 0.914 | 0.765 | 4.80E-05  | 4 CLIC1     | 0.149 |
| 3.73E-09  | 0.579226 | 0.321 | 0.114 | 5.87E-05  | 4 CDC42SE2  | 0.207 |
| 4.96E-09  | 0.657559 | 0.432 | 0.187 | 7.79E-05  | 4 CD44      | 0.245 |
| 6.48E-09  | 0.792135 | 0.494 | 0.275 | 0.000102  | 4 CLEC2B    | 0.219 |
| 1.28E-08  | 0.615383 | 0.358 | 0.149 | 0.000201  | 4 SH3KBP1   | 0.209 |
| 1.30E-08  | 0.602756 | 0.642 | 0.436 | 0.000204  | 4 MBNL1     | 0.206 |
| 1.43E-08  | 0.53395  | 0.284 | 0.093 | 0.000225  | 4 RASA2     | 0.191 |
| 1.74E-08  | 0.615775 | 0.704 | 0.503 | 0.000274  | 4 TPM3      | 0.201 |
| 2.03E-08  | 0.638055 | 0.444 | 0.222 | 0.000319  | 4 TPST2     | 0.222 |
| 3.47E-08  | 0.778938 | 0.284 | 0.102 | 0.000546  | 4 CTD-32520 | 0.182 |
| 4.51E-08  | 0.658582 | 0.58  | 0.393 | 0.00071   | 4 ACTR3     | 0.187 |
| 4.94E-08  | 0.536658 | 0.272 | 0.092 | 0.000777  | 4 RAB29     | 0.18  |
| 5.93E-08  | 0.596948 | 0.333 | 0.131 | 0.000933  | 4 GLIPR2    | 0.202 |
| 6.80E-08  | 0.653996 | 0.642 | 0.479 | 0.001069  | 4 APRT      | 0.163 |
| 8.26E-08  | 0.555377 | 0.383 | 0.167 | 0.001299  | 4 PYCARD    | 0.216 |
| 1.80E-07  | 0.714115 | 0.284 | 0.109 | 0.002824  | 4 FLT3LG    | 0.175 |
| 2.31E-07  | 0.640033 | 0.333 | 0.145 | 0.003637  | 4 CDC42SE1  | 0.188 |
| 3.23E-07  | 0.580144 | 0.309 | 0.122 | 0.005083  | 4 GLIPR1    | 0.187 |
| 3.50E-07  | 0.577678 | 0.395 | 0.19  | 0.00551   | 4 TAP1      | 0.205 |
| 4.66E-07  | 0.593107 | 0.309 | 0.127 | 0.007327  | 4 ATM       | 0.182 |
| 5.12E-07  | 0.632146 | 0.309 | 0.13  | 0.008055  | 4 IDI1      | 0.179 |
| 5.91E-07  | 0.539828 | 0.358 | 0.164 | 0.009297  | 4 CKLF      | 0.194 |
| 6.29E-07  | 0.65906  | 0.531 | 0.336 | 0.009889  | 4 ETS1      | 0.195 |
| 1.08E-06  | 0.558847 | 0.383 | 0.189 | 0.017055  | 4 CASP4     | 0.194 |
| 1.36E-06  | 0.682415 | 0.556 | 0.414 | 0.021392  | 4 PRR13     | 0.142 |
| 1.45E-06  | 0.589572 | 0.568 | 0.422 | 0.022843  | 4 SRSF2     | 0.146 |
| 2.11E-06  | 0.558827 | 0.457 | 0.254 | 0.033144  | 4 LBH       | 0.203 |
| 2.18E-06  | 0.609151 | 0.457 | 0.273 | 0.034221  | 4 CARD16    | 0.184 |
| 2.70E-06  | 0.591307 | 0.284 | 0.122 | 0.042467  | 4 MAP3K8    | 0.162 |
| 2.89E-06  | 0.568758 | 0.617 | 0.469 | 0.045426  | 4 RSRP1     | 0.148 |
| 3.03E-218 | 2.872914 | 0.986 | 0.005 | 4.76E-214 | 5 AIF1      | 0.981 |
| 1.37E-199 | 3.035807 | 0.887 | 0.003 | 2.16E-195 | 5 LYZ       | 0.884 |
| 1.33E-191 | 2.210837 | 0.831 | 0.001 | 2.10E-187 | 5 MS4A7     | 0.83  |
| 1.86E-181 | 2.427261 | 0.775 | 0     | 2.93E-177 | 5 MS4A6A    | 0.775 |

|           |          |       |       |           |            |       |
|-----------|----------|-------|-------|-----------|------------|-------|
| 1.86E-181 | 1.604892 | 0.775 | 0     | 2.93E-177 | 5 CYBB     | 0.775 |
| 3.66E-168 | 1.960001 | 0.746 | 0.002 | 5.76E-164 | 5 CD163    | 0.744 |
| 4.02E-164 | 2.274211 | 0.732 | 0.002 | 6.32E-160 | 5 LST1     | 0.73  |
| 1.20E-161 | 3.159996 | 0.732 | 0.003 | 1.89E-157 | 5 C1QA     | 0.729 |
| 3.41E-158 | 1.924467 | 0.718 | 0.003 | 5.36E-154 | 5 CSF1R    | 0.715 |
| 7.36E-152 | 3.122924 | 0.986 | 0.039 | 1.16E-147 | 5 TYROBP   | 0.947 |
| 1.78E-147 | 1.417245 | 0.648 | 0.001 | 2.80E-143 | 5 C3AR1    | 0.647 |
| 1.52E-146 | 2.359132 | 0.972 | 0.036 | 2.39E-142 | 5 FCER1G   | 0.936 |
| 1.35E-138 | 3.224606 | 0.648 | 0.004 | 2.12E-134 | 5 C1QB     | 0.644 |
| 5.52E-134 | 1.734107 | 0.592 | 0.001 | 8.68E-130 | 5 GPR34    | 0.591 |
| 2.36E-131 | 3.208762 | 0.606 | 0.003 | 3.70E-127 | 5 C1QC     | 0.603 |
| 7.62E-131 | 1.399703 | 0.592 | 0.002 | 1.20E-126 | 5 C5AR1    | 0.59  |
| 1.06E-130 | 1.583634 | 0.563 | 0     | 1.67E-126 | 5 MS4A4A   | 0.563 |
| 4.89E-124 | 1.267411 | 0.535 | 0     | 7.70E-120 | 5 MSR1     | 0.535 |
| 1.03E-120 | 1.580047 | 0.521 | 0     | 1.62E-116 | 5 VSIG4    | 0.521 |
| 1.03E-120 | 1.117641 | 0.521 | 0     | 1.62E-116 | 5 1-Mar    | 0.521 |
| 2.27E-120 | 0.955325 | 0.535 | 0.001 | 3.58E-116 | 5 HCK      | 0.534 |
| 4.82E-117 | 1.671246 | 0.521 | 0.001 | 7.58E-113 | 5 SERPINA1 | 0.52  |
| 4.37E-114 | 1.785026 | 0.493 | 0     | 6.88E-110 | 5 FOLR2    | 0.493 |
| 8.83E-111 | 1.103541 | 0.479 | 0     | 1.39E-106 | 5 MPEG1    | 0.479 |
| 1.36E-110 | 1.120232 | 0.493 | 0.001 | 2.14E-106 | 5 CLEC7A   | 0.492 |
| 4.58E-110 | 2.545917 | 0.549 | 0.006 | 7.20E-106 | 5 CXCL8    | 0.543 |
| 7.34E-110 | 2.303853 | 0.887 | 0.06  | 1.15E-105 | 5 CD68     | 0.827 |
| 2.77E-107 | 1.421965 | 0.479 | 0.001 | 4.35E-103 | 5 LILRB2   | 0.478 |
| 3.07E-104 | 2.853559 | 0.465 | 0.001 | 4.82E-100 | 5 IL1B     | 0.464 |
| 1.33E-103 | 1.695356 | 0.676 | 0.024 | 2.09E-99  | 5 C1orf162 | 0.652 |
| 1.28E-97  | 1.535433 | 0.423 | 0     | 2.02E-93  | 5 MRC1     | 0.423 |
| 6.28E-96  | 1.217332 | 0.577 | 0.015 | 9.88E-92  | 5 COTL1    | 0.562 |
| 2.58E-92  | 1.306935 | 0.535 | 0.012 | 4.06E-88  | 5 IFI30    | 0.523 |
| 6.84E-92  | 1.815495 | 0.69  | 0.036 | 1.08E-87  | 5 CD83     | 0.654 |
| 4.51E-91  | 0.827817 | 0.394 | 0     | 7.10E-87  | 5 LRRC25   | 0.394 |
| 4.59E-91  | 0.89496  | 0.437 | 0.003 | 7.22E-87  | 5 NCF4     | 0.434 |
| 5.16E-91  | 0.936912 | 0.423 | 0.002 | 8.12E-87  | 5 RBM47    | 0.421 |
| 4.33E-89  | 1.447626 | 0.62  | 0.026 | 6.81E-85  | 5 MAFB     | 0.594 |
| 5.20E-88  | 1.47805  | 0.408 | 0.002 | 8.18E-84  | 5 LYVE1    | 0.406 |
| 1.14E-87  | 2.502407 | 0.394 | 0.001 | 1.79E-83  | 5 S100A9   | 0.393 |
| 4.15E-85  | 1.21795  | 0.423 | 0.004 | 6.52E-81  | 5 GPR183   | 0.419 |
| 8.12E-85  | 1.176092 | 0.408 | 0.003 | 1.28E-80  | 5 FCGR2B   | 0.405 |
| 1.51E-84  | 1.115303 | 0.366 | 0     | 2.37E-80  | 5 CLEC10A  | 0.366 |
| 2.04E-84  | 0.832496 | 0.38  | 0.001 | 3.21E-80  | 5 SPI1     | 0.379 |
| 2.19E-84  | 2.033483 | 0.803 | 0.07  | 3.45E-80  | 5 CTSS     | 0.733 |
| 2.48E-84  | 0.921916 | 0.38  | 0.001 | 3.90E-80  | 5 FPR3     | 0.379 |
| 2.70E-84  | 1.006217 | 0.451 | 0.007 | 4.25E-80  | 5 PILRA    | 0.444 |
| 2.95E-84  | 2.238965 | 0.479 | 0.01  | 4.64E-80  | 5 BCL2A1   | 0.469 |
| 3.10E-84  | 0.777319 | 0.38  | 0.001 | 4.87E-80  | 5 LILRB4   | 0.379 |
| 6.87E-84  | 1.641169 | 0.845 | 0.076 | 1.08E-79  | 5 VAMP8    | 0.769 |
| 1.89E-82  | 1.111603 | 0.479 | 0.011 | 2.98E-78  | 5 FCGR2A   | 0.468 |
| 1.90E-82  | 0.86373  | 0.423 | 0.005 | 2.99E-78  | 5 BCAT1    | 0.418 |
| 4.79E-82  | 1.833168 | 0.845 | 0.079 | 7.53E-78  | 5 LAPTM5   | 0.766 |
| 6.01E-82  | 1.535181 | 0.69  | 0.044 | 9.45E-78  | 5 CXCL16   | 0.646 |
| 9.03E-82  | 1.611915 | 0.831 | 0.077 | 1.42E-77  | 5 RGS10    | 0.754 |
| 2.05E-81  | 0.853147 | 0.394 | 0.003 | 3.23E-77  | 5 RGS18    | 0.391 |
| 2.30E-81  | 1.147843 | 0.38  | 0.002 | 3.61E-77  | 5 NLRP3    | 0.378 |
| 2.70E-81  | 0.881219 | 0.352 | 0     | 4.24E-77  | 5 MNDA     | 0.352 |
| 2.70E-81  | 0.698485 | 0.352 | 0     | 4.24E-77  | 5 LILRA6   | 0.352 |
| 3.55E-81  | 1.377597 | 0.803 | 0.059 | 5.58E-77  | 5 ITGB2    | 0.744 |
| 5.04E-81  | 0.845    | 0.366 | 0.001 | 7.93E-77  | 5 NCF2     | 0.365 |
| 2.49E-80  | 1.366691 | 0.732 | 0.053 | 3.92E-76  | 5 SMAP2    | 0.679 |

|          |          |       |       |          |             |       |
|----------|----------|-------|-------|----------|-------------|-------|
| 4.77E-78 | 0.765003 | 0.338 | 0     | 7.50E-74 | 5 FGD2      | 0.338 |
| 4.77E-78 | 0.75492  | 0.338 | 0     | 7.50E-74 | 5 CLEC4E    | 0.338 |
| 8.25E-78 | 1.410793 | 0.775 | 0.058 | 1.30E-73 | 5 LCP1      | 0.717 |
| 2.38E-77 | 1.404992 | 0.507 | 0.017 | 3.74E-73 | 5 CD14      | 0.49  |
| 2.46E-77 | 1.320058 | 0.479 | 0.013 | 3.88E-73 | 5 NCF1      | 0.466 |
| 2.75E-76 | 1.395566 | 0.437 | 0.009 | 4.33E-72 | 5 HMOX1     | 0.428 |
| 3.29E-75 | 1.434207 | 0.366 | 0.003 | 5.18E-71 | 5 F13A1     | 0.363 |
| 8.32E-75 | 0.722401 | 0.324 | 0     | 1.31E-70 | 5 CD86      | 0.324 |
| 1.00E-74 | 0.802658 | 0.338 | 0.001 | 1.57E-70 | 5 C19orf38  | 0.337 |
| 2.87E-74 | 0.937737 | 0.521 | 0.021 | 4.51E-70 | 5 TBXAS1    | 0.5   |
| 1.72E-72 | 1.311738 | 0.761 | 0.07  | 2.71E-68 | 5 ARRB2     | 0.691 |
| 2.39E-72 | 0.878114 | 0.366 | 0.004 | 3.76E-68 | 5 SLC1A3    | 0.362 |
| 9.43E-72 | 1.448458 | 0.704 | 0.053 | 1.48E-67 | 5 CD37      | 0.651 |
| 1.20E-71 | 0.927628 | 0.338 | 0.002 | 1.88E-67 | 5 CFP       | 0.336 |
| 1.25E-70 | 0.685    | 0.394 | 0.007 | 1.96E-66 | 5 CD4       | 0.387 |
| 2.04E-68 | 1.284823 | 0.324 | 0.002 | 3.21E-64 | 5 LINC01272 | 0.322 |
| 2.44E-68 | 0.654694 | 0.296 | 0     | 3.84E-64 | 5 IGSF6     | 0.296 |
| 2.44E-68 | 0.614598 | 0.296 | 0     | 3.84E-64 | 5 LILRB3    | 0.296 |
| 2.85E-68 | 1.504757 | 0.31  | 0.001 | 4.48E-64 | 5 FCN1      | 0.309 |
| 2.86E-68 | 1.193619 | 0.803 | 0.072 | 4.51E-64 | 5 PTPRC     | 0.731 |
| 4.18E-68 | 0.966652 | 0.31  | 0.001 | 6.58E-64 | 5 FCGR1A    | 0.309 |
| 2.62E-65 | 0.857114 | 0.324 | 0.003 | 4.11E-61 | 5 RNASE6    | 0.321 |
| 4.10E-65 | 0.622876 | 0.282 | 0     | 6.44E-61 | 5 CSF2RA    | 0.282 |
| 4.84E-65 | 0.774737 | 0.296 | 0.001 | 7.61E-61 | 5 FPR1      | 0.295 |
| 6.55E-65 | 0.947072 | 0.408 | 0.012 | 1.03E-60 | 5 CSTA      | 0.396 |
| 6.72E-65 | 0.598985 | 0.296 | 0.001 | 1.06E-60 | 5 CSF3R     | 0.295 |
| 1.18E-64 | 1.043266 | 0.563 | 0.037 | 1.85E-60 | 5 SLC31A2   | 0.526 |
| 2.42E-63 | 0.870386 | 0.366 | 0.008 | 3.81E-59 | 5 SLC7A7    | 0.358 |
| 2.88E-63 | 0.894538 | 0.338 | 0.005 | 4.53E-59 | 5 CD84      | 0.333 |
| 5.26E-63 | 0.819674 | 0.394 | 0.011 | 8.27E-59 | 5 POU2F2    | 0.383 |
| 2.82E-62 | 1.073283 | 0.38  | 0.01  | 4.44E-58 | 5 STXBP2    | 0.37  |
| 5.85E-62 | 0.753678 | 0.352 | 0.007 | 9.19E-58 | 5 NPL       | 0.345 |
| 1.18E-61 | 0.928983 | 0.366 | 0.009 | 1.86E-57 | 5 SLC11A1   | 0.357 |
| 1.22E-61 | 2.102952 | 0.662 | 0.066 | 1.92E-57 | 5 TNFAIP3   | 0.596 |
| 3.25E-61 | 1.563772 | 0.535 | 0.034 | 5.10E-57 | 5 FCGR3A    | 0.501 |
| 4.36E-61 | 0.797628 | 0.394 | 0.012 | 6.86E-57 | 5 THEMIS2   | 0.382 |
| 1.43E-60 | 1.08968  | 0.563 | 0.038 | 2.25E-56 | 5 FYB       | 0.525 |
| 5.75E-60 | 0.7809   | 0.352 | 0.008 | 9.05E-56 | 5 FAM26F    | 0.344 |
| 1.49E-59 | 0.6665   | 0.31  | 0.004 | 2.35E-55 | 5 ALOX5     | 0.306 |
| 4.06E-59 | 0.620053 | 0.296 | 0.003 | 6.38E-55 | 5 CLEC4A    | 0.293 |
| 5.90E-59 | 0.554294 | 0.296 | 0.003 | 9.28E-55 | 5 BTK       | 0.293 |
| 7.98E-59 | 0.732039 | 0.338 | 0.007 | 1.26E-54 | 5 SYK       | 0.331 |
| 1.11E-58 | 0.843938 | 0.254 | 0     | 1.75E-54 | 5 LILRB5    | 0.254 |
| 1.11E-58 | 0.746611 | 0.254 | 0     | 1.75E-54 | 5 LILRA5    | 0.254 |
| 1.11E-58 | 0.685829 | 0.254 | 0     | 1.75E-54 | 5 AQP9      | 0.254 |
| 1.11E-58 | 0.602167 | 0.254 | 0     | 1.75E-54 | 5 LY86      | 0.254 |
| 1.11E-58 | 0.575388 | 0.254 | 0     | 1.75E-54 | 5 GAPT      | 0.254 |
| 1.81E-58 | 0.682747 | 0.268 | 0.001 | 2.84E-54 | 5 EMILIN2   | 0.267 |
| 2.63E-58 | 0.84263  | 0.479 | 0.025 | 4.14E-54 | 5 IL10RA    | 0.454 |
| 5.43E-58 | 0.693616 | 0.38  | 0.012 | 8.55E-54 | 5 PARVG     | 0.368 |
| 2.87E-57 | 1.56556  | 0.437 | 0.021 | 4.51E-53 | 5 SAMSN1    | 0.416 |
| 3.35E-56 | 1.355087 | 0.408 | 0.017 | 5.27E-52 | 5 RGS1      | 0.391 |
| 7.28E-56 | 1.046334 | 0.451 | 0.024 | 1.14E-51 | 5 FGR       | 0.427 |
| 1.05E-55 | 1.25517  | 0.718 | 0.075 | 1.66E-51 | 5 HCST      | 0.643 |
| 2.94E-55 | 0.564182 | 0.254 | 0.001 | 4.62E-51 | 5 SLAMF8    | 0.253 |
| 1.28E-53 | 2.18853  | 0.451 | 0.026 | 2.01E-49 | 5 CCL3      | 0.425 |
| 1.70E-53 | 0.885565 | 0.423 | 0.021 | 2.67E-49 | 5 LAIR1     | 0.402 |
| 4.10E-53 | 0.921481 | 0.704 | 0.074 | 6.44E-49 | 5 CCL4      | 0.63  |

|          |          |       |       |          |             |       |
|----------|----------|-------|-------|----------|-------------|-------|
| 9.05E-53 | 0.625179 | 0.31  | 0.007 | 1.42E-48 | 5 CPVL      | 0.303 |
| 1.03E-52 | 0.889122 | 0.451 | 0.026 | 1.61E-48 | 5 DOK2      | 0.425 |
| 6.47E-52 | 1.190452 | 0.676 | 0.077 | 1.02E-47 | 5 UCP2      | 0.599 |
| 8.44E-52 | 0.889649 | 0.38  | 0.016 | 1.33E-47 | 5 IL18      | 0.364 |
| 3.69E-51 | 0.568071 | 0.282 | 0.005 | 5.80E-47 | 5 TLR2      | 0.277 |
| 2.00E-50 | 0.60593  | 0.268 | 0.004 | 3.15E-46 | 5 TMEM37    | 0.264 |
| 1.13E-49 | 1.358569 | 0.789 | 0.141 | 1.78E-45 | 5 PYCARD    | 0.648 |
| 1.49E-49 | 0.601164 | 0.296 | 0.007 | 2.34E-45 | 5 CH17-373  | 0.289 |
| 1.94E-49 | 0.771824 | 0.662 | 0.07  | 3.06E-45 | 5 CXCR4     | 0.592 |
| 1.07E-48 | 0.770021 | 0.479 | 0.034 | 1.68E-44 | 5 WAS       | 0.445 |
| 5.35E-48 | 0.752825 | 0.338 | 0.013 | 8.41E-44 | 5 ITGAM     | 0.325 |
| 1.47E-47 | 0.856103 | 0.296 | 0.008 | 2.32E-43 | 5 LILRB1    | 0.288 |
| 2.50E-47 | 0.848421 | 0.451 | 0.031 | 3.93E-43 | 5 SLA       | 0.42  |
| 3.01E-47 | 0.700621 | 0.254 | 0.004 | 4.74E-43 | 5 VMO1      | 0.25  |
| 2.41E-46 | 0.912212 | 0.521 | 0.045 | 3.79E-42 | 5 CYTIP     | 0.476 |
| 9.03E-46 | 0.933703 | 0.592 | 0.06  | 1.42E-41 | 5 CORO1A    | 0.532 |
| 1.39E-45 | 0.560775 | 0.268 | 0.006 | 2.18E-41 | 5 ACP5      | 0.262 |
| 3.97E-45 | 0.7222   | 0.324 | 0.013 | 6.25E-41 | 5 EVI2B     | 0.311 |
| 1.31E-44 | 2.138051 | 0.451 | 0.038 | 2.05E-40 | 5 CXCL3     | 0.413 |
| 7.48E-44 | 1.931012 | 0.718 | 0.134 | 1.18E-39 | 5 HLA-DQA1  | 0.584 |
| 1.91E-43 | 0.872788 | 0.296 | 0.011 | 3.01E-39 | 5 PTGS2     | 0.285 |
| 1.73E-42 | 0.737889 | 0.31  | 0.013 | 2.72E-38 | 5 CYTH4     | 0.297 |
| 1.25E-41 | 0.59093  | 0.268 | 0.008 | 1.97E-37 | 5 FAM105A   | 0.26  |
| 1.61E-41 | 1.20632  | 0.549 | 0.068 | 2.53E-37 | 5 RP11-160E | 0.481 |
| 2.15E-41 | 2.044847 | 1     | 0.979 | 3.38E-37 | 5 FTL       | 0.021 |
| 3.16E-41 | 2.156649 | 0.972 | 0.472 | 4.97E-37 | 5 SAT1      | 0.5   |
| 5.58E-41 | 0.692859 | 0.465 | 0.04  | 8.78E-37 | 5 SELPLG    | 0.425 |
| 6.25E-41 | 2.227517 | 0.972 | 0.475 | 9.83E-37 | 5 HLA-DRA   | 0.497 |
| 1.28E-40 | 1.113241 | 0.69  | 0.124 | 2.01E-36 | 5 RNASET2   | 0.566 |
| 2.07E-40 | 0.605165 | 0.366 | 0.024 | 3.25E-36 | 5 METRNL    | 0.342 |
| 1.25E-38 | 1.422284 | 0.479 | 0.055 | 1.96E-34 | 5 PLAUR     | 0.424 |
| 1.41E-38 | 0.893225 | 0.479 | 0.052 | 2.21E-34 | 5 CECR1     | 0.427 |
| 1.78E-38 | 0.523733 | 0.268 | 0.01  | 2.80E-34 | 5 SNX10     | 0.258 |
| 3.17E-38 | 0.597773 | 0.31  | 0.016 | 4.99E-34 | 5 IRF8      | 0.294 |
| 2.04E-37 | 0.525964 | 0.254 | 0.009 | 3.22E-33 | 5 VNN2      | 0.245 |
| 3.21E-37 | 0.574657 | 0.282 | 0.013 | 5.05E-33 | 5 CHKA      | 0.269 |
| 5.27E-37 | 1.891641 | 0.986 | 0.687 | 8.29E-33 | 5 GPX1      | 0.299 |
| 6.58E-37 | 0.700751 | 0.366 | 0.028 | 1.03E-32 | 5 TNFSF13B  | 0.338 |
| 6.96E-37 | 1.087334 | 0.62  | 0.102 | 1.09E-32 | 5 GLIPR1    | 0.518 |
| 5.60E-36 | 0.847321 | 0.423 | 0.043 | 8.80E-32 | 5 LYN       | 0.38  |
| 4.40E-35 | 0.821387 | 0.366 | 0.03  | 6.92E-31 | 5 EMB       | 0.336 |
| 1.09E-34 | 0.628392 | 0.394 | 0.037 | 1.71E-30 | 5 ZNF385A   | 0.357 |
| 1.11E-34 | 0.536272 | 0.31  | 0.019 | 1.74E-30 | 5 CD300A    | 0.291 |
| 1.48E-34 | 0.511583 | 0.296 | 0.017 | 2.32E-30 | 5 PIK3R5    | 0.279 |
| 3.05E-34 | 1.076021 | 0.465 | 0.055 | 4.79E-30 | 5 TNF       | 0.41  |
| 4.25E-34 | 0.646231 | 0.408 | 0.04  | 6.69E-30 | 5 CMTM7     | 0.368 |
| 4.70E-34 | 0.508648 | 0.268 | 0.013 | 7.38E-30 | 5 HMHA1     | 0.255 |
| 5.43E-34 | 0.582694 | 0.282 | 0.016 | 8.53E-30 | 5 LINC00936 | 0.266 |
| 9.42E-34 | 1.195739 | 0.437 | 0.052 | 1.48E-29 | 5 RGS2      | 0.385 |
| 1.00E-33 | 1.720211 | 0.507 | 0.075 | 1.57E-29 | 5 STAB1     | 0.432 |
| 1.91E-33 | 1.765921 | 0.873 | 0.309 | 3.00E-29 | 5 HLA-DQB1  | 0.564 |
| 6.08E-33 | 1.168018 | 0.62  | 0.123 | 9.56E-29 | 5 FGL2      | 0.497 |
| 1.45E-32 | 2.025339 | 0.93  | 0.501 | 2.28E-28 | 5 HLA-DPB1  | 0.429 |
| 2.32E-32 | 0.528162 | 0.296 | 0.019 | 3.66E-28 | 5 NCKAP1L   | 0.277 |
| 3.93E-32 | 1.948128 | 0.93  | 0.538 | 6.17E-28 | 5 HLA-DPA1  | 0.392 |
| 1.60E-31 | 0.684686 | 0.338 | 0.03  | 2.52E-27 | 5 MERTK     | 0.308 |
| 1.66E-31 | 1.460179 | 0.944 | 0.526 | 2.61E-27 | 5 NPC2      | 0.418 |
| 1.85E-31 | 0.776335 | 0.493 | 0.07  | 2.91E-27 | 5 HACD4     | 0.423 |

|          |          |       |       |          |            |       |
|----------|----------|-------|-------|----------|------------|-------|
| 3.01E-31 | 0.908943 | 0.563 | 0.094 | 4.74E-27 | 5 GPSM3    | 0.469 |
| 8.13E-31 | 0.507861 | 0.31  | 0.024 | 1.28E-26 | 5 PAK1     | 0.286 |
| 3.53E-30 | 0.740242 | 0.423 | 0.048 | 5.55E-26 | 5 CD53     | 0.375 |
| 3.84E-30 | 0.947326 | 0.563 | 0.099 | 6.04E-26 | 5 CPM      | 0.464 |
| 5.05E-30 | 0.992158 | 0.592 | 0.118 | 7.95E-26 | 5 HCLS1    | 0.474 |
| 8.35E-30 | 1.02632  | 0.775 | 0.215 | 1.31E-25 | 5 CNPY3    | 0.56  |
| 2.23E-29 | 0.525692 | 0.296 | 0.022 | 3.51E-25 | 5 AOA4     | 0.274 |
| 2.48E-29 | 0.738088 | 0.465 | 0.064 | 3.90E-25 | 5 LCP2     | 0.401 |
| 3.27E-29 | 1.150732 | 1     | 0.981 | 5.14E-25 | 5 FTH1     | 0.019 |
| 8.36E-29 | 1.275517 | 0.944 | 0.335 | 1.31E-24 | 5 S100A4   | 0.609 |
| 8.74E-29 | 0.518925 | 0.338 | 0.032 | 1.37E-24 | 5 DOCK8    | 0.306 |
| 1.34E-28 | 0.783731 | 0.577 | 0.112 | 2.11E-24 | 5 TNFRSF1B | 0.465 |
| 3.29E-28 | 0.607128 | 0.338 | 0.033 | 5.17E-24 | 5 CD48     | 0.305 |
| 4.60E-28 | 1.170096 | 0.479 | 0.078 | 7.24E-24 | 5 NR4A2    | 0.401 |
| 1.80E-27 | 0.625803 | 0.296 | 0.026 | 2.82E-23 | 5 CEBPB    | 0.27  |
| 3.74E-27 | 0.566661 | 0.31  | 0.028 | 5.89E-23 | 5 PLEK     | 0.282 |
| 3.94E-27 | 1.450483 | 0.634 | 0.172 | 6.20E-23 | 5 NAMPT    | 0.462 |
| 5.70E-27 | 0.730115 | 0.451 | 0.069 | 8.97E-23 | 5 RGS19    | 0.382 |
| 6.92E-27 | 0.56502  | 0.268 | 0.02  | 1.09E-22 | 5 ARHGAP9  | 0.248 |
| 7.23E-27 | 0.850205 | 0.493 | 0.086 | 1.14E-22 | 5 FAM49B   | 0.407 |
| 9.77E-27 | 1.54857  | 1     | 0.66  | 1.54E-22 | 5 CD74     | 0.34  |
| 9.86E-27 | 0.687526 | 0.408 | 0.057 | 1.55E-22 | 5 IER5     | 0.351 |
| 1.22E-26 | 0.966189 | 0.592 | 0.135 | 1.92E-22 | 5 LY96     | 0.457 |
| 1.32E-26 | 0.861957 | 0.451 | 0.07  | 2.07E-22 | 5 PTPN6    | 0.381 |
| 1.55E-26 | 0.540982 | 0.282 | 0.023 | 2.44E-22 | 5 ARHGAP30 | 0.259 |
| 1.82E-26 | 1.597291 | 0.704 | 0.232 | 2.86E-22 | 5 IER3     | 0.472 |
| 2.46E-26 | 0.565548 | 0.282 | 0.024 | 3.87E-22 | 5 DAPK1    | 0.258 |
| 2.60E-26 | 0.911174 | 0.662 | 0.163 | 4.09E-22 | 5 CELF2    | 0.499 |
| 2.66E-26 | 0.825821 | 0.394 | 0.053 | 4.19E-22 | 5 ACSL1    | 0.341 |
| 5.27E-26 | 0.608219 | 0.296 | 0.028 | 8.29E-22 | 5 STX11    | 0.268 |
| 9.66E-26 | 0.877886 | 0.972 | 0.898 | 1.52E-21 | 5 OAZ1     | 0.074 |
| 1.17E-25 | 0.602047 | 0.338 | 0.038 | 1.83E-21 | 5 SH3TC1   | 0.3   |
| 1.28E-25 | 1.304069 | 0.817 | 0.316 | 2.02E-21 | 5 HLA-DMA  | 0.501 |
| 2.11E-25 | 0.797938 | 0.507 | 0.097 | 3.32E-21 | 5 HLA-DMB  | 0.41  |
| 3.50E-25 | 0.743431 | 0.352 | 0.043 | 5.51E-21 | 5 NAIP     | 0.309 |
| 5.76E-25 | 0.641058 | 0.479 | 0.084 | 9.06E-21 | 5 CSK      | 0.395 |
| 8.53E-25 | 0.967528 | 0.662 | 0.174 | 1.34E-20 | 5 CD44     | 0.488 |
| 1.06E-24 | 1.441137 | 0.845 | 0.369 | 1.67E-20 | 5 DUSP1    | 0.476 |
| 1.07E-24 | 0.868752 | 0.592 | 0.128 | 1.68E-20 | 5 CTSC     | 0.464 |
| 1.19E-24 | 0.747186 | 0.493 | 0.086 | 1.87E-20 | 5 LIMD2    | 0.407 |
| 2.21E-24 | 1.062828 | 0.986 | 0.515 | 3.47E-20 | 5 SRGN     | 0.471 |
| 3.20E-24 | 1.371941 | 0.859 | 0.448 | 5.03E-20 | 5 CTSB     | 0.411 |
| 4.69E-24 | 0.657528 | 1     | 0.992 | 7.37E-20 | 5 TMSB4X   | 0.008 |
| 5.70E-24 | 0.614212 | 0.282 | 0.028 | 8.97E-20 | 5 DOCK11   | 0.254 |
| 1.84E-23 | 1.535103 | 0.62  | 0.19  | 2.90E-19 | 5 NFKBIZ   | 0.43  |
| 2.97E-23 | 0.67163  | 0.479 | 0.092 | 4.67E-19 | 5 RAB31    | 0.387 |
| 3.06E-23 | 0.866592 | 0.352 | 0.045 | 4.82E-19 | 5 ALOX5AP  | 0.307 |
| 3.60E-23 | 0.551045 | 0.282 | 0.029 | 5.65E-19 | 5 NABP1    | 0.253 |
| 5.35E-23 | 1.026568 | 0.704 | 0.242 | 8.41E-19 | 5 RNF130   | 0.462 |
| 5.52E-23 | 1.143816 | 0.944 | 0.579 | 8.69E-19 | 5 NEAT1    | 0.365 |
| 5.73E-23 | 1.103369 | 0.31  | 0.038 | 9.01E-19 | 5 SLCO2B1  | 0.272 |
| 6.64E-23 | 0.882638 | 0.437 | 0.079 | 1.04E-18 | 5 NUP214   | 0.358 |
| 1.18E-22 | 1.324673 | 0.69  | 0.236 | 1.85E-18 | 5 EGR1     | 0.454 |
| 1.36E-22 | 0.576761 | 0.324 | 0.041 | 2.15E-18 | 5 MPP1     | 0.283 |
| 1.37E-22 | 1.497727 | 0.93  | 0.556 | 2.15E-18 | 5 HLA-DRB1 | 0.374 |
| 1.75E-22 | 0.5699   | 0.324 | 0.041 | 2.75E-18 | 5 SPINT2   | 0.283 |
| 1.87E-22 | 1.090362 | 0.704 | 0.241 | 2.94E-18 | 5 RBPJ     | 0.463 |
| 3.46E-22 | 0.922923 | 0.507 | 0.112 | 5.45E-18 | 5 FRMD4B   | 0.395 |

|          |          |       |       |          |            |       |
|----------|----------|-------|-------|----------|------------|-------|
| 3.80E-22 | 0.703132 | 0.352 | 0.051 | 5.97E-18 | 5 BIRC3    | 0.301 |
| 8.20E-22 | 0.509688 | 0.254 | 0.024 | 1.29E-17 | 5 MYO1F    | 0.23  |
| 3.17E-21 | 0.757874 | 0.549 | 0.135 | 4.98E-17 | 5 RNF149   | 0.414 |
| 3.39E-21 | 1.332515 | 0.69  | 0.24  | 5.33E-17 | 5 SOD2     | 0.45  |
| 4.63E-21 | 0.885643 | 0.718 | 0.268 | 7.28E-17 | 5 RHOG     | 0.45  |
| 6.17E-21 | 0.741211 | 0.986 | 0.82  | 9.70E-17 | 5 GABARAP  | 0.166 |
| 1.64E-20 | 0.611903 | 1     | 0.983 | 2.58E-16 | 5 RPL28    | 0.017 |
| 1.88E-20 | 0.955552 | 0.69  | 0.228 | 2.96E-16 | 5 MFSD1    | 0.462 |
| 1.96E-20 | 0.839684 | 1     | 0.983 | 3.09E-16 | 5 ACTB     | 0.017 |
| 2.39E-20 | 0.942801 | 0.972 | 0.654 | 3.76E-16 | 5 PSAP     | 0.318 |
| 2.46E-20 | 0.907472 | 0.915 | 0.628 | 3.87E-16 | 5 ARPC3    | 0.287 |
| 3.31E-20 | 0.549267 | 1     | 0.992 | 5.20E-16 | 5 RPL39    | 0.008 |
| 4.56E-20 | 0.639967 | 0.366 | 0.06  | 7.17E-16 | 5 TRMT1    | 0.306 |
| 1.03E-19 | 0.712264 | 0.437 | 0.092 | 1.63E-15 | 5 REL      | 0.345 |
| 1.33E-19 | 0.892759 | 0.69  | 0.254 | 2.08E-15 | 5 SAMHD1   | 0.436 |
| 1.42E-19 | 0.581241 | 0.437 | 0.089 | 2.23E-15 | 5 TYMP     | 0.348 |
| 2.24E-19 | 0.613548 | 0.366 | 0.064 | 3.52E-15 | 5 MAN2B1   | 0.302 |
| 5.75E-19 | 0.801036 | 0.549 | 0.157 | 9.04E-15 | 5 ATP2B1   | 0.392 |
| 5.86E-19 | 0.98441  | 0.887 | 0.47  | 9.22E-15 | 5 FCGRT    | 0.417 |
| 7.93E-19 | 0.822404 | 0.958 | 0.838 | 1.25E-14 | 5 SH3BGL3  | 0.12  |
| 8.95E-19 | 0.548606 | 1     | 0.974 | 1.41E-14 | 5 RPL12    | 0.026 |
| 9.70E-19 | 1.026283 | 0.676 | 0.253 | 1.53E-14 | 5 NR4A1    | 0.423 |
| 9.80E-19 | 0.938531 | 0.606 | 0.2   | 1.54E-14 | 5 ZEB2     | 0.406 |
| 2.00E-18 | 1.126322 | 0.507 | 0.139 | 3.14E-14 | 5 ATF3     | 0.368 |
| 3.65E-18 | 0.544041 | 0.958 | 0.944 | 5.74E-14 | 5 ATP5E    | 0.014 |
| 4.24E-18 | 0.900174 | 0.873 | 0.444 | 6.67E-14 | 5 HERPUD1  | 0.429 |
| 5.68E-18 | 0.886071 | 0.887 | 0.524 | 8.93E-14 | 5 GLUL     | 0.363 |
| 6.17E-18 | 0.794158 | 0.873 | 0.521 | 9.70E-14 | 5 SERP1    | 0.352 |
| 8.29E-18 | 0.574146 | 0.282 | 0.04  | 1.30E-13 | 5 ADAP2    | 0.242 |
| 9.57E-18 | 0.889238 | 0.634 | 0.225 | 1.50E-13 | 5 BLVRB    | 0.409 |
| 9.77E-18 | 0.703056 | 0.38  | 0.073 | 1.54E-13 | 5 IQGAP2   | 0.307 |
| 2.31E-17 | 0.783312 | 0.662 | 0.243 | 3.63E-13 | 5 NCOA4    | 0.419 |
| 2.44E-17 | 0.790744 | 0.563 | 0.173 | 3.84E-13 | 5 CYBA     | 0.39  |
| 2.74E-17 | 0.622106 | 0.465 | 0.115 | 4.31E-13 | 5 ATP6V1B2 | 0.35  |
| 3.82E-17 | 0.933813 | 0.901 | 0.666 | 6.01E-13 | 5 PABPC1   | 0.235 |
| 4.88E-17 | 0.839729 | 0.563 | 0.188 | 7.67E-13 | 5 AP1S2    | 0.375 |
| 5.63E-17 | 0.873204 | 0.479 | 0.125 | 8.85E-13 | 5 RNF144B  | 0.354 |
| 6.32E-17 | 0.598031 | 0.352 | 0.068 | 9.95E-13 | 5 TNFAIP2  | 0.284 |
| 6.94E-17 | 0.705428 | 1     | 0.89  | 1.09E-12 | 5 PFN1     | 0.11  |
| 7.41E-17 | 1.044253 | 0.887 | 0.577 | 1.17E-12 | 5 FOS      | 0.31  |
| 8.29E-17 | 1.151824 | 0.775 | 0.371 | 1.30E-12 | 5 FOSB     | 0.404 |
| 8.73E-17 | 0.738372 | 0.69  | 0.252 | 1.37E-12 | 5 GMFG     | 0.438 |
| 2.07E-16 | 0.738998 | 0.803 | 0.368 | 3.25E-12 | 5 FKBP5    | 0.435 |
| 2.30E-16 | 0.766455 | 0.423 | 0.101 | 3.62E-12 | 5 OGFRL1   | 0.322 |
| 2.72E-16 | 0.56852  | 0.408 | 0.092 | 4.27E-12 | 5 CCDC88A  | 0.316 |
| 3.14E-16 | 1.310719 | 0.873 | 0.504 | 4.93E-12 | 5 HLA-DRB5 | 0.369 |
| 4.00E-16 | 0.778297 | 0.465 | 0.127 | 6.30E-12 | 5 MTSS1    | 0.338 |
| 5.71E-16 | 0.835837 | 0.845 | 0.463 | 8.97E-12 | 5 GRN      | 0.382 |
| 8.90E-16 | 0.558462 | 0.986 | 0.915 | 1.40E-11 | 5 RPS9     | 0.071 |
| 9.04E-16 | 0.751806 | 0.718 | 0.299 | 1.42E-11 | 5 PNRC1    | 0.419 |
| 9.33E-16 | 0.681145 | 0.394 | 0.091 | 1.47E-11 | 5 CAB39    | 0.303 |
| 9.46E-16 | 0.890051 | 0.831 | 0.449 | 1.49E-11 | 5 TSPO     | 0.382 |
| 1.06E-15 | 0.831839 | 0.718 | 0.302 | 1.67E-11 | 5 KCTD12   | 0.416 |
| 1.33E-15 | 0.995739 | 0.859 | 0.704 | 2.09E-11 | 5 NFKBIA   | 0.155 |
| 1.33E-15 | 0.768193 | 0.845 | 0.518 | 2.09E-11 | 5 ARPC1B   | 0.327 |
| 1.42E-15 | 1.167803 | 0.394 | 0.102 | 2.23E-11 | 5 MAF      | 0.292 |
| 1.84E-15 | 0.59123  | 0.324 | 0.064 | 2.89E-11 | 5 GAA      | 0.26  |
| 2.36E-15 | 1.225185 | 0.704 | 0.345 | 3.70E-11 | 5 PPP1R15A | 0.359 |



|          |          |       |       |          |            |       |
|----------|----------|-------|-------|----------|------------|-------|
| 3.54E-15 | 0.503997 | 1     | 0.976 | 5.57E-11 | 5 RPS24    | 0.024 |
| 3.90E-15 | 0.725227 | 0.93  | 0.563 | 6.13E-11 | 5 ARPC5    | 0.367 |
| 4.01E-15 | 0.620581 | 0.437 | 0.112 | 6.30E-11 | 5 STK17B   | 0.325 |
| 4.18E-15 | 0.671337 | 0.535 | 0.17  | 6.58E-11 | 5 CD302    | 0.365 |
| 5.16E-15 | 0.949419 | 0.451 | 0.123 | 8.12E-11 | 5 CD52     | 0.328 |
| 1.83E-14 | 1.182061 | 0.592 | 0.247 | 2.87E-10 | 5 DAB2     | 0.345 |
| 1.86E-14 | 0.838653 | 0.648 | 0.272 | 2.93E-10 | 5 ZFAND5   | 0.376 |
| 2.05E-14 | 0.636705 | 0.324 | 0.067 | 3.22E-10 | 5 PTPRE    | 0.257 |
| 3.76E-14 | 1.128375 | 0.775 | 0.408 | 5.92E-10 | 5 CTSD     | 0.367 |
| 4.33E-14 | 0.514938 | 0.268 | 0.046 | 6.81E-10 | 5 UBXN11   | 0.222 |
| 6.31E-14 | 1.519316 | 0.254 | 0.043 | 9.93E-10 | 5 AREG     | 0.211 |
| 7.90E-14 | 0.787408 | 0.62  | 0.256 | 1.24E-09 | 5 NUDT16   | 0.364 |
| 1.73E-13 | 0.615809 | 0.493 | 0.157 | 2.71E-09 | 5 LGALS9   | 0.336 |
| 3.40E-13 | 0.707636 | 0.761 | 0.445 | 5.35E-09 | 5 AP2S1    | 0.316 |
| 8.33E-13 | 0.51065  | 0.437 | 0.128 | 1.31E-08 | 5 VMA21    | 0.309 |
| 9.56E-13 | 0.61842  | 0.338 | 0.083 | 1.50E-08 | 5 PGD      | 0.255 |
| 9.99E-13 | 0.763712 | 0.732 | 0.41  | 1.57E-08 | 5 ATP6V0B  | 0.322 |
| 1.26E-12 | 0.656391 | 0.479 | 0.162 | 1.98E-08 | 5 AHR      | 0.317 |
| 1.64E-12 | 0.685547 | 0.873 | 0.591 | 2.59E-08 | 5 ATP6V0C  | 0.282 |
| 2.54E-12 | 0.548181 | 0.366 | 0.099 | 3.99E-08 | 5 KDM6B    | 0.267 |
| 6.00E-12 | 0.54957  | 0.507 | 0.173 | 9.44E-08 | 5 DPYD     | 0.334 |
| 6.30E-12 | 0.69831  | 0.563 | 0.232 | 9.91E-08 | 5 TPP1     | 0.331 |
| 6.72E-12 | 0.735501 | 0.577 | 0.242 | 1.06E-07 | 5 FAM96A   | 0.335 |
| 7.23E-12 | 1.130893 | 0.535 | 0.206 | 1.14E-07 | 5 CXCL2    | 0.329 |
| 8.31E-12 | 0.656245 | 0.408 | 0.123 | 1.31E-07 | 5 CHMP1B   | 0.285 |
| 1.56E-11 | 0.58044  | 0.901 | 0.703 | 2.46E-07 | 5 RPL36A   | 0.198 |
| 1.86E-11 | 0.651799 | 0.535 | 0.2   | 2.93E-07 | 5 GRINA    | 0.335 |
| 2.16E-11 | 0.649361 | 0.817 | 0.498 | 3.40E-07 | 5 TPM3     | 0.319 |
| 2.79E-11 | 0.857753 | 0.38  | 0.12  | 4.38E-07 | 5 NINJ1    | 0.26  |
| 4.14E-11 | 0.842    | 0.296 | 0.074 | 6.50E-07 | 5 ABHD5    | 0.222 |
| 5.08E-11 | 0.620202 | 0.563 | 0.233 | 7.99E-07 | 5 CEBPD    | 0.33  |
| 6.31E-11 | 0.660225 | 0.451 | 0.159 | 9.92E-07 | 5 CKLF     | 0.292 |
| 6.56E-11 | 0.588232 | 0.521 | 0.197 | 1.03E-06 | 5 SERPINB1 | 0.324 |
| 6.59E-11 | 0.709315 | 0.761 | 0.467 | 1.04E-06 | 5 ZFAS1    | 0.294 |
| 8.78E-11 | 0.738914 | 0.366 | 0.115 | 1.38E-06 | 5 SESN1    | 0.251 |
| 9.18E-11 | 0.535045 | 0.38  | 0.116 | 1.44E-06 | 5 EIF4EBP1 | 0.264 |
| 1.08E-10 | 0.641775 | 0.507 | 0.213 | 1.70E-06 | 5 M6PR     | 0.294 |
| 1.32E-10 | 1.006142 | 0.521 | 0.239 | 2.08E-06 | 5 LIPA     | 0.282 |
| 1.33E-10 | 0.64475  | 0.521 | 0.211 | 2.09E-06 | 5 ZYX      | 0.31  |
| 1.33E-10 | 0.735538 | 0.634 | 0.335 | 2.10E-06 | 5 MCL1     | 0.299 |
| 1.48E-10 | 0.514811 | 0.38  | 0.116 | 2.32E-06 | 5 MAP3K8   | 0.264 |
| 1.61E-10 | 0.500262 | 0.366 | 0.106 | 2.53E-06 | 5 LYST     | 0.26  |
| 1.85E-10 | 0.568235 | 0.437 | 0.153 | 2.91E-06 | 5 HNMT     | 0.284 |
| 2.05E-10 | 0.753172 | 0.577 | 0.251 | 3.22E-06 | 5 TGFBI    | 0.326 |
| 2.06E-10 | 0.837457 | 0.521 | 0.231 | 3.24E-06 | 5 TKT      | 0.29  |
| 2.08E-10 | 0.656518 | 0.352 | 0.106 | 3.26E-06 | 5 INSIG1   | 0.246 |
| 2.57E-10 | 0.567369 | 0.394 | 0.132 | 4.04E-06 | 5 GCA      | 0.262 |
| 2.65E-10 | 0.690013 | 0.789 | 0.502 | 4.17E-06 | 5 RPS2     | 0.287 |
| 4.57E-10 | 0.680767 | 0.775 | 0.511 | 7.19E-06 | 5 YBX1     | 0.264 |
| 4.84E-10 | 0.652622 | 0.423 | 0.149 | 7.62E-06 | 5 CTSZ     | 0.274 |
| 6.72E-10 | 0.650133 | 0.479 | 0.184 | 1.06E-05 | 5 CD55     | 0.295 |
| 8.13E-10 | 0.549106 | 0.479 | 0.186 | 1.28E-05 | 5 CAPZA1   | 0.293 |
| 1.05E-09 | 0.504758 | 0.761 | 0.43  | 1.65E-05 | 5 CAP1     | 0.331 |
| 1.21E-09 | 0.542074 | 0.606 | 0.289 | 1.90E-05 | 5 MOB1A    | 0.317 |
| 1.38E-09 | 0.740681 | 0.296 | 0.083 | 2.18E-05 | 5 TMEM176F | 0.213 |
| 1.49E-09 | 0.530461 | 0.479 | 0.189 | 2.34E-05 | 5 WIPF1    | 0.29  |
| 1.67E-09 | 0.549064 | 0.408 | 0.139 | 2.62E-05 | 5 IVNS1ABP | 0.269 |
| 1.77E-09 | 0.521319 | 0.394 | 0.136 | 2.79E-05 | 5 SSH2     | 0.258 |

|           |          |       |       |           |            |       |
|-----------|----------|-------|-------|-----------|------------|-------|
| 2.23E-09  | 1.254339 | 0.38  | 0.148 | 3.50E-05  | 5 LGMN     | 0.232 |
| 4.35E-09  | 0.63005  | 0.817 | 0.67  | 6.84E-05  | 5 ARPC2    | 0.147 |
| 4.66E-09  | 0.759505 | 0.62  | 0.357 | 7.33E-05  | 5 C10orf54 | 0.263 |
| 6.48E-09  | 0.504653 | 0.352 | 0.12  | 0.000102  | 5 PLEKHB2  | 0.232 |
| 6.52E-09  | 0.525979 | 0.507 | 0.217 | 0.000103  | 5 GRB2     | 0.29  |
| 1.19E-08  | 0.607555 | 0.394 | 0.154 | 0.000187  | 5 RILPL2   | 0.24  |
| 1.29E-08  | 0.682164 | 0.803 | 0.585 | 0.000203  | 5 KLF6     | 0.218 |
| 1.72E-08  | 0.6013   | 0.352 | 0.123 | 0.00027   | 5 EIF4A3   | 0.229 |
| 1.99E-08  | 0.529084 | 0.69  | 0.406 | 0.000312  | 5 PRR13    | 0.284 |
| 2.86E-08  | 0.519163 | 0.676 | 0.388 | 0.00045   | 5 ACTR3    | 0.288 |
| 7.49E-08  | 0.54459  | 0.324 | 0.112 | 0.001177  | 5 RASSF4   | 0.212 |
| 9.79E-08  | 1.091983 | 0.465 | 0.237 | 0.00154   | 5 SLC40A1  | 0.228 |
| 2.53E-07  | 0.859285 | 0.338 | 0.132 | 0.003977  | 5 MAN1A1   | 0.206 |
| 5.10E-07  | 0.505668 | 0.606 | 0.34  | 0.008016  | 5 CMTM6    | 0.266 |
| 5.31E-07  | 0.566747 | 0.451 | 0.216 | 0.008357  | 5 RB1      | 0.235 |
| 6.34E-07  | 0.507805 | 0.38  | 0.16  | 0.009976  | 5 KIAA1033 | 0.22  |
| 6.63E-07  | 0.555721 | 0.972 | 0.866 | 0.010422  | 5 S100A6   | 0.106 |
| 3.28E-188 | 2.634181 | 0.891 | 0.005 | 5.16E-184 | 6 ACKR1    | 0.886 |
| 3.31E-51  | 1.459836 | 0.652 | 0.054 | 5.20E-47  | 6 PLAT     | 0.598 |
| 5.76E-50  | 1.950079 | 0.913 | 0.138 | 9.06E-46  | 6 PLVAP    | 0.775 |
| 6.31E-47  | 0.880012 | 0.348 | 0.011 | 9.93E-43  | 6 ADGRG6   | 0.337 |
| 6.18E-45  | 1.039393 | 0.478 | 0.028 | 9.71E-41  | 6 SELP     | 0.45  |
| 1.22E-43  | 0.791112 | 0.348 | 0.013 | 1.92E-39  | 6 LHX6     | 0.335 |
| 5.99E-42  | 0.748951 | 0.348 | 0.013 | 9.42E-38  | 6 CRTAC1   | 0.335 |
| 5.22E-39  | 1.307496 | 0.652 | 0.078 | 8.21E-35  | 6 SLCO2A1  | 0.574 |
| 1.73E-35  | 0.806287 | 0.348 | 0.018 | 2.73E-31  | 6 MPZL2    | 0.33  |
| 4.87E-28  | 0.919517 | 0.326 | 0.023 | 7.66E-24  | 6 CCL14    | 0.303 |
| 9.62E-28  | 1.481952 | 0.978 | 0.39  | 1.51E-23  | 6 RAMP3    | 0.588 |
| 1.02E-27  | 0.882135 | 0.413 | 0.04  | 1.60E-23  | 6 RASA4    | 0.373 |
| 3.62E-26  | 1.557939 | 0.87  | 0.297 | 5.69E-22  | 6 DUSP23   | 0.573 |
| 5.72E-26  | 0.97782  | 0.522 | 0.075 | 8.99E-22  | 6 TPO      | 0.447 |
| 1.17E-25  | 1.467112 | 0.891 | 0.274 | 1.84E-21  | 6 TGM2     | 0.617 |
| 1.99E-23  | 0.94475  | 0.543 | 0.089 | 3.14E-19  | 6 TFF3     | 0.454 |
| 6.94E-23  | 1.462034 | 0.87  | 0.297 | 1.09E-18  | 6 HYAL2    | 0.573 |
| 2.88E-20  | 1.093621 | 0.978 | 0.49  | 4.53E-16  | 6 PECAM1   | 0.488 |
| 3.69E-20  | 1.00815  | 0.761 | 0.217 | 5.81E-16  | 6 CXorf36  | 0.544 |
| 7.74E-20  | 1.322259 | 0.935 | 0.462 | 1.22E-15  | 6 IGFBP4   | 0.473 |
| 1.43E-19  | 1.188114 | 0.522 | 0.106 | 2.24E-15  | 6 FAM167B  | 0.416 |
| 1.13E-18  | 1.211296 | 0.935 | 0.434 | 1.78E-14  | 6 CALCRL   | 0.501 |
| 5.18E-18  | 1.201186 | 0.674 | 0.197 | 8.15E-14  | 6 THBD     | 0.477 |
| 1.71E-17  | 0.648606 | 0.391 | 0.06  | 2.68E-13  | 6 EPB41L3  | 0.331 |
| 1.74E-16  | 0.577758 | 0.283 | 0.033 | 2.74E-12  | 6 ITGB4    | 0.25  |
| 2.94E-16  | 0.660758 | 0.348 | 0.051 | 4.62E-12  | 6 PTPN5    | 0.297 |
| 3.76E-15  | 0.987983 | 0.891 | 0.475 | 5.91E-11  | 6 TGFBR2   | 0.416 |
| 3.81E-15  | 0.816658 | 0.609 | 0.171 | 6.00E-11  | 6 CREB3L1  | 0.438 |
| 8.89E-15  | 0.963074 | 0.848 | 0.372 | 1.40E-10  | 6 PRCP     | 0.476 |
| 2.16E-14  | 1.01199  | 0.587 | 0.173 | 3.39E-10  | 6 CDA      | 0.414 |
| 9.74E-14  | 0.943982 | 0.978 | 0.571 | 1.53E-09  | 6 MT1X     | 0.407 |
| 1.25E-13  | 0.797074 | 0.804 | 0.307 | 1.97E-09  | 6 SNCG     | 0.497 |
| 1.64E-13  | 0.788978 | 0.587 | 0.172 | 2.58E-09  | 6 NOSTRIN  | 0.415 |
| 2.88E-13  | 0.956637 | 0.587 | 0.176 | 4.53E-09  | 6 SEPN1    | 0.411 |
| 4.04E-13  | 0.607685 | 0.348 | 0.064 | 6.36E-09  | 6 SPNS2    | 0.284 |
| 4.46E-13  | 0.94982  | 0.652 | 0.216 | 7.01E-09  | 6 ISLR     | 0.436 |
| 5.55E-13  | 0.64679  | 0.261 | 0.037 | 8.73E-09  | 6 HAPLN3   | 0.224 |
| 8.19E-13  | 0.629046 | 0.978 | 0.932 | 1.29E-08  | 6 RPS6     | 0.046 |
| 8.85E-13  | 0.74602  | 0.457 | 0.113 | 1.39E-08  | 6 BCL3     | 0.344 |
| 1.09E-12  | 0.797215 | 0.543 | 0.164 | 1.72E-08  | 6 TSHZ2    | 0.379 |
| 1.25E-12  | 0.627097 | 0.304 | 0.051 | 1.97E-08  | 6 CYSLTR1  | 0.253 |

|          |          |       |       |          |             |       |
|----------|----------|-------|-------|----------|-------------|-------|
| 1.71E-12 | 0.789301 | 0.478 | 0.126 | 2.69E-08 | 6 APLNR     | 0.352 |
| 2.13E-12 | 0.74124  | 0.935 | 0.762 | 3.35E-08 | 6 FKBP1A    | 0.173 |
| 2.19E-12 | 0.842375 | 0.652 | 0.243 | 3.44E-08 | 6 ARL4A     | 0.409 |
| 2.26E-12 | 0.725967 | 0.587 | 0.187 | 3.56E-08 | 6 SULF2     | 0.4   |
| 2.31E-12 | 0.752713 | 0.696 | 0.249 | 3.63E-08 | 6 TM4SF18   | 0.447 |
| 3.15E-12 | 0.84392  | 0.5   | 0.142 | 4.95E-08 | 6 C10orf128 | 0.358 |
| 3.63E-12 | 0.790593 | 0.261 | 0.039 | 5.72E-08 | 6 CPXM2     | 0.222 |
| 4.59E-12 | 0.880029 | 0.978 | 0.503 | 7.22E-08 | 6 VWF       | 0.475 |
| 9.66E-12 | 0.73102  | 0.696 | 0.278 | 1.52E-07 | 6 MMRN2     | 0.418 |
| 1.10E-11 | 0.853317 | 0.804 | 0.363 | 1.73E-07 | 6 PTPRB     | 0.441 |
| 1.60E-11 | 0.673451 | 0.413 | 0.098 | 2.52E-07 | 6 VWA1      | 0.315 |
| 3.16E-11 | 0.775847 | 0.457 | 0.13  | 4.97E-07 | 6 EHD4      | 0.327 |
| 3.26E-11 | 0.620833 | 0.283 | 0.049 | 5.13E-07 | 6 FAM84B    | 0.234 |
| 3.65E-11 | 0.864342 | 0.87  | 0.512 | 5.74E-07 | 6 IL6ST     | 0.358 |
| 4.67E-11 | 0.756244 | 0.804 | 0.407 | 7.35E-07 | 6 LIMS2     | 0.397 |
| 5.74E-11 | 0.722068 | 0.674 | 0.282 | 9.03E-07 | 6 ELK3      | 0.392 |
| 7.06E-11 | 0.620429 | 0.413 | 0.103 | 1.11E-06 | 6 NUAK1     | 0.31  |
| 8.64E-11 | 0.775842 | 0.609 | 0.221 | 1.36E-06 | 6 ROBO4     | 0.388 |
| 9.07E-11 | 0.693367 | 0.783 | 0.346 | 1.43E-06 | 6 ADGRL4    | 0.437 |
| 1.23E-10 | 0.560901 | 0.913 | 0.489 | 1.93E-06 | 6 HLA-DRA   | 0.424 |
| 1.43E-10 | 0.7052   | 0.413 | 0.107 | 2.25E-06 | 6 TGFBR3    | 0.306 |
| 1.66E-10 | 0.83291  | 0.717 | 0.323 | 2.61E-06 | 6 NPDC1     | 0.394 |
| 4.20E-10 | 0.680677 | 0.522 | 0.168 | 6.61E-06 | 6 FLNB      | 0.354 |
| 5.58E-10 | 0.564266 | 0.413 | 0.11  | 8.78E-06 | 6 LYST      | 0.303 |
| 7.86E-10 | 0.50604  | 0.304 | 0.063 | 1.24E-05 | 6 BCAR1     | 0.241 |
| 9.60E-10 | 0.631728 | 1     | 0.669 | 1.51E-05 | 6 CD74      | 0.331 |
| 1.09E-09 | 0.715265 | 0.674 | 0.289 | 1.72E-05 | 6 IL33      | 0.385 |
| 1.33E-09 | 0.64305  | 0.543 | 0.187 | 2.09E-05 | 6 NAMPT     | 0.356 |
| 2.21E-09 | 0.772342 | 0.565 | 0.216 | 3.48E-05 | 6 PRSS23    | 0.349 |
| 2.51E-09 | 0.938802 | 0.652 | 0.297 | 3.95E-05 | 6 LIFR      | 0.355 |
| 3.23E-09 | 0.657486 | 0.5   | 0.166 | 5.08E-05 | 6 SEMA6A    | 0.334 |
| 4.28E-09 | 0.981854 | 0.761 | 0.394 | 6.73E-05 | 6 MT1M      | 0.367 |
| 6.26E-09 | 0.63842  | 0.522 | 0.187 | 9.84E-05 | 6 SHC1      | 0.335 |
| 7.33E-09 | 0.520761 | 0.435 | 0.134 | 0.000115 | 6 LRP5      | 0.301 |
| 8.78E-09 | 0.610353 | 0.435 | 0.137 | 0.000138 | 6 MGAT4A    | 0.298 |
| 8.85E-09 | 0.547174 | 0.5   | 0.177 | 0.000139 | 6 ERG       | 0.323 |
| 2.05E-08 | 0.502241 | 0.391 | 0.116 | 0.000322 | 6 ST6GAL1   | 0.275 |
| 2.26E-08 | 0.719351 | 0.457 | 0.159 | 0.000356 | 6 EPHB4     | 0.298 |
| 3.20E-08 | 0.839057 | 0.348 | 0.098 | 0.000503 | 6 TMEM176A  | 0.25  |
| 3.38E-08 | 0.504981 | 0.63  | 0.27  | 0.000531 | 6 PLEC      | 0.36  |
| 3.38E-08 | 0.579035 | 0.37  | 0.105 | 0.000531 | 6 ENTPD1    | 0.265 |
| 3.67E-08 | 0.545881 | 0.413 | 0.135 | 0.000577 | 6 CMIP      | 0.278 |
| 3.72E-08 | 0.758416 | 0.565 | 0.246 | 0.000586 | 6 MALL      | 0.319 |
| 4.84E-08 | 0.606269 | 0.565 | 0.236 | 0.000761 | 6 TRIOBP    | 0.329 |
| 6.14E-08 | 0.805854 | 0.826 | 0.55  | 0.000965 | 6 MT1E      | 0.276 |
| 6.31E-08 | 0.645039 | 0.913 | 0.679 | 0.000992 | 6 CD59      | 0.234 |
| 6.69E-08 | 0.501035 | 0.457 | 0.16  | 0.001052 | 6 HLA-DQA1  | 0.297 |
| 7.93E-08 | 0.676756 | 0.674 | 0.329 | 0.001247 | 6 HEG1      | 0.345 |
| 9.50E-08 | 0.555236 | 0.348 | 0.103 | 0.001493 | 6 TMEM255E  | 0.245 |
| 9.86E-08 | 0.581463 | 0.478 | 0.178 | 0.00155  | 6 PREX2     | 0.3   |
| 1.10E-07 | 0.552509 | 0.37  | 0.115 | 0.001735 | 6 EGLN1     | 0.255 |
| 1.11E-07 | 0.615623 | 0.565 | 0.245 | 0.001738 | 6 CPD       | 0.32  |
| 1.11E-07 | 0.656003 | 0.696 | 0.38  | 0.001751 | 6 TNFRSF1A  | 0.316 |
| 1.13E-07 | 0.547755 | 0.913 | 0.518 | 0.001775 | 6 ITM2A     | 0.395 |
| 1.63E-07 | 0.708904 | 0.63  | 0.321 | 0.002562 | 6 BMPR2     | 0.309 |
| 2.10E-07 | 0.509364 | 0.304 | 0.082 | 0.003297 | 6 TPD52L1   | 0.222 |
| 2.70E-07 | 0.701327 | 0.457 | 0.175 | 0.004253 | 6 PIEZO1    | 0.282 |
| 2.85E-07 | 0.71022  | 0.652 | 0.351 | 0.004479 | 6 ADAM15    | 0.301 |

|           |          |       |       |           |             |       |
|-----------|----------|-------|-------|-----------|-------------|-------|
| 2.99E-07  | 0.536554 | 0.978 | 0.865 | 0.004703  | 6 TXNIP     | 0.113 |
| 3.24E-07  | 0.878614 | 0.413 | 0.144 | 0.005089  | 6 STC1      | 0.269 |
| 3.75E-07  | 0.563417 | 0.609 | 0.284 | 0.00589   | 6 MARCKS    | 0.325 |
| 4.47E-07  | 0.708996 | 0.435 | 0.169 | 0.007023  | 6 MKNK2     | 0.266 |
| 1.17E-06  | 0.543596 | 0.261 | 0.069 | 0.018358  | 6 IKBKB     | 0.192 |
| 1.20E-06  | 0.759535 | 0.37  | 0.135 | 0.018909  | 6 IL1R1     | 0.235 |
| 1.96E-06  | 0.553783 | 0.696 | 0.402 | 0.030896  | 6 PEA15     | 0.294 |
| 2.51E-06  | 0.500716 | 0.348 | 0.119 | 0.039476  | 6 RAPH1     | 0.229 |
| 2.60E-06  | 0.727478 | 0.435 | 0.175 | 0.040839  | 6 TBCD      | 0.26  |
| 2.20E-166 | 2.102878 | 0.852 | 0.005 | 3.45E-162 | 7 NRG1      | 0.847 |
| 1.12E-157 | 1.34526  | 0.667 | 0     | 1.76E-153 | 7 PKHD1L1   | 0.667 |
| 3.10E-149 | 1.730852 | 0.667 | 0.001 | 4.87E-145 | 7 SLC6A4    | 0.666 |
| 9.38E-142 | 1.328436 | 0.667 | 0.002 | 1.48E-137 | 7 SMOC1     | 0.665 |
| 2.86E-127 | 1.56744  | 0.926 | 0.017 | 4.49E-123 | 7 BMX       | 0.909 |
| 2.54E-120 | 1.285304 | 0.63  | 0.004 | 3.99E-116 | 7 MUM1L1    | 0.626 |
| 2.50E-105 | 1.796795 | 0.63  | 0.007 | 3.93E-101 | 7 NPR3      | 0.623 |
| 3.35E-105 | 0.91535  | 0.444 | 0     | 5.28E-101 | 7 SFRP5     | 0.444 |
| 3.35E-105 | 0.719201 | 0.444 | 0     | 5.28E-101 | 7 PLXNA4    | 0.444 |
| 1.13E-92  | 1.067953 | 0.593 | 0.008 | 1.78E-88  | 7 BCO2      | 0.585 |
| 3.73E-90  | 1.763217 | 0.852 | 0.026 | 5.87E-86  | 7 SELP      | 0.826 |
| 1.16E-89  | 1.543924 | 0.704 | 0.015 | 1.83E-85  | 7 GDF7      | 0.689 |
| 1.02E-83  | 1.004677 | 0.444 | 0.003 | 1.60E-79  | 7 BMPER     | 0.441 |
| 9.61E-80  | 1.359052 | 0.593 | 0.011 | 1.51E-75  | 7 PCDH7     | 0.582 |
| 3.68E-79  | 0.657431 | 0.333 | 0     | 5.79E-75  | 7 RP11-767L | 0.333 |
| 1.81E-76  | 2.494516 | 0.889 | 0.042 | 2.85E-72  | 7 EDN1      | 0.847 |
| 1.66E-70  | 0.915956 | 0.296 | 0     | 2.60E-66  | 7 SOST      | 0.296 |
| 1.87E-65  | 1.620733 | 0.815 | 0.041 | 2.94E-61  | 7 SCD5      | 0.774 |
| 1.07E-64  | 1.196649 | 0.556 | 0.014 | 1.68E-60  | 7 BMP6      | 0.542 |
| 1.42E-62  | 0.697388 | 0.296 | 0.001 | 2.23E-58  | 7 F5        | 0.295 |
| 1.62E-62  | 0.536935 | 0.296 | 0.001 | 2.55E-58  | 7 SLC26A7   | 0.295 |
| 3.36E-62  | 1.508136 | 0.704 | 0.029 | 5.28E-58  | 7 CLDN11    | 0.675 |
| 7.23E-62  | 0.612719 | 0.259 | 0     | 1.14E-57  | 7 VAT1L     | 0.259 |
| 7.23E-62  | 0.578243 | 0.259 | 0     | 1.14E-57  | 7 HHIP      | 0.259 |
| 1.81E-59  | 1.554916 | 0.444 | 0.009 | 2.85E-55  | 7 IL1RL1    | 0.435 |
| 1.12E-58  | 1.224839 | 0.741 | 0.036 | 1.77E-54  | 7 PTGS1     | 0.705 |
| 2.35E-54  | 0.537744 | 0.333 | 0.004 | 3.70E-50  | 7 DAPL1     | 0.329 |
| 4.23E-54  | 0.727374 | 0.37  | 0.006 | 6.65E-50  | 7 NR2F1     | 0.364 |
| 5.14E-54  | 0.908429 | 0.556 | 0.019 | 8.08E-50  | 7 MPZL2     | 0.537 |
| 1.59E-46  | 0.553596 | 0.296 | 0.004 | 2.50E-42  | 7 MOV10L1   | 0.292 |
| 1.09E-45  | 0.90355  | 0.519 | 0.021 | 1.72E-41  | 7 PLCXD3    | 0.498 |
| 1.08E-43  | 0.530395 | 0.333 | 0.007 | 1.70E-39  | 7 IRF6      | 0.326 |
| 8.00E-43  | 1.248541 | 0.667 | 0.044 | 1.26E-38  | 7 SPINT2    | 0.623 |
| 1.01E-42  | 0.91964  | 0.593 | 0.032 | 1.59E-38  | 7 ART4      | 0.561 |
| 1.63E-42  | 0.981186 | 0.444 | 0.016 | 2.56E-38  | 7 DNASE1L3  | 0.428 |
| 4.82E-41  | 1.44754  | 0.778 | 0.067 | 7.58E-37  | 7 CDH11     | 0.711 |
| 2.98E-37  | 0.851567 | 0.37  | 0.012 | 4.68E-33  | 7 RHOU      | 0.358 |
| 1.08E-35  | 1.519478 | 0.926 | 0.122 | 1.69E-31  | 7 LEPR      | 0.804 |
| 3.40E-35  | 1.159218 | 0.593 | 0.044 | 5.35E-31  | 7 FBLIM1    | 0.549 |
| 4.07E-35  | 1.024398 | 0.63  | 0.048 | 6.40E-31  | 7 FOXC1     | 0.582 |
| 8.11E-35  | 0.865721 | 0.333 | 0.01  | 1.28E-30  | 7 GDF6      | 0.323 |
| 8.60E-34  | 0.685978 | 0.407 | 0.018 | 1.35E-29  | 7 CRTAC1    | 0.389 |
| 1.56E-33  | 0.67959  | 0.444 | 0.023 | 2.46E-29  | 7 KRT8      | 0.421 |
| 2.29E-33  | 0.633162 | 0.519 | 0.032 | 3.61E-29  | 7 KRT18     | 0.487 |
| 2.06E-32  | 1.995705 | 0.963 | 0.153 | 3.24E-28  | 7 EFEMP1    | 0.81  |
| 1.40E-29  | 1.354086 | 0.852 | 0.116 | 2.21E-25  | 7 MGST1     | 0.736 |
| 2.43E-29  | 1.103477 | 0.815 | 0.11  | 3.82E-25  | 7 CDH13     | 0.705 |
| 8.40E-29  | 0.941012 | 0.481 | 0.034 | 1.32E-24  | 7 MMRN1     | 0.447 |
| 1.86E-28  | 1.470825 | 0.778 | 0.105 | 2.92E-24  | 7 BMP4      | 0.673 |

|          |          |       |       |          |             |       |
|----------|----------|-------|-------|----------|-------------|-------|
| 1.29E-27 | 0.598057 | 0.407 | 0.024 | 2.03E-23 | 7 RAB11FIP1 | 0.383 |
| 1.98E-26 | 0.736499 | 0.444 | 0.031 | 3.11E-22 | 7 CGNL1     | 0.413 |
| 3.10E-26 | 1.938139 | 1     | 0.227 | 4.87E-22 | 7 CLU       | 0.773 |
| 8.83E-26 | 0.942164 | 0.704 | 0.088 | 1.39E-21 | 7 STAB1     | 0.616 |
| 9.00E-25 | 0.658577 | 0.444 | 0.033 | 1.42E-20 | 7 SHISA3    | 0.411 |
| 1.26E-23 | 0.767378 | 0.593 | 0.066 | 1.97E-19 | 7 MAOA      | 0.527 |
| 2.04E-23 | 0.558848 | 0.333 | 0.019 | 3.21E-19 | 7 MAN1C1    | 0.314 |
| 2.49E-23 | 1.200993 | 0.889 | 0.153 | 3.91E-19 | 7 POSTN     | 0.736 |
| 4.48E-23 | 1.18879  | 0.741 | 0.11  | 7.05E-19 | 7 MATN2     | 0.631 |
| 6.80E-23 | 1.059831 | 0.444 | 0.038 | 1.07E-18 | 7 CP        | 0.406 |
| 8.64E-23 | 0.771545 | 0.407 | 0.031 | 1.36E-18 | 7 DAPK1     | 0.376 |
| 9.36E-23 | 1.83561  | 0.926 | 0.205 | 1.47E-18 | 7 CTGF      | 0.721 |
| 1.57E-22 | 0.632406 | 0.407 | 0.03  | 2.47E-18 | 7 KCNT2     | 0.377 |
| 3.67E-22 | 1.643252 | 0.889 | 0.208 | 5.77E-18 | 7 CRIM1     | 0.681 |
| 2.17E-21 | 0.961785 | 0.556 | 0.065 | 3.42E-17 | 7 TNFRSF21  | 0.491 |
| 1.23E-20 | 2.131778 | 0.852 | 0.197 | 1.93E-16 | 7 ELN       | 0.655 |
| 2.74E-20 | 0.856755 | 0.667 | 0.096 | 4.31E-16 | 7 LTC4S     | 0.571 |
| 4.97E-20 | 1.058369 | 0.63  | 0.095 | 7.81E-16 | 7 SNTB2     | 0.535 |
| 1.17E-19 | 1.912868 | 0.852 | 0.212 | 1.84E-15 | 7 CXCL2     | 0.64  |
| 2.06E-19 | 0.552366 | 0.444 | 0.044 | 3.24E-15 | 7 SLC25A29  | 0.4   |
| 2.34E-19 | 0.520977 | 0.407 | 0.037 | 3.69E-15 | 7 METRNL    | 0.37  |
| 3.34E-19 | 0.60927  | 0.444 | 0.045 | 5.26E-15 | 7 SEMA3F    | 0.399 |
| 2.51E-18 | 0.638502 | 0.333 | 0.026 | 3.95E-14 | 7 SLC16A12  | 0.307 |
| 2.51E-18 | 0.642236 | 0.333 | 0.026 | 3.95E-14 | 7 SELL      | 0.307 |
| 3.79E-18 | 1.080527 | 0.704 | 0.124 | 5.96E-14 | 7 PTGIS     | 0.58  |
| 6.41E-18 | 1.19332  | 0.778 | 0.167 | 1.01E-13 | 7 FLNB      | 0.611 |
| 1.47E-17 | 0.606578 | 0.37  | 0.034 | 2.31E-13 | 7 UCHL1     | 0.336 |
| 3.35E-17 | 0.848187 | 0.556 | 0.079 | 5.27E-13 | 7 IL4R      | 0.477 |
| 1.69E-16 | 1.037352 | 0.63  | 0.111 | 2.66E-12 | 7 HMCN1     | 0.519 |
| 3.76E-16 | 1.290547 | 0.667 | 0.137 | 5.91E-12 | 7 GJA1      | 0.53  |
| 5.17E-16 | 1.026192 | 0.556 | 0.094 | 8.14E-12 | 7 TXNRD1    | 0.462 |
| 5.61E-16 | 0.622382 | 0.37  | 0.038 | 8.82E-12 | 7 TMEM100   | 0.332 |
| 6.02E-16 | 0.615151 | 0.444 | 0.055 | 9.47E-12 | 7 ITGA10    | 0.389 |
| 6.12E-16 | 0.687277 | 0.444 | 0.054 | 9.63E-12 | 7 ACSM3     | 0.39  |
| 6.68E-16 | 1.098616 | 0.63  | 0.112 | 1.05E-11 | 7 AKR1C1    | 0.518 |
| 8.78E-16 | 1.11404  | 0.667 | 0.132 | 1.38E-11 | 7 IL1R1     | 0.535 |
| 9.51E-16 | 0.62105  | 0.556 | 0.085 | 1.50E-11 | 7 PXDC1     | 0.471 |
| 1.88E-15 | 0.617094 | 0.296 | 0.026 | 2.96E-11 | 7 GATA4     | 0.27  |
| 2.66E-15 | 0.583498 | 0.407 | 0.048 | 4.18E-11 | 7 MICAL2    | 0.359 |
| 2.71E-14 | 0.957781 | 0.704 | 0.157 | 4.25E-10 | 7 PLVAP     | 0.547 |
| 3.26E-14 | 1.205992 | 0.778 | 0.214 | 5.13E-10 | 7 INMT      | 0.564 |
| 7.19E-14 | 1.28392  | 0.963 | 0.595 | 1.13E-09 | 7 HSPG2     | 0.368 |
| 1.88E-13 | 1.355815 | 0.852 | 0.286 | 2.96E-09 | 7 TGM2      | 0.566 |
| 2.33E-13 | 0.732326 | 0.63  | 0.132 | 3.67E-09 | 7 ITGAV     | 0.498 |
| 3.92E-13 | 0.751942 | 0.407 | 0.057 | 6.17E-09 | 7 ANGPTL4   | 0.35  |
| 4.97E-13 | 1.388922 | 0.704 | 0.193 | 7.81E-09 | 7 CYR61     | 0.511 |
| 9.92E-13 | 0.554875 | 0.259 | 0.024 | 1.56E-08 | 7 IRX3      | 0.235 |
| 1.07E-12 | 0.889734 | 1     | 0.751 | 1.69E-08 | 7 POLR2L    | 0.249 |
| 2.52E-12 | 0.659386 | 0.519 | 0.093 | 3.97E-08 | 7 TSTD1     | 0.426 |
| 2.85E-12 | 0.830717 | 0.667 | 0.163 | 4.49E-08 | 7 SOCS3     | 0.504 |
| 2.95E-12 | 1.225159 | 0.963 | 0.46  | 4.64E-08 | 7 FN1       | 0.503 |
| 3.38E-12 | 0.585556 | 0.444 | 0.071 | 5.32E-08 | 7 SESN3     | 0.373 |
| 4.55E-12 | 0.627208 | 0.407 | 0.06  | 7.16E-08 | 7 COLEC12   | 0.347 |
| 5.29E-12 | 0.701342 | 0.519 | 0.101 | 8.32E-08 | 7 NDRG4     | 0.418 |
| 7.42E-12 | 1.44641  | 0.963 | 0.493 | 1.17E-07 | 7 SAT1      | 0.47  |
| 9.13E-12 | 0.624796 | 0.556 | 0.115 | 1.44E-07 | 7 ST3GAL1   | 0.441 |
| 9.69E-12 | 0.623665 | 1     | 0.973 | 1.52E-07 | 7 RPS21     | 0.027 |
| 1.07E-11 | 0.607603 | 0.63  | 0.14  | 1.68E-07 | 7 METTL7A   | 0.49  |

|          |          |       |       |          |             |       |
|----------|----------|-------|-------|----------|-------------|-------|
| 1.54E-11 | 0.917358 | 0.889 | 0.321 | 2.42E-07 | 7 LIMCH1    | 0.568 |
| 2.12E-11 | 0.969118 | 0.63  | 0.168 | 3.33E-07 | 7 RND3      | 0.462 |
| 2.55E-11 | 0.512146 | 0.333 | 0.044 | 4.01E-07 | 7 TNFRSF12A | 0.289 |
| 2.97E-11 | 0.793897 | 0.667 | 0.181 | 4.67E-07 | 7 CTNNA1    | 0.486 |
| 2.99E-11 | 0.533082 | 0.37  | 0.055 | 4.70E-07 | 7 DIXDC1    | 0.315 |
| 6.53E-11 | 1.104692 | 0.667 | 0.197 | 1.03E-06 | 7 COLEC11   | 0.47  |
| 6.66E-11 | 0.745785 | 1     | 0.5   | 1.05E-06 | 7 ADIRF     | 0.5   |
| 7.86E-11 | 0.752849 | 0.481 | 0.096 | 1.24E-06 | 7 PTPN14    | 0.385 |
| 9.79E-11 | 0.72718  | 0.667 | 0.171 | 1.54E-06 | 7 DKK3      | 0.496 |
| 1.12E-10 | 0.588527 | 0.407 | 0.069 | 1.76E-06 | 7 PDE3A     | 0.338 |
| 1.31E-10 | 0.640524 | 1     | 0.987 | 2.06E-06 | 7 RPL36     | 0.013 |
| 1.79E-10 | 1.187069 | 0.519 | 0.12  | 2.81E-06 | 7 SERPINE1  | 0.399 |
| 2.17E-10 | 0.574363 | 0.407 | 0.072 | 3.41E-06 | 7 AGPS      | 0.335 |
| 2.70E-10 | 0.568688 | 0.37  | 0.06  | 4.25E-06 | 7 ACKR3     | 0.31  |
| 2.95E-10 | 0.73162  | 0.63  | 0.17  | 4.65E-06 | 7 NCOA7     | 0.46  |
| 3.14E-10 | 0.651814 | 0.519 | 0.11  | 4.94E-06 | 7 TGFB3     | 0.409 |
| 3.28E-10 | 1.26637  | 0.963 | 0.516 | 5.16E-06 | 7 IL6ST     | 0.447 |
| 3.50E-10 | 1.281797 | 0.593 | 0.17  | 5.51E-06 | 7 PROCR     | 0.423 |
| 4.70E-10 | 0.814802 | 0.889 | 0.36  | 7.40E-06 | 7 SLC38A2   | 0.529 |
| 6.85E-10 | 0.669694 | 0.444 | 0.092 | 1.08E-05 | 7 TLE1      | 0.352 |
| 1.49E-09 | 0.815733 | 0.963 | 0.51  | 2.34E-05 | 7 RPS2      | 0.453 |
| 1.53E-09 | 0.642136 | 0.556 | 0.136 | 2.41E-05 | 7 CMIP      | 0.42  |
| 1.79E-09 | 0.766197 | 0.778 | 0.269 | 2.82E-05 | 7 ATP1A1    | 0.509 |
| 1.93E-09 | 1.210151 | 0.556 | 0.152 | 3.04E-05 | 7 TMEM150C  | 0.404 |
| 2.08E-09 | 0.787182 | 0.296 | 0.044 | 3.27E-05 | 7 HS3ST1    | 0.252 |
| 2.08E-09 | 0.566665 | 0.556 | 0.132 | 3.27E-05 | 7 ECSCR.1   | 0.424 |
| 2.37E-09 | 0.688213 | 1     | 0.955 | 3.72E-05 | 7 RPLP0     | 0.045 |
| 3.26E-09 | 0.630531 | 1     | 0.935 | 5.13E-05 | 7 RPLP2     | 0.065 |
| 3.56E-09 | 0.791982 | 0.593 | 0.167 | 5.59E-05 | 7 ITGA5     | 0.426 |
| 3.99E-09 | 0.592331 | 1     | 0.99  | 6.27E-05 | 7 RPS12     | 0.01  |
| 4.93E-09 | 0.736838 | 0.556 | 0.151 | 7.76E-05 | 7 KIAA0355  | 0.405 |
| 6.51E-09 | 0.747437 | 0.519 | 0.124 | 0.000102 | 7 SRPX      | 0.395 |
| 6.80E-09 | 0.924288 | 0.778 | 0.28  | 0.000107 | 7 ECE1      | 0.498 |
| 9.65E-09 | 0.643601 | 0.407 | 0.085 | 0.000152 | 7 ZMAT3     | 0.322 |
| 1.23E-08 | 0.915255 | 1     | 0.98  | 0.000194 | 7 FTL       | 0.02  |
| 1.29E-08 | 0.696151 | 1     | 0.99  | 0.000203 | 7 TPT1      | 0.01  |
| 1.67E-08 | 0.629421 | 0.407 | 0.084 | 0.000262 | 7 AKR1C2    | 0.323 |
| 1.96E-08 | 0.598378 | 0.556 | 0.142 | 0.000308 | 7 EPN1      | 0.414 |
| 2.20E-08 | 0.632205 | 1     | 0.968 | 0.000346 | 7 RPL3      | 0.032 |
| 2.61E-08 | 0.636911 | 0.667 | 0.208 | 0.000411 | 7 FAM213A   | 0.459 |
| 3.48E-08 | 0.676475 | 0.815 | 0.332 | 0.000547 | 7 SERPINE2  | 0.483 |
| 3.93E-08 | 0.777122 | 1     | 0.869 | 0.000618 | 7 S100A6    | 0.131 |
| 5.57E-08 | 0.681528 | 0.519 | 0.148 | 0.000876 | 7 TMEM106C  | 0.371 |
| 7.65E-08 | 0.561234 | 0.519 | 0.133 | 0.001204 | 7 NEXN      | 0.386 |
| 1.01E-07 | 0.552827 | 1     | 0.977 | 0.001592 | 7 RPS18     | 0.023 |
| 1.13E-07 | 0.567515 | 0.556 | 0.16  | 0.001772 | 7 DHRS3     | 0.396 |
| 1.73E-07 | 0.671872 | 0.852 | 0.454 | 0.00272  | 7 NGFRAP1   | 0.398 |
| 1.99E-07 | 0.511824 | 0.519 | 0.143 | 0.003133 | 7 TMEM98    | 0.376 |
| 2.00E-07 | 0.766144 | 0.889 | 0.607 | 0.003146 | 7 RPL13A    | 0.282 |
| 2.46E-07 | 0.696349 | 0.926 | 0.538 | 0.003867 | 7 RPS17     | 0.388 |
| 2.52E-07 | 0.919887 | 0.963 | 0.512 | 0.003957 | 7 VWF       | 0.451 |
| 2.65E-07 | 0.60218  | 0.37  | 0.085 | 0.004163 | 7 TNFRSF10E | 0.285 |
| 3.23E-07 | 0.804642 | 0.704 | 0.289 | 0.005081 | 7 ACTN1     | 0.415 |
| 5.65E-07 | 0.517989 | 0.444 | 0.119 | 0.008879 | 7 ST6GAL1   | 0.325 |
| 5.68E-07 | 0.68284  | 0.815 | 0.465 | 0.008938 | 7 TSPO      | 0.35  |
| 5.75E-07 | 0.514731 | 0.259 | 0.045 | 0.009049 | 7 SIK2      | 0.214 |
| 5.91E-07 | 0.527099 | 1     | 0.964 | 0.009301 | 7 RPL37     | 0.036 |
| 6.81E-07 | 0.78787  | 0.815 | 0.376 | 0.010709 | 7 NUPR1     | 0.439 |

|          |          |       |       |          |             |       |
|----------|----------|-------|-------|----------|-------------|-------|
| 6.93E-07 | 1.003087 | 0.667 | 0.336 | 0.010897 | 7 HEG1      | 0.331 |
| 9.50E-07 | 0.751019 | 0.741 | 0.324 | 0.014943 | 7 BMPR2     | 0.417 |
| 9.53E-07 | 0.767717 | 0.593 | 0.206 | 0.014993 | 7 STAT1     | 0.387 |
| 1.06E-06 | 0.548708 | 0.63  | 0.218 | 0.016693 | 7 LTBP3     | 0.412 |
| 1.11E-06 | 0.878094 | 0.593 | 0.221 | 0.017515 | 7 PRSS23    | 0.372 |
| 1.32E-06 | 0.747799 | 0.481 | 0.149 | 0.020787 | 7 RBP1      | 0.332 |
| 1.48E-06 | 0.539459 | 1     | 0.851 | 0.023285 | 7 RPS29     | 0.149 |
| 1.57E-06 | 0.578435 | 0.852 | 0.389 | 0.024642 | 7 LINC00657 | 0.463 |
| 1.61E-06 | 0.682326 | 0.778 | 0.391 | 0.025343 | 7 DUSP1     | 0.387 |
