# Supplementary figures and images for: Single-Cell Sequencing Revealed Pivotal Genes Related to Prognosis of Myocardial Infarction Patients
Source: Hindawi journal article supplement (doi:10.1155/2022/6534126), 2022-03-12

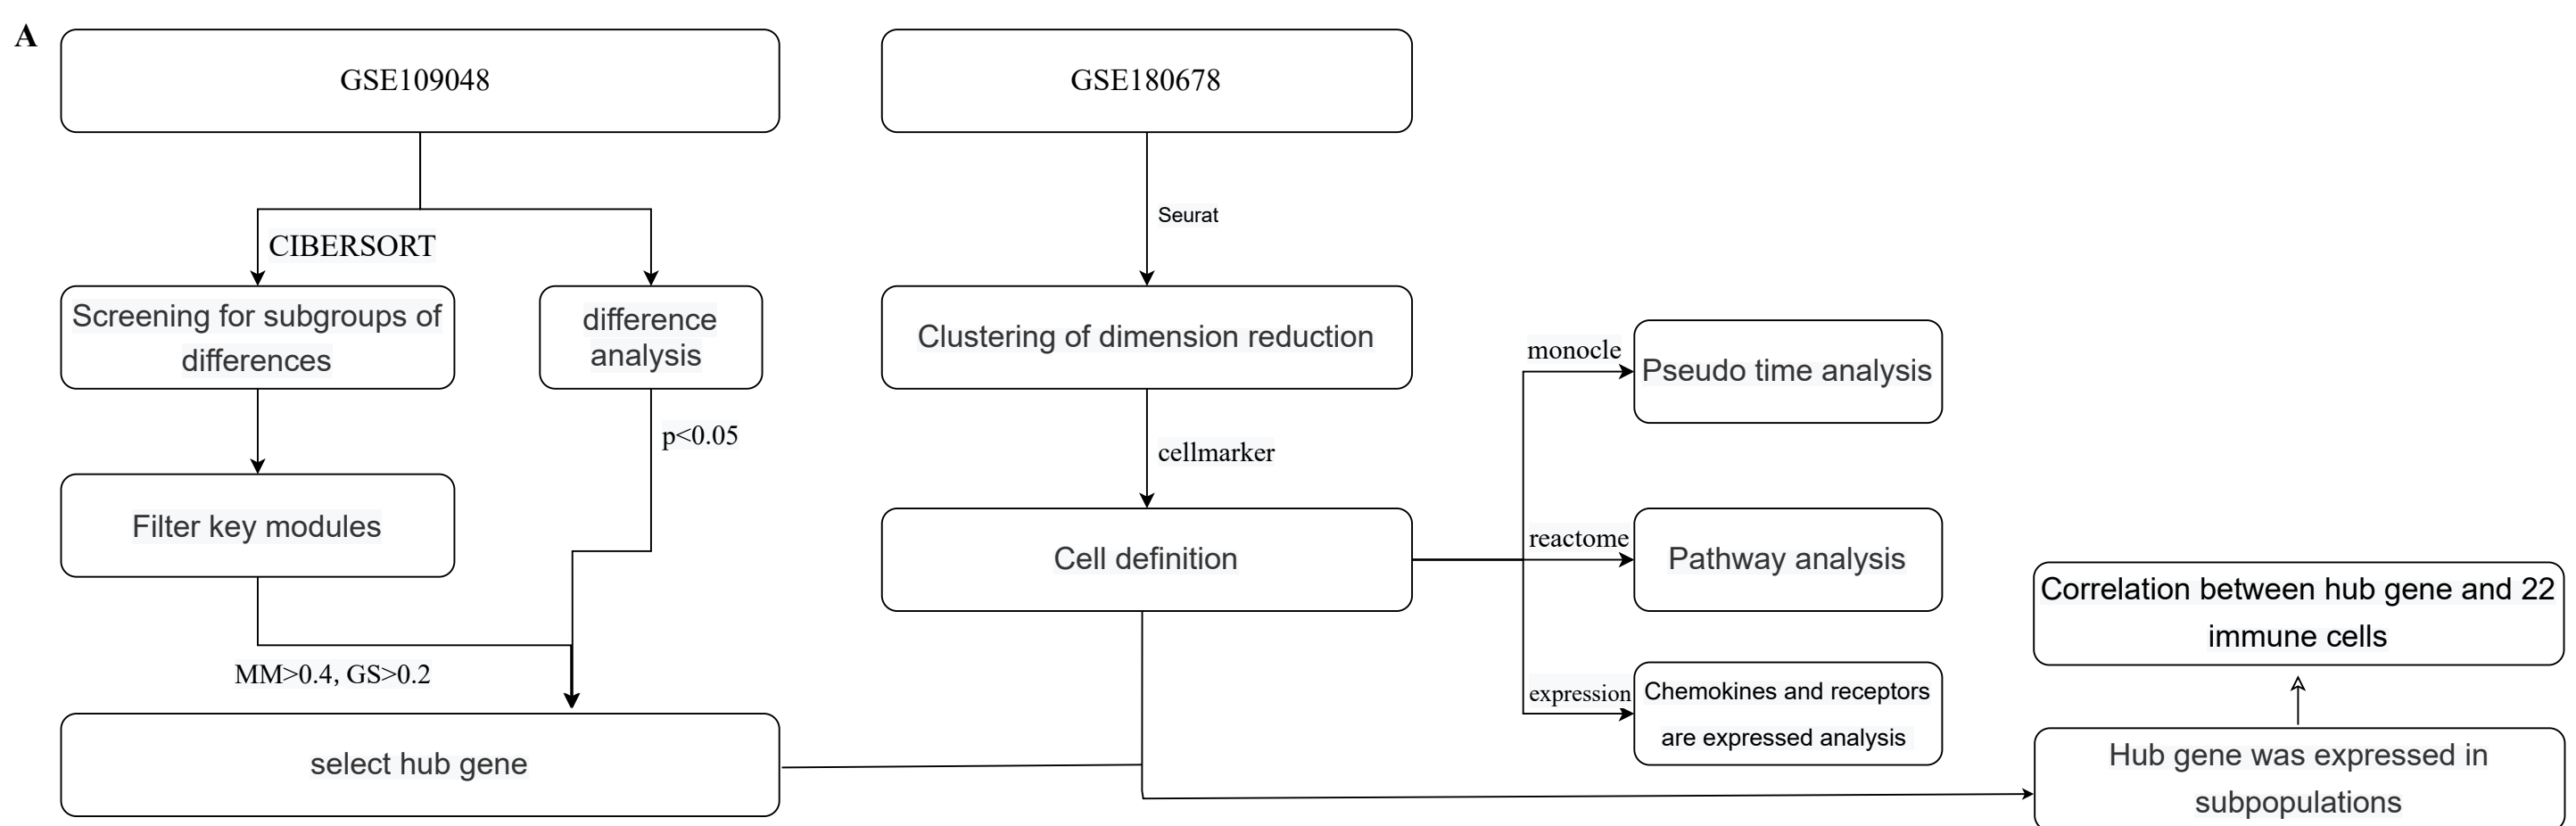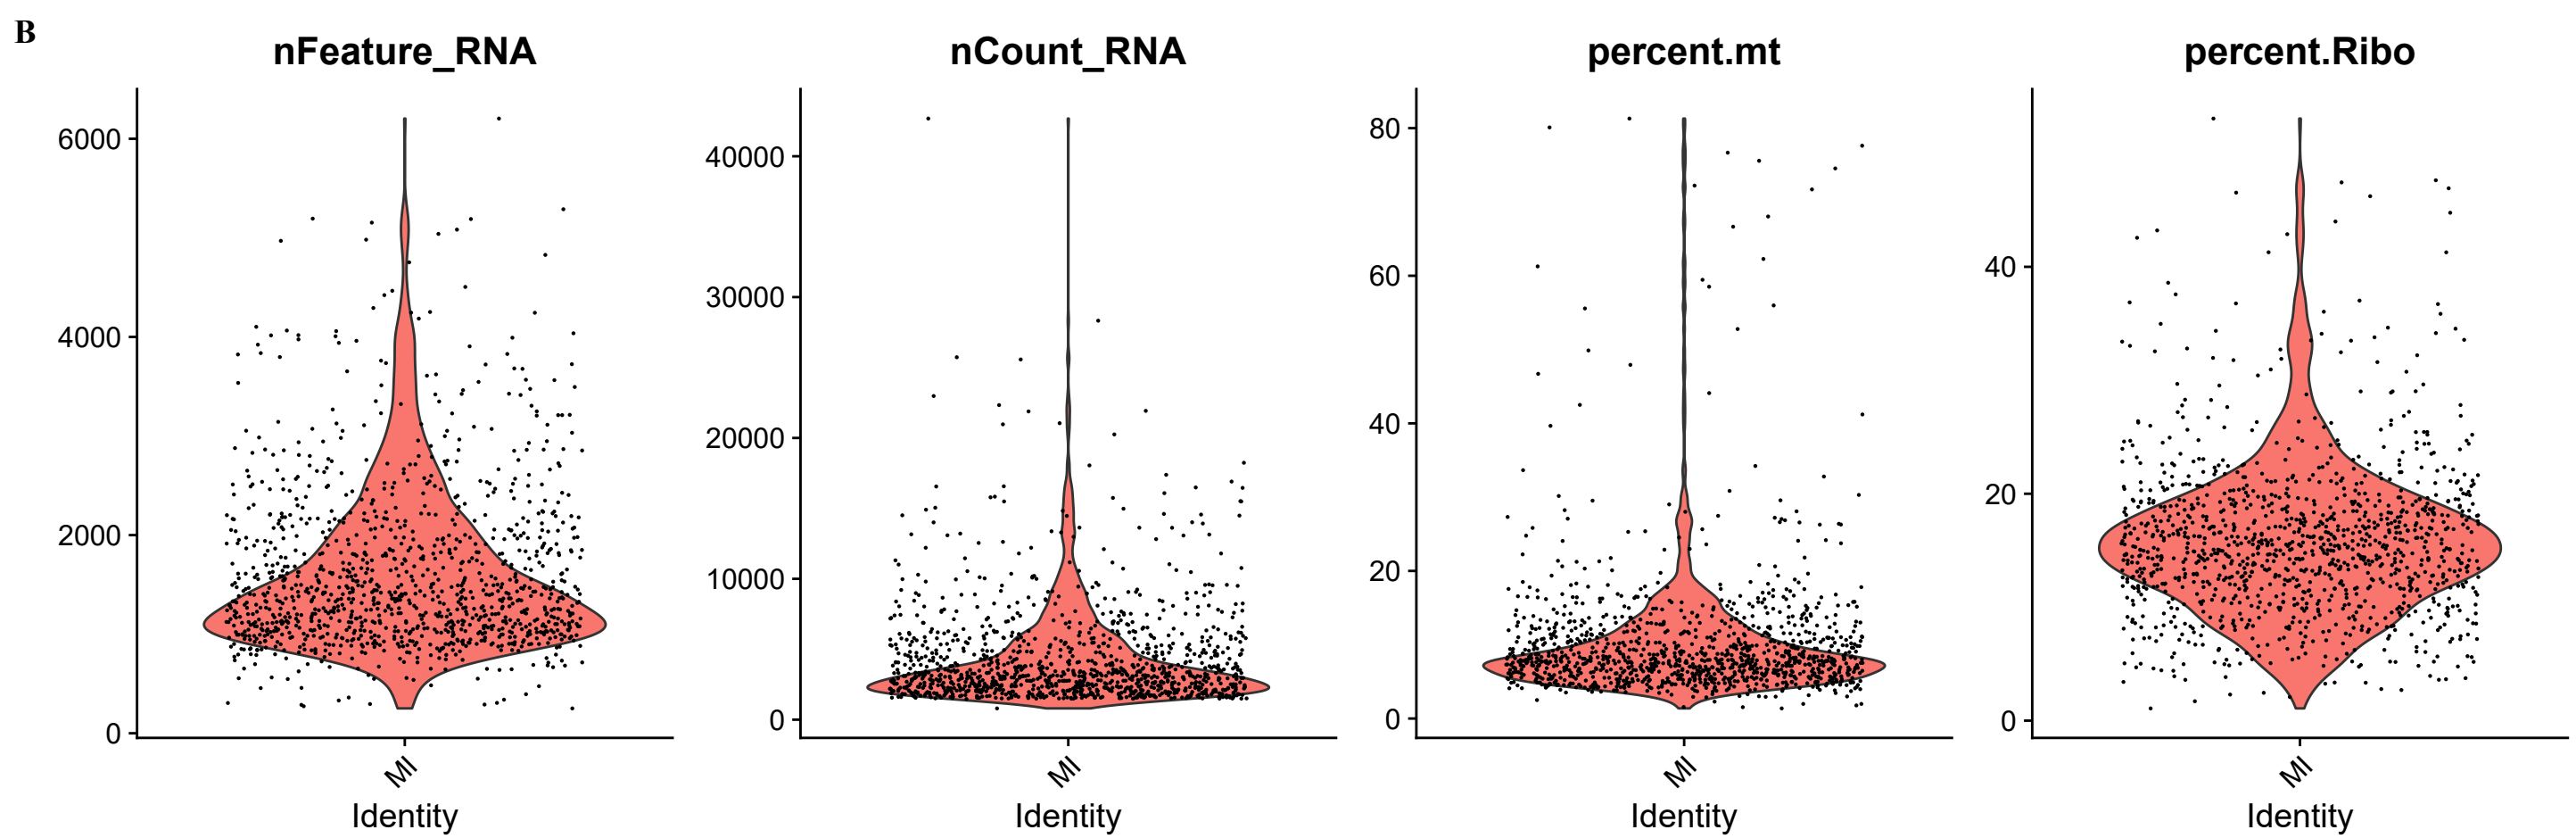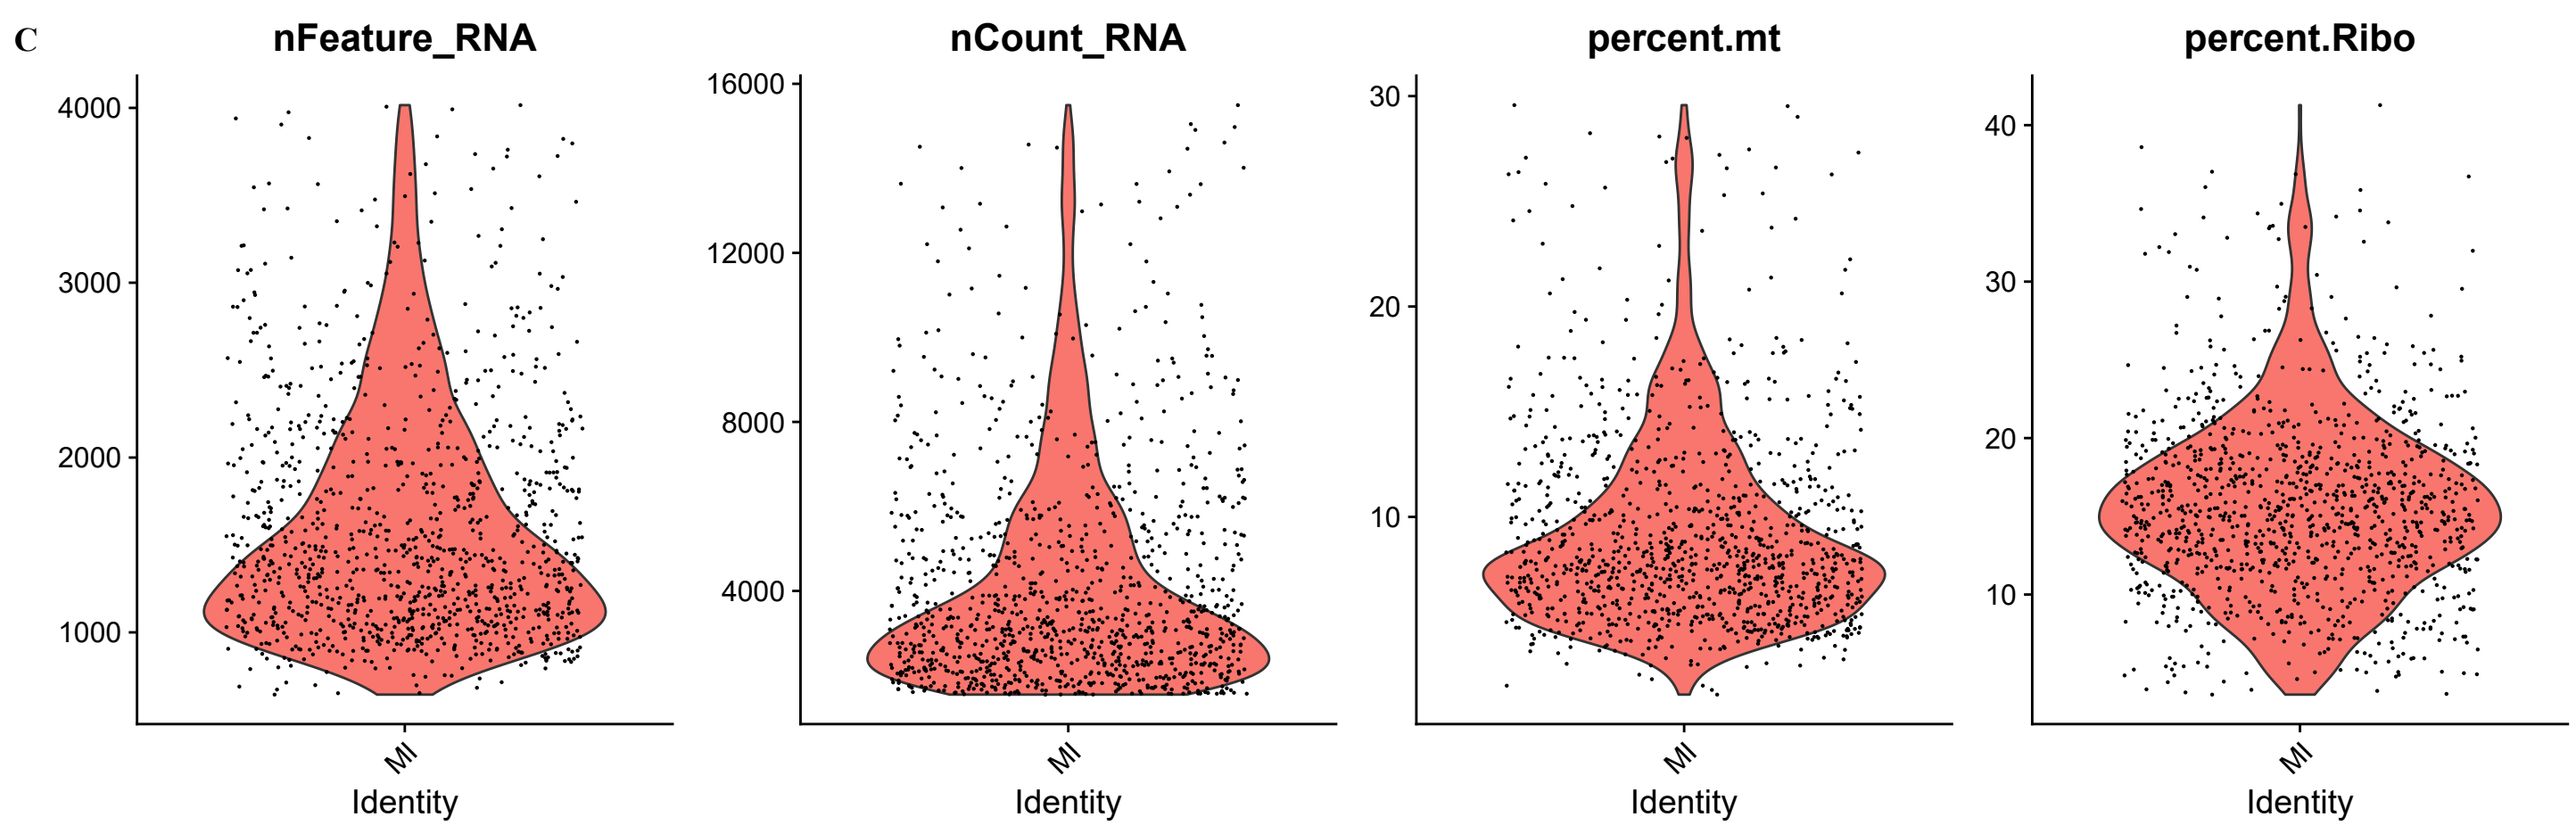

Supplement: f1 [file 6534126.f1.pdf]

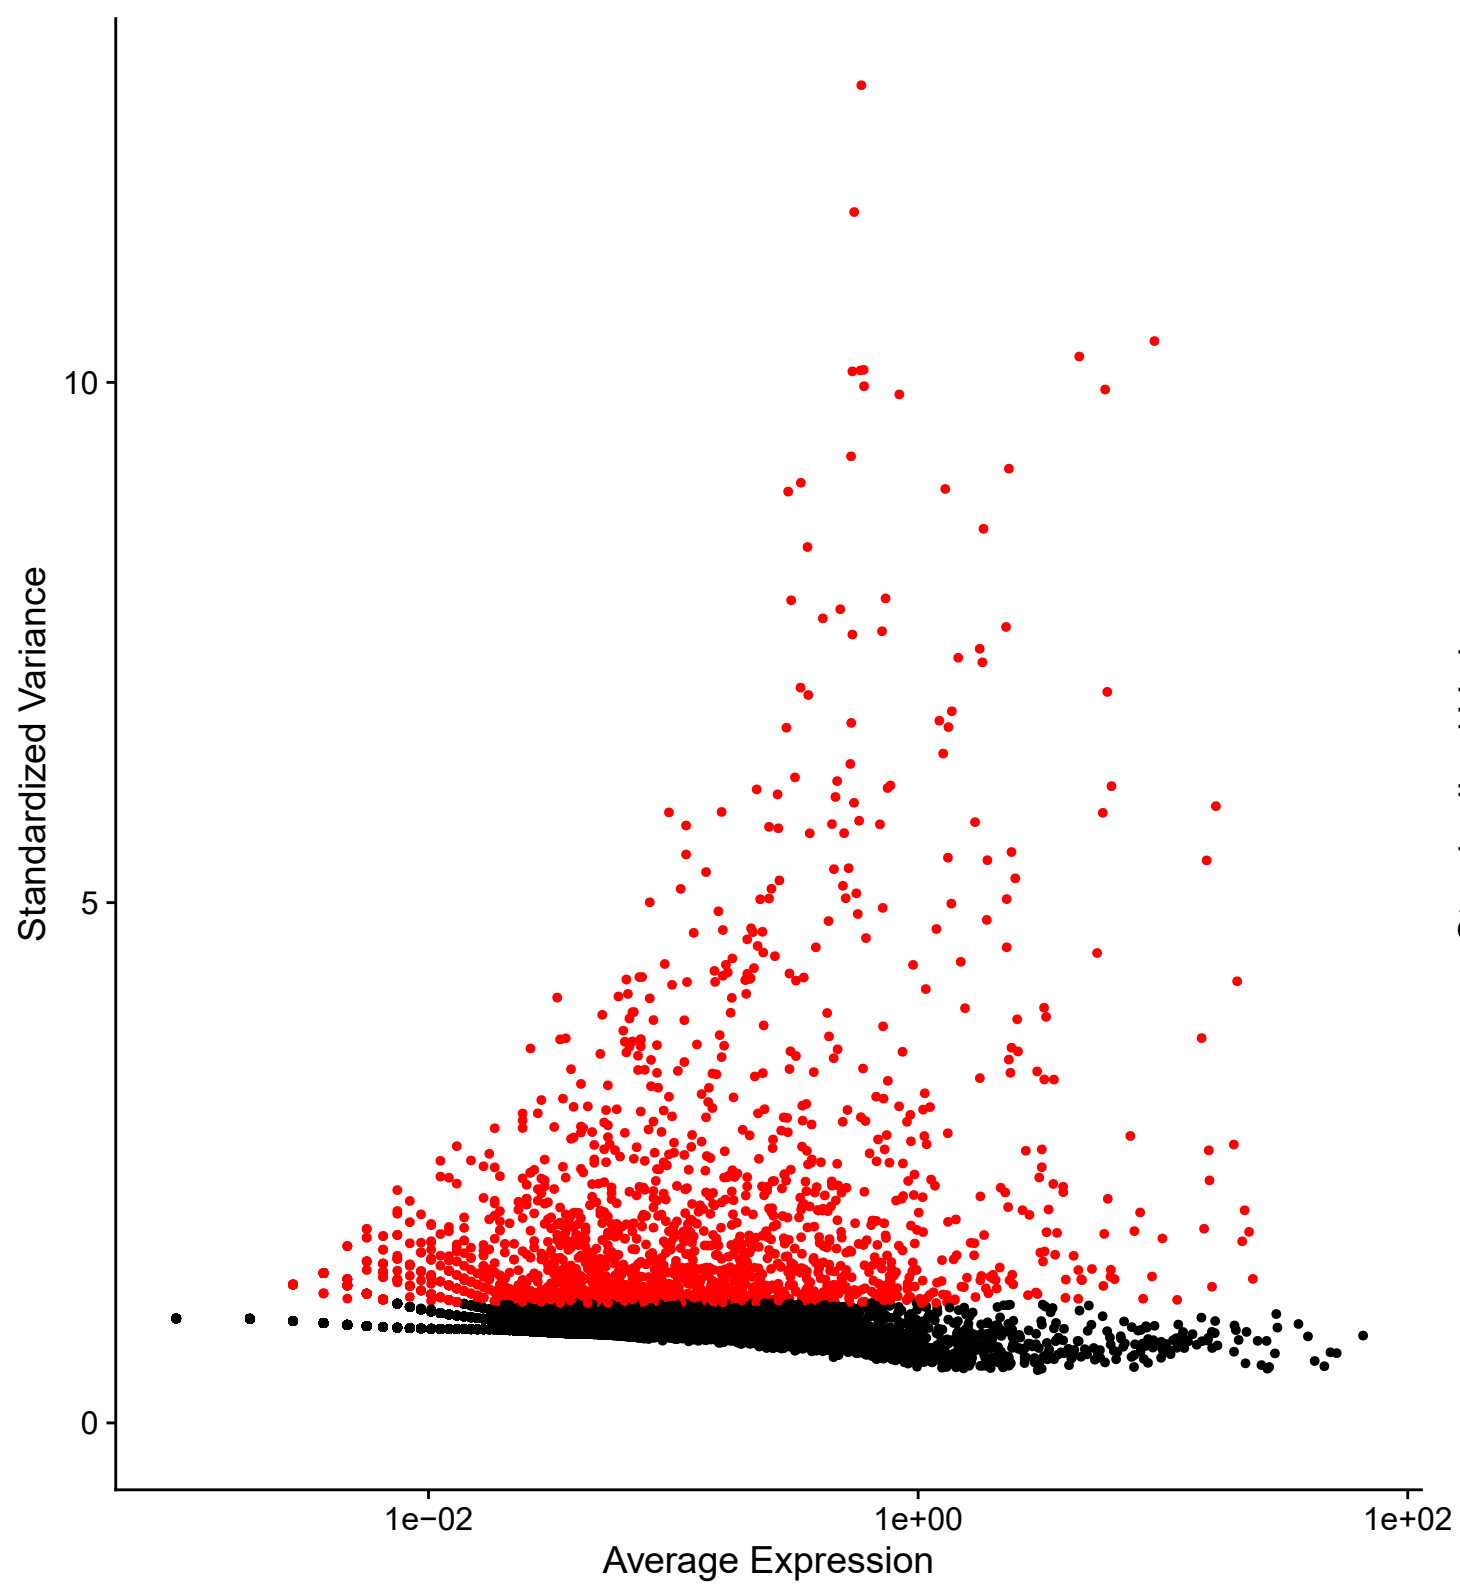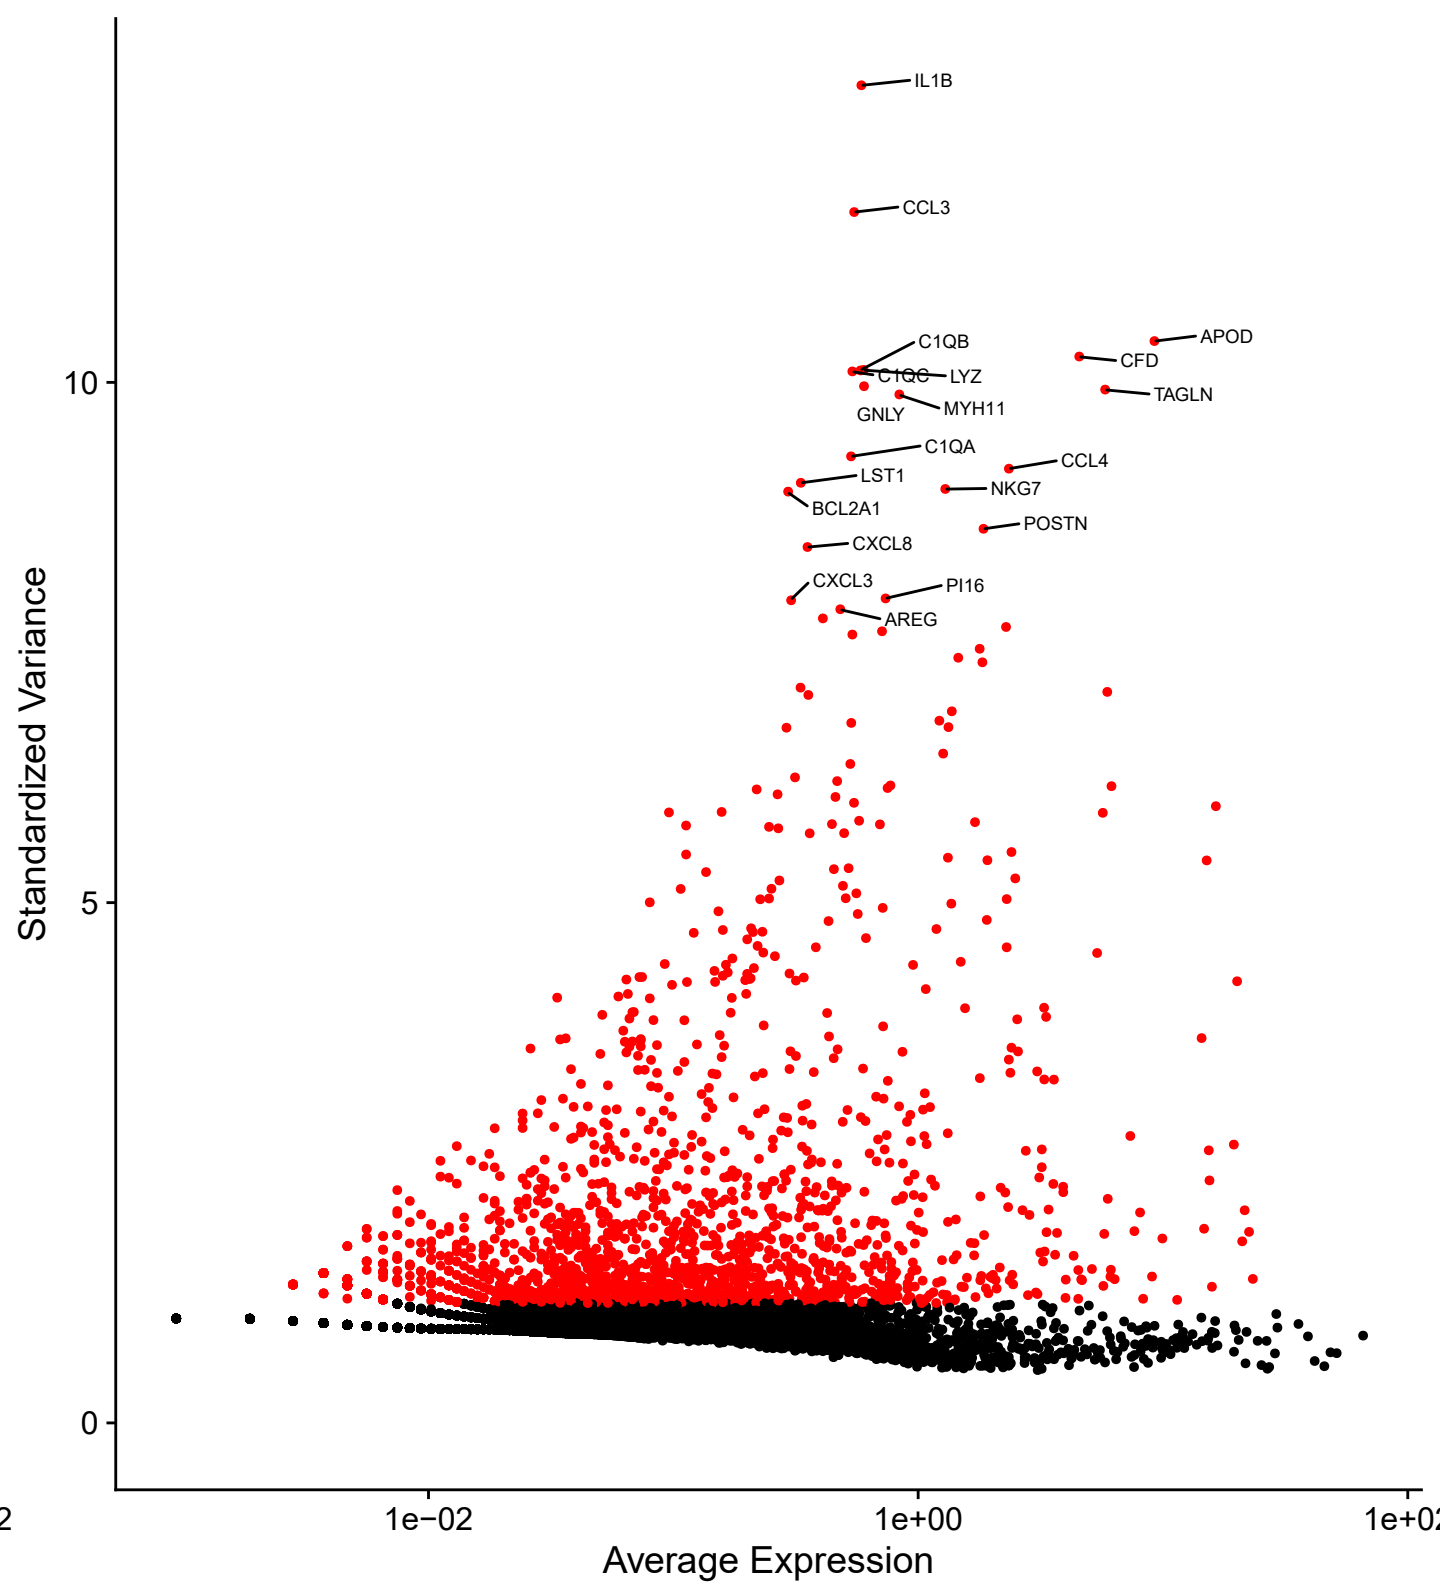

• Non-variable count: 13726 • Variable count: 2000

Supplement: f2 [file 6534126.f2.pdf]

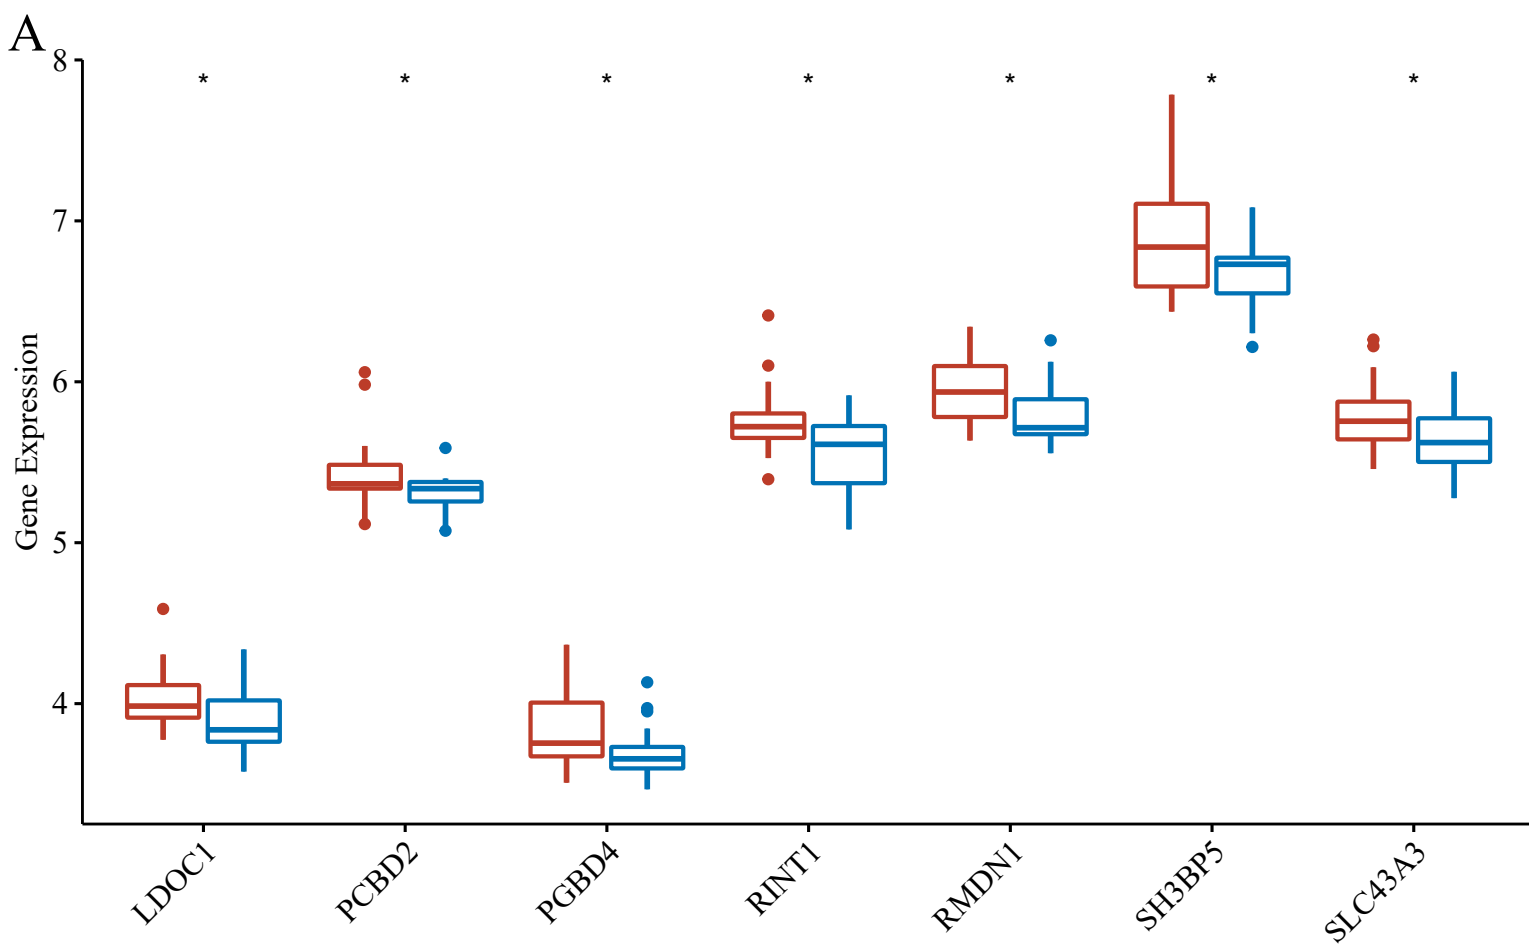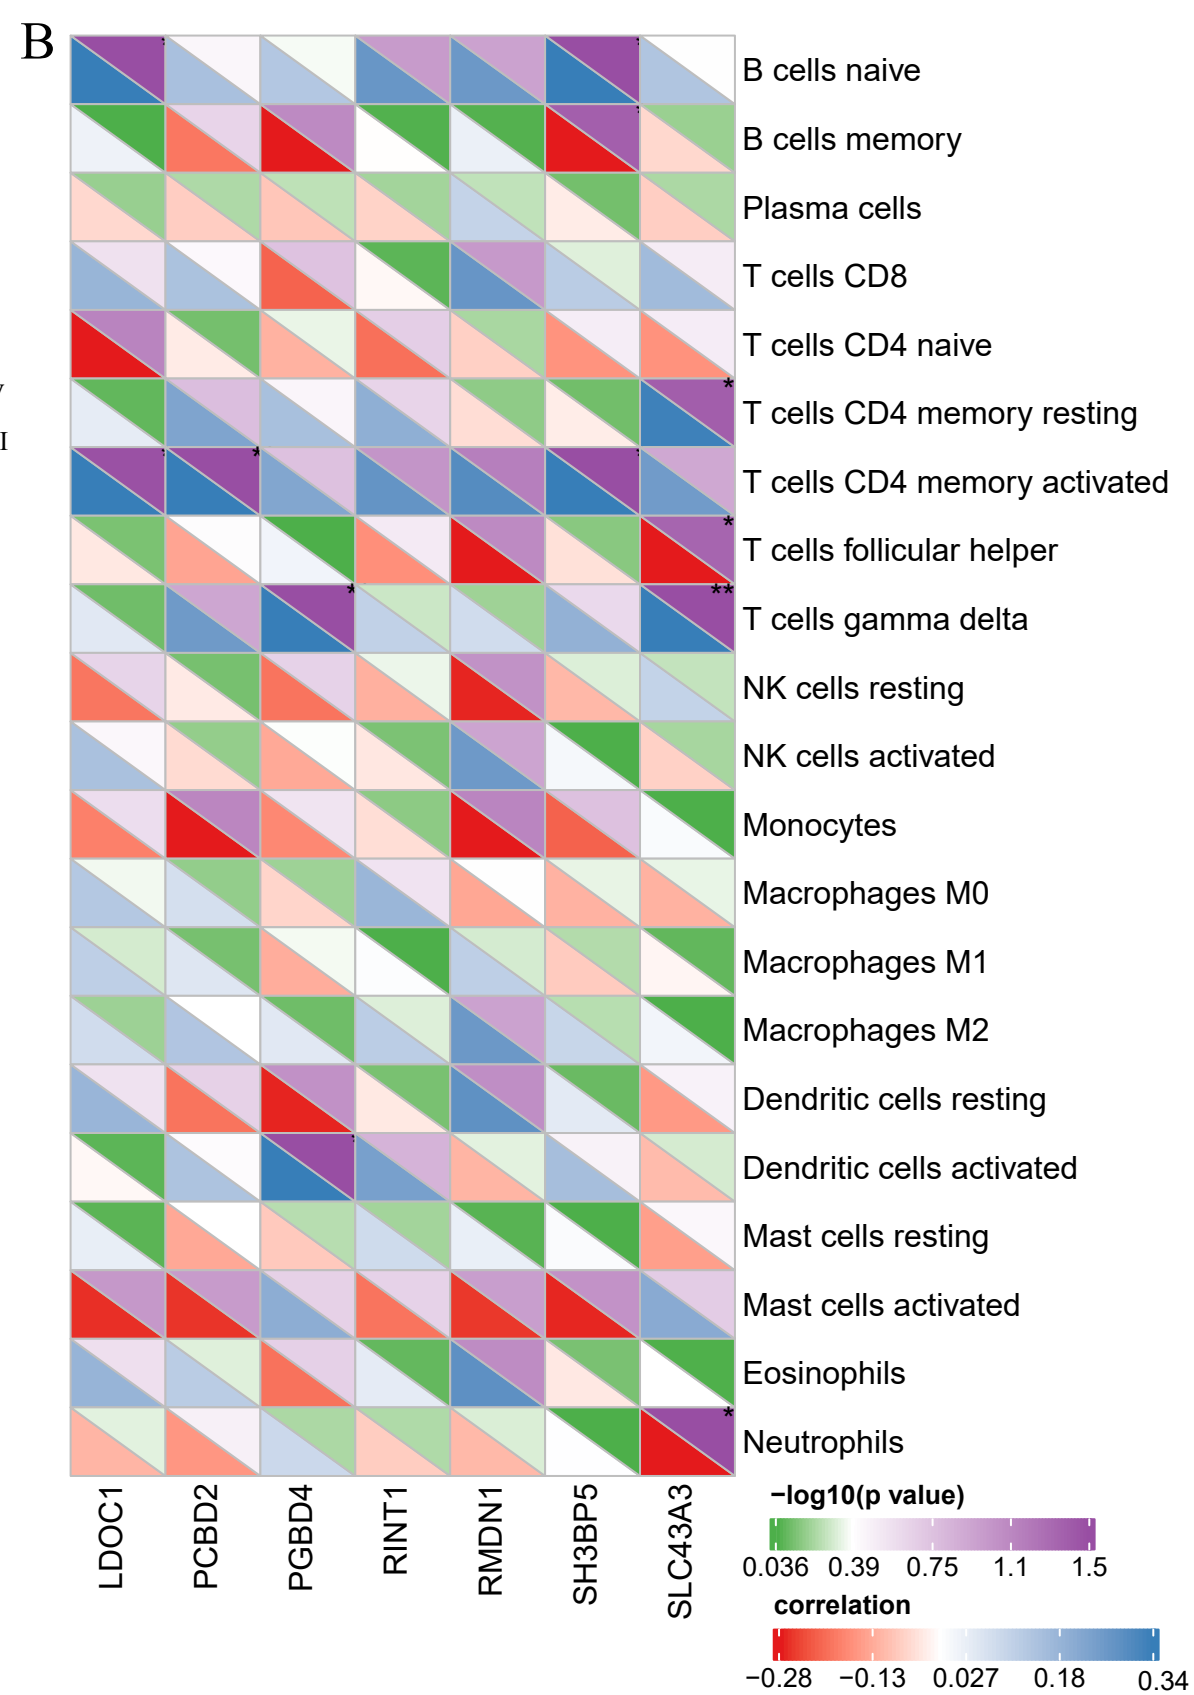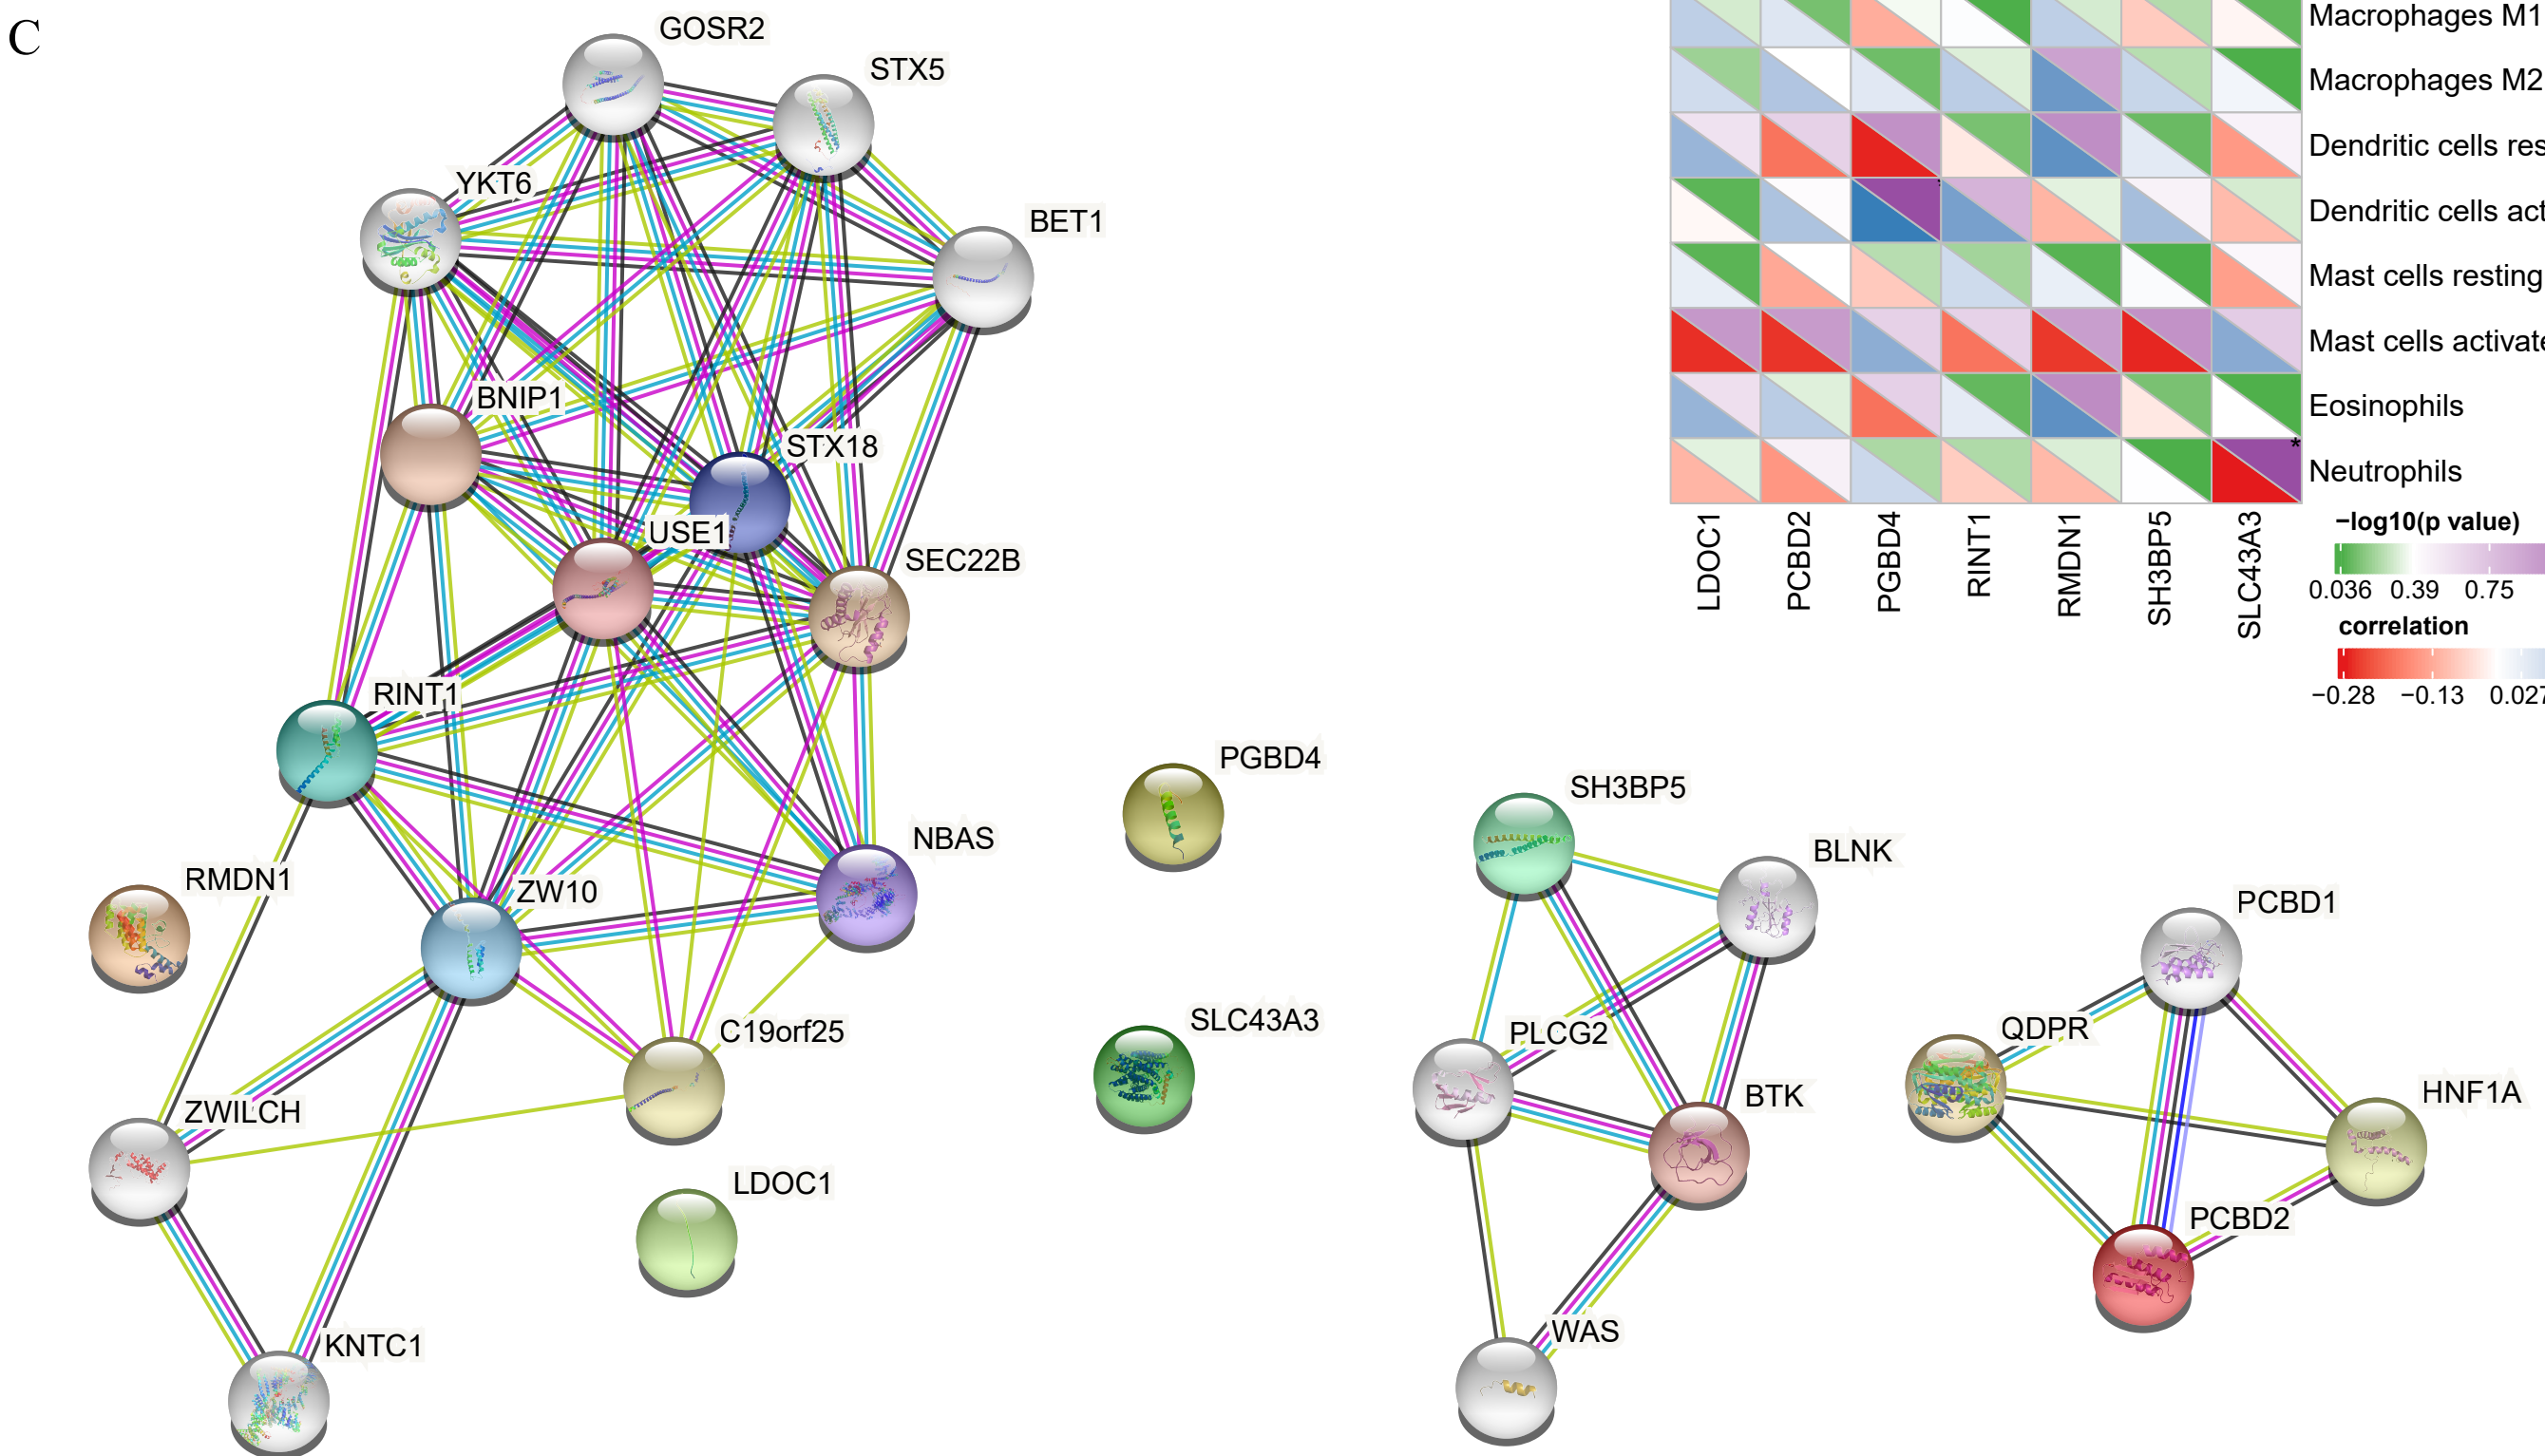

Supplement: f3 [file 6534126.f3.pdf]
